# Supplementary material
Source: publisher figshare collection journal article supplement (https://rs.figshare.com/ndownloader/files/16334546)
Supplement: Supplementary file 1 [file 16334546]

## Sheet: Supplement metadata
tab	description
Table S1	Database of all zoonotic viruses with associated host and viral traits (n=420 virus-mammal associations)
Table S2	Database of all viruses with associated virus traits (n=345 unique viruses)
Table S3	Database of host trait information used in our analysis (n=278 mammal species)
Table S4	Metadata for variables included in both Table S1 and Table S2 databases
Table S5	Summaries of all selected GAMs
Table S6	Pearson correlation coefficients for host predictors
Table S7	Effect of host phylogenetic order on human case fatality rate
Table S8	Review of main findings from past meta-analyses
Trait references	References for viral and host traits collected in this study
Detection references	Supplementary references for host-virus associations from Olival et al. 201.

## Sheet: Table S1
Table S1. Database of all zoonotic viruses with associated host and viral traits (n=420 virus-mammal associations).
vVirusNameCorrected	hHostNameFinal	reservoir.status	spillover.capacity	animal.severity	trans.route	lower.mort	upper.mort	inf.period	symptoms	human.trans	recombination	notes	WildDomInReference	DetectionMethod	hOrder	hFamily	hGenus	hSpecies	vOrder	vFamily	vSubfamily	vGenus	vGenomeAveLength	vCytoReplicTF	vSegmentedTF	vSSoDS	vDNAoRNA	vEnvelope	References_traits	References_detection..Olival.et.al..2017.	avg.mort	AdultBodyMass_g	LitterSize	MaxLongevity_m	GestationLen_d	hAllZACites	hDiseaseZACites	phylo.dist.humans.species	zoonoses	TotVirus	max_breadth	max_hum_dist	Genome.comp	IsZoonotic.stringent	trans.stat
Andes_virus	Abrothrix_longipilis	1	1	1	fecal-oral, respiratory	37	37	1	hantavirus cardiopulmonary syndrome (HCPS)	2	high	Only hantavirus with recorded human-to-human transmission	wild	PCR	RODENTIA	CRICETIDAE	Abrothrix	longipilis	Bunyavirales	Hantaviridae	NA	Orthohantavirus	10233	TRUE	TRUE	SS	RNA	enveloped	Ferres et al. 2007; Martinez et al. 2005; Toro et al. 1998	Medina et al. 2009	37	38.86	3.7	12	20	53	10	0.797125	1	1	0.624938	0.877599	ssRNA(-)	1	direct_host
Andes_virus	Calomys_tener	1	1	1	fecal-oral, respiratory	37	37	1	hantavirus cardiopulmonary syndrome (HCPS)	2	high	Only hantavirus with recorded human-to-human transmission	wild	PCR	RODENTIA	CRICETIDAE	Calomys	tener	Bunyavirales	Hantaviridae	NA	Orthohantavirus	10233	TRUE	TRUE	SS	RNA	enveloped	Ferres et al. 2007; Martinez et al. 2005; Toro et al. 1998	de Figueirodo et al. 2010	37	13.8	5.49	13.5	22.59	26	3	0.836405	1	1	0.624938	0.877599	ssRNA(-)	1	direct_host
Andes_virus	Necromys_obscurus	1	1	1	fecal-oral, respiratory	37	37	1	hantavirus cardiopulmonary syndrome (HCPS)	2	high	Only hantavirus with recorded human-to-human transmission	wild	PCR	RODENTIA	CRICETIDAE	Necromys	obscurus	Bunyavirales	Hantaviridae	NA	Orthohantavirus	10233	TRUE	TRUE	SS	RNA	enveloped	Ferres et al. 2007; Martinez et al. 2005; Toro et al. 1998	Levis et al. 1997	37	40.69	4.86	11	21.97	4	2	0.849421	3	4	0.624938	0.877599	ssRNA(-)	1	direct_host
Andes_virus	Thaptomys_nigrita	1	1	1	fecal-oral, respiratory	37	37	1	hantavirus cardiopulmonary syndrome (HCPS)	2	high	Only hantavirus with recorded human-to-human transmission	wild	PCR	RODENTIA	CRICETIDAE	Thaptomys	nigrita	Bunyavirales	Hantaviridae	NA	Orthohantavirus	10233	TRUE	TRUE	SS	RNA	enveloped	Ferres et al. 2007; Martinez et al. 2005; Toro et al. 1998	Araujo et al. 2011	37	19.9	5.44	62.4	27	18	4	0.768022	1	1	0.624938	0.877599	ssRNA(-)	1	direct_host
Andes_virus	Oligoryzomys_flavescens	1	1	1	fecal-oral, respiratory	37	37	1	hantavirus cardiopulmonary syndrome (HCPS)	2	high	Only hantavirus with recorded human-to-human transmission	wild	PCR	RODENTIA	CRICETIDAE	Oligoryzomys	flavescens	Bunyavirales	Hantaviridae	NA	Orthohantavirus	10233	TRUE	TRUE	SS	RNA	enveloped	Ferres et al. 2007; Martinez et al. 2005; Toro et al. 1998	Medina et al. 2009	37	21.3	4.95	21.5	20.59	71	27	0.83635	2	3	0.624938	0.877599	ssRNA(-)	1	direct_host
Andes_virus	Oligoryzomys_nigripes	1	1	1	fecal-oral, respiratory	37	37	1	hantavirus cardiopulmonary syndrome (HCPS)	2	high	Only hantavirus with recorded human-to-human transmission	wild	PCR	RODENTIA	CRICETIDAE	Oligoryzomys	nigripes	Bunyavirales	Hantaviridae	NA	Orthohantavirus	10233	TRUE	TRUE	SS	RNA	enveloped	Ferres et al. 2007; Martinez et al. 2005; Toro et al. 1998	Padula et al. 2007	37	20.33	3.59	21.5	20.59	64	22	0.828464	1	2	0.624938	0.877599	ssRNA(-)	1	direct_host
Andes_virus	Rattus_rattus	1	1	1	fecal-oral, respiratory	37	37	1	hantavirus cardiopulmonary syndrome (HCPS)	2	high	Only hantavirus with recorded human-to-human transmission	domestic	PCR	RODENTIA	MURIDAE	Rattus	rattus	Bunyavirales	Hantaviridae	NA	Orthohantavirus	10233	TRUE	TRUE	SS	RNA	enveloped	Ferres et al. 2007; Martinez et al. 2005; Toro et al. 1998	Medina et al. 2009	37	142.68	5.88	50.4	23.45	3004	1193	0.664981	5	11	0.624938	0.877599	ssRNA(-)	1	direct_host
Andes_virus	Oligoryzomys_chacoensis	1	1	1	fecal-oral, respiratory	37	37	1	hantavirus cardiopulmonary syndrome (HCPS)	2	high	Only hantavirus with recorded human-to-human transmission	wild	PCR	RODENTIA	CRICETIDAE	Oligoryzomys	chacoensis	Bunyavirales	Hantaviridae	NA	Orthohantavirus	10233	TRUE	TRUE	SS	RNA	enveloped	Ferres et al. 2007; Martinez et al. 2005; Toro et al. 1998	Chu et al. 2003	37	23	4.2375	21.5	20.59	15	4	0.837345	1	1	0.624938	0.877599	ssRNA(-)	1	direct_host
Andes_virus	Rattus_norvegicus	1	1	1	fecal-oral, respiratory	37	37	1	hantavirus cardiopulmonary syndrome (HCPS)	2	high	Only hantavirus with recorded human-to-human transmission	wild	PCR	RODENTIA	MURIDAE	Rattus	norvegicus	Bunyavirales	Hantaviridae	NA	Orthohantavirus	10233	TRUE	TRUE	SS	RNA	enveloped	Ferres et al. 2007; Martinez et al. 2005; Toro et al. 1998	Fernandez et al. 2008	37	282.89	8.99	50.4	21.74	3365	1198	0.662617	6	15	0.624938	0.877599	ssRNA(-)	1	direct_host
Andes_virus	Necromys_benefactus	1	1	1	fecal-oral, respiratory	37	37	1	hantavirus cardiopulmonary syndrome (HCPS)	2	high	Only hantavirus with recorded human-to-human transmission	wild	PCR	RODENTIA	CRICETIDAE	Necromys	benefactus	Bunyavirales	Hantaviridae	NA	Orthohantavirus	10233	TRUE	TRUE	SS	RNA	enveloped	Ferres et al. 2007; Martinez et al. 2005; Toro et al. 1998	Chu et al. 2006	37	40.31	4.68	11	21.97	8	3	0.855656	1	2	0.624938	0.877599	ssRNA(-)	1	direct_host
Andes_virus	Oligoryzomys_fulvescens	1	1	1	fecal-oral, respiratory	37	37	1	hantavirus cardiopulmonary syndrome (HCPS)	2	high	Only hantavirus with recorded human-to-human transmission	wild	Isolation	RODENTIA	CRICETIDAE	Oligoryzomys	fulvescens	Bunyavirales	Hantaviridae	NA	Orthohantavirus	10233	TRUE	TRUE	SS	RNA	enveloped	Ferres et al. 2007; Martinez et al. 2005; Toro et al. 1998	Hanson et al. 2011	37	25	3.64	21.5	20.59	16	9	0.804583	2	2	0.624938	0.877599	ssRNA(-)	1	direct_host
Andes_virus	Oligoryzomys_longicaudatus	1	1	1	fecal-oral, respiratory	37	37	1	hantavirus cardiopulmonary syndrome (HCPS)	2	high	Only hantavirus with recorded human-to-human transmission	wild	PCR	RODENTIA	CRICETIDAE	Oligoryzomys	longicaudatus	Bunyavirales	Hantaviridae	NA	Orthohantavirus	10233	TRUE	TRUE	SS	RNA	enveloped	Ferres et al. 2007; Martinez et al. 2005; Toro et al. 1998	Medina et al. 2009	37	27.54	4.77	21.5	20.59	62	23	0.823008	2	2	0.624938	0.877599	ssRNA(-)	1	direct_host
Andes_virus	Necromys_lasiurus	1	1	1	fecal-oral, respiratory	37	37	1	hantavirus cardiopulmonary syndrome (HCPS)	2	high	Only hantavirus with recorded human-to-human transmission	wild	PCR	RODENTIA	CRICETIDAE	Necromys	lasiurus	Bunyavirales	Hantaviridae	NA	Orthohantavirus	10233	TRUE	TRUE	SS	RNA	enveloped	Ferres et al. 2007; Martinez et al. 2005; Toro et al. 1998	Suzuki et al. 2004	37	39.93	4.5	11	21.97	29	6	0.844881	1	1	0.624938	0.877599	ssRNA(-)	1	direct_host
Andes_virus	Loxodontomys_micropus	1	1	1	fecal-oral, respiratory	37	37	1	hantavirus cardiopulmonary syndrome (HCPS)	2	high	Only hantavirus with recorded human-to-human transmission	wild	PCR	RODENTIA	CRICETIDAE	Loxodontomys	micropus	Bunyavirales	Hantaviridae	NA	Orthohantavirus	10233	TRUE	TRUE	SS	RNA	enveloped	Ferres et al. 2007; Martinez et al. 2005; Toro et al. 1998	Informatics 2010; Medina et al. 2009	37	70.76	4.16	24	20.11	19	4	0.859791	1	1	0.624938	0.877599	ssRNA(-)	1	direct_host
Andes_virus	Akodon_montensis	1	1	1	fecal-oral, respiratory	37	37	1	hantavirus cardiopulmonary syndrome (HCPS)	2	high	Only hantavirus with recorded human-to-human transmission	wild	PCR	RODENTIA	CRICETIDAE	Akodon	montensis	Bunyavirales	Hantaviridae	NA	Orthohantavirus	10233	TRUE	TRUE	SS	RNA	enveloped	Ferres et al. 2007; Martinez et al. 2005; Toro et al. 1998	Chu et al. 2003	37	13.52	5	12	23	50	12	0.8666	1	1	0.624938	0.877599	ssRNA(-)	1	direct_host
Araraquara_virus	Necromys_lasiurus	1	1	1	fecal-oral, respiratory	40	44.5	1	hantavirus cardiopulmonary syndrome (HCPS)	2	high	The most virulent hantavirus in South America	wild	PCR	RODENTIA	CRICETIDAE	Necromys	lasiurus	Bunyavirales	Hantaviridae	NA	Orthohantavirus	12000	TRUE	TRUE	SS	RNA	enveloped	Figueiredo et al. 2009; Figueiredo et al. 2010	de Figueirodo et al. 2010	42.25	39.93	4.5	11	21.97	29	6	0.844881	1	1	NA	0.844881	ssRNA(-)	1	direct_host
Australian_bat_lyssavirus	Saccolaimus_saccolaimus	1	1	4	saliva	100	100	1	encephalitis	1	low	Only three human cases - all have been fatal; infectious period ranges from 20-28 days	wild	Isolation	CHIROPTERA	EMBALLONURIDAE	Saccolaimus	saccolaimus	Mononegavirales	Rhabdoviridae	NA	Lyssavirus	11822	TRUE	FALSE	SS	RNA	enveloped	Fraser et al. 1996; Speare et al. 1997; Francis et al. 2014; Field 2018	Calisher et al. 2006	100	43	1	60	106.86	47	11	0.843179	1	1	0.673767	0.881401	ssRNA(-)	1	direct_host
Australian_bat_lyssavirus	Saccolaimus_flaviventris	1	1	4	saliva	100	100	1	encephalitis	1	low	Only three human cases - all have been fatal; infectious period ranges from 20-28 days	wild	Isolation	CHIROPTERA	EMBALLONURIDAE	Saccolaimus	flaviventris	Mononegavirales	Rhabdoviridae	NA	Lyssavirus	11822	TRUE	FALSE	SS	RNA	enveloped	Calisher et al. 2006; Francis et al. 2014; Field 2018	Calisher et al. 2006; Wong et al. 2007	100	45.25	1	60	106.86	10	3	0.766251	1	1	0.673767	0.881401	ssRNA(-)	1	direct_host
Australian_bat_lyssavirus	Pteropus_scapulatus	1	1	4	saliva	100	100	1	encephalitis	1	low	Only three human cases - all have been fatal; infectious period ranges from 20-28 days	wild	Isolation	CHIROPTERA	PTEROPODIDAE	Pteropus	scapulatus	Mononegavirales	Rhabdoviridae	NA	Lyssavirus	11822	TRUE	FALSE	SS	RNA	enveloped	Calisher et al. 2006; Wong et al. 2007; Gould et al. 2002; Francis et al. 2014	Speare et al. 1997	100	380.35	1	179.76	136.875	97	18	0.692547	3	3	0.673767	0.881401	ssRNA(-)	1	direct_host
Australian_bat_lyssavirus	Pteropus_poliocephalus	1	1	4	saliva	100	100	1	encephalitis	1	low	Only three human cases - all have been fatal; infectious period ranges from 20-28 days	wild	Isolation	CHIROPTERA	PTEROPODIDAE	Pteropus	poliocephalus	Mononegavirales	Rhabdoviridae	NA	Lyssavirus	11822	TRUE	FALSE	SS	RNA	enveloped	Fraser et al. 1996; Speare et al. 1997; Francis et al. 2014; Field 2018	Mackenzie 1999; Gould et al. 2002; Wong et al. 2007	100	702.78	1	180	187.72	184	26	0.65216	4	5	0.673767	0.881401	ssRNA(-)	1	direct_host
Australian_bat_lyssavirus	Pteropus_alecto	1	1	4	saliva	100	100	1	encephalitis	1	low	Only three human cases - all have been fatal; bats are the only known reservoir (unlike rabies which has many other terrestrial reservoirs); prevalence of ABLV differs widely btw bat species (Weir et al. 2014. Recent observations on Australian bat lyssavirus tropism and viral entry)	wild	Isolation	CHIROPTERA	PTEROPODIDAE	Pteropus	alecto	Mononegavirales	Rhabdoviridae	NA	Lyssavirus	11822	TRUE	FALSE	SS	RNA	enveloped	Fraser et al. 1996; Speare et al. 1997; Francis et al. 2014; Field 2018	Speare et al. 1997	100	610.13	1	53.9999	177.517	92	24	0.6727	3	3	0.673767	0.881401	ssRNA(-)	1	direct_host
Australian_bat_lyssavirus	Pteropus_conspicillatus	1	1	4	saliva	100	100	1	encephalitis	1	low	Only three human cases - all have been fatal; infectious period ranges from 20-28 days	wild	Isolation	CHIROPTERA	PTEROPODIDAE	Pteropus	conspicillatus	Mononegavirales	Rhabdoviridae	NA	Lyssavirus	11822	TRUE	FALSE	SS	RNA	enveloped	Mackenzie 1999; Gould et al. 2002; Wong et al. 2007; Field et al. 1999; McColl et al. 2002; Francis et al. 2014; Field 2018; Samaratunga et al. 2002	Wong et al. 2007; Mackenzie et al. 2001	100	760.71	1	179.76	212.917	36	14	0.66417	3	3	0.673767	0.881401	ssRNA(-)	1	direct_host
Bayou_virus	Oryzomys_palustris	1	1	1	aerosolized excreta	20	20	1	hantavirus cardiopulmonary syndrome (HCPS)	1	high	5 lab confirmed cases, 1 death	wild	Isolation	RODENTIA	CRICETIDAE	Oryzomys	palustris	Bunyavirales	Hantaviridae	NA	Orthohantavirus	12155	TRUE	TRUE	SS	RNA	enveloped	Nugent et al. 2018; Knust and Rollin 2013; Morzunov et al. 1995	Ksiazek et al. 1997	20	53.26	4.08	28.5	24.74	210	53	0.80769	2	3	0.491804	0.80769	ssRNA(-)	1	direct_host
Black_Creek_Canal_virus	Sigmodon_hispidus	1	1	1	aerosolized excreta	0	0	1	hantavirus cardiopulmonary syndrome (HCPS)	1	high	There's only been one lab confirmed human case	wild	Isolation	RODENTIA	CRICETIDAE	Sigmodon	hispidus	Bunyavirales	Hantaviridae	NA	Orthohantavirus	15450	TRUE	TRUE	SS	RNA	enveloped	Knust and Rollin 2013	Rollin et al. 1995	0	110.65	5.44	62.4	27	887	268	0.801487	4	7	0	0.801487	ssRNA(-)	1	direct_host
Borna_disease_virus	Crocidura_leucodon	1	0	1	saliva, nasal excretia	0	0	1	reported psychiatric symptoms debated (largely debunked); encephalitis also posited	1	low	Shrew is thought to be the potential reservoir for horses and sheep, but there have also been stiuesi finding plenty of endemic infections in health horses and shepp too...Genotypes of horse-like borna found in humans but no transmission demonstrated outside of squirrel. Squirrel cases appear to be highly fatal (though note that all 4 patients were older and had pre-exisiting conditions). Horse t…	wild	PCR	EULIPOTYPHLA	SORICIDAE	Crocidura	leucodon	Mononegavirales	Bornaviridae	NA	Bornavirus	8910	FALSE	FALSE	SS	RNA	enveloped	Chare et al. 2003	Hilbe et al. 2006	0	10.88	3.36	36	30.99	242	39	0.849242	1	1	0.807757	0.849242	ssRNA(-)	1	reservoir_only
Borna_disease_virus	Vulpes_vulpes	1	0	1	saliva, nasal excretia	0	0	1	reported psychiatric symptoms debated (largely debunked); encephalitis also posited	1	low	Genotypes of horse-like borna found in humans but no transmission demonstrated outside of squirrel. Squirrel cases appear to be highly fatal (though note that all 4 patients were older and had pre-exisiting conditions). Horse transmission documented between humans through organ donation.	wild	PCR	CARNIVORA	CANIDAE	Vulpes	vulpes	Mononegavirales	Bornaviridae	NA	Bornavirus	8910	FALSE	FALSE	SS	RNA	enveloped	Chare et al. 2003	Dauphin et al. 2001	0	4820.36	4.59	180	52.5	4433	1477	0.773731	2	3	0.807757	0.849242	ssRNA(-)	1	reservoir_only
Borna_disease_virus	Macaca_fuscata	1	0	1	saliva, nasal excretia	0	0	1	reported psychiatric symptoms debated (largely debunked); encephalitis also posited	1	low	Genotypes of horse-like borna found in humans but no transmission demonstrated outside of squirrel. Squirrel cases appear to be highly fatal (though note that all 4 patients were older and had pre-exisiting conditions). Horse transmission documented between humans through organ donation.	wild	PCR	PRIMATES	CERCOPITHECIDAE	Macaca	fuscata	Mononegavirales	Bornaviridae	NA	Bornavirus	8910	FALSE	FALSE	SS	RNA	enveloped	Chare et al. 2003	Hagiwara et al. 2008	0	10114.8	1.02	396	172.99	1339	87	0.393434	4	5	0.807757	0.849242	ssRNA(-)	1	reservoir_only
Borna_disease_virus	Capra_hircus	1	0	1	saliva, nasal excretia	0	0	1	reported psychiatric symptoms debated (largely debunked); encephalitis also posited	1	low	Genotypes of horse-like borna found in humans but no transmission demonstrated outside of squirrel. Squirrel cases appear to be highly fatal (though note that all 4 patients were older and had pre-exisiting conditions). Horse transmission documented between humans through organ donation.	domestic	PCR	CETARTIODACTYLA	BOVIDAE	Capra	hircus	Mononegavirales	Bornaviridae	NA	Bornavirus	8910	FALSE	FALSE	SS	RNA	enveloped	Chare et al. 2003	Zhang et al. 2014	0	47386.5	1.45	249.6	156	1557	796	0.650447	5	18	0.807757	0.849242	ssRNA(-)	1	reservoir_only
Borna_disease_virus	Bos_taurus	1	0	1	saliva, nasal excretia	0	0	1	reported psychiatric symptoms debated (largely debunked); encephalitis also posited	1	low	Genotypes of horse-like borna found in humans but no transmission demonstrated outside of squirrel. Squirrel cases appear to be highly fatal (though note that all 4 patients were older and had pre-exisiting conditions). Horse transmission documented between humans through organ donation.	domestic	PCR	CETARTIODACTYLA	BOVIDAE	Bos	taurus	Mononegavirales	Bornaviridae	NA	Bornavirus	8910	FALSE	FALSE	SS	RNA	enveloped	Chare et al. 2003	Dauphin et al. 2001	0	618642	1	240	280.48	4238	2742	0.682652	11	46	0.807757	0.849242	ssRNA(-)	1	reservoir_only
Borna_disease_virus	Lama_glama	1	0	1	saliva, nasal excretia	0	0	1	reported psychiatric symptoms debated (largely debunked); encephalitis also posited	1	low	Genotypes of horse-like borna found in humans but no transmission demonstrated outside of squirrel. Squirrel cases appear to be highly fatal (though note that all 4 patients were older and had pre-exisiting conditions). Horse transmission documented between humans through organ donation.	wild	PCR	CETARTIODACTYLA	CAMELIDAE	Lama	pacos	Mononegavirales	Bornaviridae	NA	Bornavirus	8910	FALSE	FALSE	SS	RNA	enveloped	Chare et al. 2003	Jacobsen et al. 2010	0	78322.7	1	339.6	342.74	556	269	0.733792	0	1	0.807757	0.849242	ssRNA(-)	1	reservoir_only
Borna_disease_virus	Lynx_lynx	1	0	1	saliva, nasal excretia	0	0	1	reported psychiatric symptoms debated (largely debunked); encephalitis also posited	1	low	Genotypes of horse-like borna found in humans but no transmission demonstrated outside of squirrel. Squirrel cases appear to be highly fatal (though note that all 4 patients were older and had pre-exisiting conditions). Horse transmission documented between humans through organ donation.	wild	PCR	CARNIVORA	FELIDAE	Lynx	lynx	Mononegavirales	Bornaviridae	NA	Bornavirus	8910	FALSE	FALSE	SS	RNA	enveloped	Chare et al. 2003	Degiorgis et al. 2000	0	19300	2.3	321.6	66.99	1167	115	0.667043	1	2	0.807757	0.849242	ssRNA(-)	1	reservoir_only
Borna_disease_virus	Equus_caballus	1	1	2	saliva, nasal excretia	0	0	1	reported psychiatric symptoms debated (largely debunked); encephalitis also posited	1	low	Genotypes of horse-like borna found in humans but no transmission demonstrated outside of squirrel. Squirrel cases appear to be highly fatal (though note that all 4 patients were older and had pre-exisiting conditions). Horse transmission documented between humans through organ donation.	domestic	PCR	PERISSODACTYLA	EQUIDAE	Equus	caballus	Mononegavirales	Bornaviridae	NA	Bornavirus	8910	FALSE	FALSE	SS	RNA	enveloped	Chare et al. 2003	Dauphin et al. 2001	0	403599	1	744	338.97	2067	771	0.636988	5	23	0.807757	0.849242	ssRNA(-)	1	direct_host
Borna_disease_virus	Ovis_aries	1	0	2	saliva, nasal excretia	0	0	1	reported psychiatric symptoms debated (largely debunked); encephalitis also posited	1	low	Genotypes of horse-like borna found in humans but no transmission demonstrated outside of squirrel. Squirrel cases appear to be highly fatal (though note that all 4 patients were older and had pre-exisiting conditions). Horse transmission documented between humans through organ donation.	domestic	PCR	CETARTIODACTYLA	BOVIDAE	Ovis	aries	Mononegavirales	Bornaviridae	NA	Bornavirus	8910	FALSE	FALSE	SS	RNA	enveloped	Chare et al. 2003	Vahlenkamp et al. 2002	0	39097.9	1.19	230.04	152.54	3212	2019	0.745671	6	26	0.807757	0.849242	ssRNA(-)	1	reservoir_only
Borna_disease_virus	Sciurus_variegatoides	1	1	1	saliva, nasal excretia	0	0	1	reported psychiatric symptoms debated (largely debunked); encephalitis also posited	1	low	Genotypes of horse-like borna found in humans but no transmission demonstrated outside of squirrel. Squirrel cases appear to be highly fatal (though note that all 4 patients were older and had pre-exisiting conditions). Horse transmission documented between humans through organ donation.	domestic	PCR, metagenomics	RODENTIA	SCIURIDAE	Sciurus	variegatoides	Mononegavirales	Bornaviridae	NA	Bornavirus	8910	FALSE	FALSE	SS	RNA	enveloped	Chare et al. 2003	Chare et al. 2003	0	485	4.99	216	41.395	19	2	0.834235	1	1	0.807757	0.849242	ssRNA(-)	1	direct_host
Borna_disease_virus	Procyon_lotor	1	0	1	saliva, nasal excretia	0	0	1	reported psychiatric symptoms debated (largely debunked); encephalitis also posited	1	low	Genotypes of horse-like borna found in humans but no transmission demonstrated outside of squirrel. Squirrel cases appear to be highly fatal (though note that all 4 patients were older and had pre-exisiting conditions). Horse transmission documented between humans through organ donation.	wild	PCR	CARNIVORA	PROCYONIDAE	Procyon	lotor	Mononegavirales	Bornaviridae	NA	Bornavirus	8910	FALSE	FALSE	SS	RNA	enveloped	Chare et al. 2003	Hagiwara et al. 2009	0	6373.72	3.06	252	65	1699	655	0.753361	4	5	0.807757	0.849242	ssRNA(-)	1	reservoir_only
Borna_disease_virus	Equus_asinus	1	0	2	saliva, nasal excretia	0	0	1	reported psychiatric symptoms debated (largely debunked); encephalitis also posited	1	low	Genotypes of horse-like borna found in humans but no transmission demonstrated outside of squirrel. Squirrel cases appear to be highly fatal (though note that all 4 patients were older and had pre-exisiting conditions). Horse transmission documented between humans through organ donation.	domestic	PCR	PERISSODACTYLA	EQUIDAE	Equus	asinus	Mononegavirales	Bornaviridae	NA	Bornavirus	8910	FALSE	FALSE	SS	RNA	enveloped	Chare et al. 2003	Zhang et al. 2014	0	164998	1	564	367	470	127	0.626442	2	7	0.807757	0.849242	ssRNA(-)	1	reservoir_only
Borna_disease_virus	Canis_lupus	1	0	1	saliva, nasal excretia	0	0	1	reported psychiatric symptoms debated (largely debunked); encephalitis also posited	1	low	Genotypes of horse-like borna found in humans but no transmission demonstrated outside of squirrel. Squirrel cases appear to be highly fatal (though note that all 4 patients were older and had pre-exisiting conditions). Horse transmission documented between humans through organ donation.	domestic	PCR	CARNIVORA	CANIDAE	Canis	familiaris	Mononegavirales	Bornaviridae	NA	Bornavirus	8910	FALSE	FALSE	SS	RNA	enveloped	Chare et al. 2003	Zhang et al. 2014	0	31756.5	4.98	354	63.5	3742	345	0.772511	1	3	0.807757	0.849242	ssRNA(-)	1	reservoir_only
Borna_disease_virus	Oryctolagus_cuniculus	1	0	1	saliva, nasal excretia	0	0	1	reported psychiatric symptoms debated (largely debunked); encephalitis also posited	1	low	Genotypes of horse-like borna found in humans but no transmission demonstrated outside of squirrel. Squirrel cases appear to be highly fatal (though note that all 4 patients were older and had pre-exisiting conditions). Horse transmission documented between humans through organ donation.	domestic	PCR	LAGOMORPHA	LEPORIDAE	Oryctolagus	cuniculus	Mononegavirales	Bornaviridae	NA	Bornavirus	8910	FALSE	FALSE	SS	RNA	enveloped	Chare et al. 2003	Zhang et al. 2014	0	1590.57	5.24	216	30.45	3257	1259	0.722904	1	7	0.807757	0.849242	ssRNA(-)	1	reservoir_only
Borna_disease_virus	Sus_scrofa	1	0	1	saliva, nasal excretia	0	0	1	reported psychiatric symptoms debated (largely debunked); encephalitis also posited	1	low	Genotypes of horse-like borna found in humans but no transmission demonstrated outside of squirrel. Squirrel cases appear to be highly fatal (though note that all 4 patients were older and had pre-exisiting conditions). Horse transmission documented between humans through organ donation.	domestic	PCR	CETARTIODACTYLA	SUIDAE	Sus	scrofa	Mononegavirales	Bornaviridae	NA	Bornavirus	8910	FALSE	FALSE	SS	RNA	enveloped	Chare et al. 2003	Zhang et al. 2014	0	84471.5	4.52	252	115.2	3932	1671	0.67177	13	41	0.807757	0.849242	ssRNA(-)	1	reservoir_only
Bovine_papular_stomatitis_virus	Bos_taurus	1	1	3	contact with lesions	0	0	1	lesions	1	high	Proxied recombination rate from related parapoxvirus Orf virus (same genus)	domestic	PCR	CETARTIODACTYLA	BOVIDAE	Bos	taurus	Group_I	Poxviridae	Chordopoxvirinae	Parapoxvirus	134431	TRUE	FALSE	DS	DNA	enveloped	https://www.ncbi.nlm.nih.gov/pmc/articles/PMC1320068/pdf/compmed00023-0007.pdf; https://www.ncbi.nlm.nih.gov/pmc/articles/PMC1320068/pdf/compmed00023-0007.pdf	de Sant'Ana et al. 2012	0	618642	1	240	280.48	4238	2742	0.682652	11	46	0	0.682652	dsDNA	1	direct_host
Camelpox_virus	Camelus_dromedarius	1	1	3	contact with lesions or infected environment	0	0	1	lesions	1	high	Only three cases have been confirmed, but historically, there have been many suspecte cases	domestic	Isolation	CETARTIODACTYLA	CAMELIDAE	Camelus	dromedarius	Group_I	Poxviridae	Chordopoxvirinae	Orthopoxvirus	205719	TRUE	FALSE	DS	DNA	enveloped	Bera et al. 2011; Balamurugan et al. 2013; Babkin and Babkina 2015	Bera et al. 2011	0	492714	0.98	480	386.51	1262	364	0.766609	1	4	0	0.766609	dsDNA	1	direct_host
Cercopithecine_herpesvirus_1	Macaca_cyclopis	1	1	1	direct/indirect contact	80	80	1	encephalitis, severe neurological disease	1	high	Seroprevelance is quite high in Macaques (often ~80%), but there has only been 40 recorded human cases	wild	Isolation	PRIMATES	CERCOPITHECIDAE	Macaca	cyclopis	Herpesvirales	Herpesviridae	Alphaherpesvirinae	Simplexvirus	156789	FALSE	FALSE	DS	DNA	enveloped	Elmore and Eberle 2008; Huff and Barry 2009	Huff et al. 2003	80	5748.94	1	360	161.06	161	40	0.3835	2	2	0.231821	0.405899	dsDNA	1	direct_host
Cercopithecine_herpesvirus_1	Macaca_arctoides	1	1	1	direct/indirect contact	80	80	1	encephalitis, severe neurological disease	1	high	Seroprevelance is quite high in Macaques (often ~80%), but there has only been 40 recorded human cases	wild	Isolation	PRIMATES	CERCOPITHECIDAE	Macaca	arctoides	Herpesvirales	Herpesviridae	Alphaherpesvirinae	Simplexvirus	156789	FALSE	FALSE	DS	DNA	enveloped	Elmore and Eberle 2008; Huff and Barry 2008	Huff et al. 2003	80	9358.04	1.01	360	176.6	456	53	0.401324	2	2	0.231821	0.405899	dsDNA	1	direct_host
Cercopithecine_herpesvirus_1	Macaca_mulatta	1	1	1	direct/indirect contact	80	80	1	encephalitis, severe neurological disease	1	high	Seroprevelance is quite high in Macaques (often ~80%), but there has only been 40 recorded human cases	wild	Isolation	PRIMATES	CERCOPITHECIDAE	Macaca	mulatta	Herpesvirales	Herpesviridae	Alphaherpesvirinae	Simplexvirus	156789	FALSE	FALSE	DS	DNA	enveloped	Elmore and Eberle 2008; Huff and Barry 2006	Huff et al. 2003	80	6455.19	1.01	432	166.07	2471	386	0.387936	3	15	0.231821	0.405899	dsDNA	1	direct_host
Cercopithecine_herpesvirus_1	Macaca_radiata	1	1	1	direct/indirect contact	80	80	1	encephalitis, severe neurological disease	1	high	Seroprevelance is quite high in Macaques (often ~80%), but there has only been 40 recorded human cases	wild	Isolation	PRIMATES	CERCOPITHECIDAE	Macaca	radiata	Herpesvirales	Herpesviridae	Alphaherpesvirinae	Simplexvirus	156789	FALSE	FALSE	DS	DNA	enveloped	Elmore and Eberle 2008; Huff and Barry 2005	Huff et al. 2003	80	4999.99	1.01	360	161.56	447	71	0.355534	1	2	0.231821	0.405899	dsDNA	1	direct_host
Cercopithecine_herpesvirus_1	Macaca_fascicularis	1	1	1	direct/indirect contact	80	80	1	encephalitis, severe neurological disease	1	high	Seroprevelance is quite high in Macaques (often ~80%), but there has only been 40 recorded human cases	wild	Isolation	PRIMATES	CERCOPITHECIDAE	Macaca	fascicularis	Herpesvirales	Herpesviridae	Alphaherpesvirinae	Simplexvirus	156789	FALSE	FALSE	DS	DNA	enveloped	Elmore and Eberle 2008; Huff and Barry 2004	Huff et al. 2003	80	4569.32	1	456	164.69	1084	190	0.405899	4	11	0.231821	0.405899	dsDNA	1	direct_host
Cercopithecine_herpesvirus_1	Macaca_nemestrina	1	1	1	direct/indirect contact	80	80	1	encephalitis, severe neurological disease	1	high	Seroprevelance is quite high in Macaques (often ~80%), but there has only been 40 recorded human cases	wild	Isolation	PRIMATES	CERCOPITHECIDAE	Macaca	nemestrina	Herpesvirales	Herpesviridae	Alphaherpesvirinae	Simplexvirus	156789	FALSE	FALSE	DS	DNA	enveloped	Elmore and Eberle 2008; Huff and Barry 2007	Huff et al. 2003	80	7820.78	1.01	411.6	171	834	95	0.40282	1	3	0.231821	0.405899	dsDNA	1	direct_host
Cercopithecine_herpesvirus_1	Macaca_fuscata	1	1	1	direct/indirect contact	80	80	1	encephalitis, severe neurological disease	1	high	Seroprevelance is quite high in Macaques (often ~80%), but there has only been 40 recorded human cases	wild	Isolation	PRIMATES	CERCOPITHECIDAE	Macaca	fuscata	Herpesvirales	Herpesviridae	Alphaherpesvirinae	Simplexvirus	156789	FALSE	FALSE	DS	DNA	enveloped	Elmore and Eberle 2008; Huff and Barry 2003	Huff et al. 2003	80	10114.8	1.02	396	172.99	1339	87	0.393434	4	5	0.231821	0.405899	dsDNA	1	direct_host
Cowpox_virus	Castor_fiber	1	0	1	direct/indirect contact	0	0	1	lesions	1	high	Note that spillover frequency refers to historical spillover (pre-vaccine)	captive	PCR	RODENTIA	CASTORIDAE	Castor	fiber	Group_I	Poxviridae	Chordopoxvirinae	Orthopoxvirus	223026	TRUE	FALSE	DS	DNA	enveloped	Chantrey et al. 1999; Mauldin et al. 2021	Hentschke et al. 1999	0	19000	2.95	300	106.42	1397	85	0.608679	1	1	0.835917	0.83395	dsDNA	1	reservoir_only
Cowpox_virus	Apodemus_sylvaticus	1	0	1	direct/indirect contact	0	0	1	lesions	1	high	Note that spillover frequency refers to historical spillover (pre-vaccine)	wild	PCR	RODENTIA	MURIDAE	Apodemus	sylvaticus	Group_I	Poxviridae	Chordopoxvirinae	Orthopoxvirus	223026	TRUE	FALSE	DS	DNA	enveloped	Chantrey et al. 1999; Mauldin et al. 2024	Acha & Szyfres 2003; Chantrey et al. 1999	0	21.9	5.16	52.8	23.68	2278	581	0.733956	3	13	0.835917	0.83395	dsDNA	1	reservoir_only
Cowpox_virus	Myodes_glareolus	1	0	1	direct/indirect contact	0	0	1	lesions	1	high	Note that spillover frequency refers to historical spillover (pre-vaccine)	wild	PCR	RODENTIA	CRICETIDAE	Myodes	glareolus	Group_I	Poxviridae	Chordopoxvirinae	Orthopoxvirus	223026	TRUE	FALSE	DS	DNA	enveloped	Chantrey et al. 1999; Mauldin et al. 2029	Acha & Szyfres 2003; Chantrey et al. 1999	0	20.73	4.31	58.8	19.74	112	38	0.657799	5	10	0.835917	0.83395	dsDNA	1	reservoir_only
Cowpox_virus	Spermophilus_fulvus	1	0	1	direct/indirect contact	0	0	1	lesions	1	high	Note that spillover frequency refers to historical spillover (pre-vaccine)	wild	Isolation	RODENTIA	SCIURIDAE	Spermophilus	fulvus	Group_I	Poxviridae	Chordopoxvirinae	Orthopoxvirus	223026	TRUE	FALSE	DS	DNA	enveloped	Chantrey et al. 1999; Mauldin et al. 2023	Marennikova et al. 1979	0	778.38	5.99	60	30.41	98	19	0.82914	1	1	0.835917	0.83395	dsDNA	1	reservoir_only
Cowpox_virus	Microtus_oeconomus	1	0	1	direct/indirect contact	0	0	1	lesions	1	high	Note that spillover frequency refers to historical spillover (pre-vaccine)	wild	Isolation	RODENTIA	CRICETIDAE	Microtus	oeconomus	Group_I	Poxviridae	Chordopoxvirinae	Orthopoxvirus	223026	TRUE	FALSE	DS	DNA	enveloped	Chantrey et al. 1999; Mauldin et al. 2027	Lvov et al. 1988	0	33.1	5.62	21.6	21.51	839	114	0.720836	2	3	0.835917	0.83395	dsDNA	1	reservoir_only
Cowpox_virus	Rhombomys_opimus	1	0	1	direct/indirect contact	0	0	1	lesions	1	high	Note that spillover frequency refers to historical spillover (pre-vaccine)	wild	Isolation	RODENTIA	MURIDAE	Rhombomys	opimus	Group_I	Poxviridae	Chordopoxvirinae	Orthopoxvirus	223026	TRUE	FALSE	DS	DNA	enveloped	Chantrey et al. 1999; Mauldin et al. 2022	Marennikova et al. 1978	0	4.75	4.59	48	27.5	689	267	0.83395	1	1	0.835917	0.83395	dsDNA	1	reservoir_only
Cowpox_virus	Myodes_rutilus	1	0	1	direct/indirect contact	0	0	1	lesions	1	high	Note that spillover frequency refers to historical spillover (pre-vaccine)	wild	PCR	RODENTIA	CRICETIDAE	Myodes	rutilus	Group_I	Poxviridae	Chordopoxvirinae	Orthopoxvirus	223026	TRUE	FALSE	DS	DNA	enveloped	Chantrey et al. 1999; Mauldin et al. 2028	Tryland et al. 1998	0	19.94	5.6	41.4	23.98	36	9	0.6752	1	1	0.835917	0.83395	dsDNA	1	reservoir_only
Cowpox_virus	Felis_catus	2	1	3	direct/indirect contact	0	0	1	lesions	1	high	Note that spillover frequency refers to historical spillover (pre-vaccine);			CARNIVORA	FELIDAE	Felis	catus	Group_I	Poxviridae	Chordopoxvirinae	Orthopoxvirus	223026	TRUE	FALSE	DS	DNA	enveloped	Chantrey et al. 1999; Mauldin et al. 2018	Chantrey et al. 1999; Mauldin et al. 2017	0	2884.8	2.685	408	62.99	2495	1016	0.669865	4	14	0.835917	0.83395	dsDNA	1	int_host
Cowpox_virus	Bos_taurus	2	1	3	direct/indirect contact	0	0	1	lesions	1	high	Note that spillover frequency refers to historical spillover (pre-vaccine); cow spillover affected dairy farmers	domestic	PCR	CETARTIODACTYLA	BOVIDAE	Bos	taurus	Group_I	Poxviridae	Chordopoxvirinae	Orthopoxvirus	223026	TRUE	FALSE	DS	DNA	enveloped	Chantrey et al. 1999; Mauldin et al. 2017	Damaso et al. 2000	0	618642	1	240	280.48	4238	2742	0.682652	11	46	0.835917	0.83395	dsDNA	1	int_host
Cowpox_virus	Microtus_agrestis	1	0	1	direct/indirect contact	0	0	1	lesions	1	high	Note that spillover frequency refers to historical spillover (pre-vaccine)	wild	PCR	RODENTIA	CRICETIDAE	Microtus	agrestis	Group_I	Poxviridae	Chordopoxvirinae	Orthopoxvirus	223026	TRUE	FALSE	DS	DNA	enveloped	Chantrey et al. 1999; Mauldin et al. 2019	Acha & Szyfres 2003; Tryland et al. 1998	0	35.87	4.65	39.6	20.72	1548	223	0.722485	4	9	0.835917	0.83395	dsDNA	1	reservoir_only
Cowpox_virus	Rattus_norvegicus	1	1	1	direct/indirect contact	0	0	1	lesions	1	high	Note that spillover frequency refers to historical spillover (pre-vaccine); Spillover from rats has been due to contact with pet rats	wild	PCR	RODENTIA	MURIDAE	Rattus	norvegicus	Group_I	Poxviridae	Chordopoxvirinae	Orthopoxvirus	223026	TRUE	FALSE	DS	DNA	enveloped	Chantrey et al. 1999; Mauldin et al. 2026	Wolfs et al. 2002	0	282.89	8.99	50.4	21.74	3365	1198	0.662617	6	15	0.835917	0.83395	dsDNA	1	direct_host
Cowpox_virus	Myodes_rufocanus	1	0	1	direct/indirect contact	0	0	1	lesions	1	high	Note that spillover frequency refers to historical spillover (pre-vaccine)	wild	PCR	RODENTIA	CRICETIDAE	Myodes	rufocanus	Group_I	Poxviridae	Chordopoxvirinae	Orthopoxvirus	223026	TRUE	FALSE	DS	DNA	enveloped	Chantrey et al. 1999; Mauldin et al. 2025	Tryland et al. 1998	0	36.43	5.01	24	18	34	6	0.674	2	2	0.835917	0.83395	dsDNA	1	reservoir_only
Cowpox_virus	Meriones_libycus	1	0	1	direct/indirect contact	0	0	1	lesions	1	high	Note that spillover frequency refers to historical spillover (pre-vaccine)	wild	Isolation	RODENTIA	MURIDAE	Meriones	libycus	Group_I	Poxviridae	Chordopoxvirinae	Orthopoxvirus	223026	TRUE	FALSE	DS	DNA	enveloped	Chantrey et al. 1999; Mauldin et al. 2020	Tsanava et al. 1989	0	91.33	4.54	62.3999	25.43	217	68	0.802011	1	1	0.835917	0.83395	dsDNA	1	reservoir_only
Dobrava-Belgrade_virus	Apodemus_flavicollis	1	1	1	aerosolized excreta	12	12	1	hemorrhagic fever with renal syndrome (HFRS)	1	high		wild	Isolation	RODENTIA	MURIDAE	Apodemus	flavicollis	Bunyavirales	Hantaviridae	NA	Orthohantavirus	11851	TRUE	TRUE	SS	RNA	enveloped	Sibold et al. 2001; Papa 2012	Avsic-Zupanc et al. 1992	12	31.6	4.94	48	24.5	1330	335	0.6851	3	7	0.313151	0.699101	ssRNA(-)	1	direct_host
Dobrava-Belgrade_virus	Apodemus_agrarius	1	1	1	aerosolized excreta	12	12	1	hemorrhagic fever with renal syndrome (HFRS)	1	high		wild	Isolation	RODENTIA	MURIDAE	Apodemus	agrarius	Bunyavirales	Hantaviridae	NA	Orthohantavirus	11851	TRUE	TRUE	SS	RNA	enveloped	Sibold et al. 2001; Papa 2012	Plyusnin 2002	12	21.11	5.64	48	19.89	929	312	0.699101	3	3	0.313151	0.699101	ssRNA(-)	1	direct_host
Duvenhage_virus	Nycteris_thebaica	1	1	2	saliva	100	100	1	encephalitis	1	low	We were unable to find information on severity in bats; given the high seroprevalence found in bat populations (Markotter et al. 2013) and lack of evidence of clinical symptoms in bats, we do not expect this virus to be virulent in bats. Thus, we proxied the animal severity variable with European bat lyssavirus - another lyssavirus that is not virulent in bats.	wild	Isolation	CHIROPTERA	NYCTERIDAE	Nycteris	thebaica	Mononegavirales	Rhabdoviridae	NA	Lyssavirus	11976	TRUE	FALSE	SS	RNA	enveloped	Tignor et al. 1977; Markotter et al. 2013; van Thiel et al. 2008. Fatal case of human rabies (Duvenhage virus) from a bat in Kenya: The Netherlands, December 2009	Harris et aL. 2006	100	9.2	1	120	114.95	82	13	0.812792	1	1	0.755973	1.01033	ssRNA(-)	1	direct_host
Duvenhage_virus	Vespertilio_murinus	1	1	2	saliva	100	100	1	encephalitis	1	low	We were unable to find information on severity in bats; given the high seroprevalence found in bat populations (Markotter et al. 2013) and lack of evidence of clinical symptoms in bats, we do not expect this virus to be virulent in bats. Thus, we proxied the animal severity variable with European bat lyssavirus - another lyssavirus that is not virulent in bats.	wild	Isolation	CHIROPTERA	VESPERTILIONIDAE	Vespertilio	murinus	Mononegavirales	Rhabdoviridae	NA	Lyssavirus	11976	TRUE	FALSE	SS	RNA	enveloped	Tignor et al. 1977; Markotter et al. 2013; van Thiel et al. 2008. Fatal case of human rabies (Duvenhage virus) from a bat in Kenya: The Netherlands, December 2008	Calisher et al. 2006	100	15.42	1.5	144	52.14	281	24	1.01033	2	2	0.755973	1.01033	ssRNA(-)	1	direct_host
Duvenhage_virus	Nyctalus_noctula	1	1	2	saliva	100	100	1	encephalitis	1	low	We were unable to find information on severity in bats; given the high seroprevalence found in bat populations (Markotter et al. 2013) and lack of evidence of clinical symptoms in bats, we do not expect this virus to be virulent in bats. Thus, we proxied the animal severity variable with European bat lyssavirus - another lyssavirus that is not virulent in bats.	wild	Isolation	CHIROPTERA	VESPERTILIONIDAE	Nyctalus	noctula	Mononegavirales	Rhabdoviridae	NA	Lyssavirus	11976	TRUE	FALSE	SS	RNA	enveloped	Tignor et al. 1977; Markotter et al. 2013; van Thiel et al. 2008. Fatal case of human rabies (Duvenhage virus) from a bat in Kenya: The Netherlands, December 2007	Calisher et al. 2006	100	28.48	1.33	144	72.24	613	73	0.975537	3	4	0.755973	1.01033	ssRNA(-)	1	direct_host
Duvenhage_virus	Miniopterus_schreibersii	1	1	2	saliva	100	100	1	encephalitis	1	low	We were unable to find information on severity in bats; given the high seroprevalence found in bat populations (Markotter et al. 2013) and lack of evidence of clinical symptoms in bats, we do not expect this virus to be virulent in bats. Thus, we proxied the animal severity variable with European bat lyssavirus - another lyssavirus that is not virulent in bats.	wild	Isolation	CHIROPTERA	VESPERTILIONIDAE	Miniopterus	schreibersii	Mononegavirales	Rhabdoviridae	NA	Lyssavirus	11976	TRUE	FALSE	SS	RNA	enveloped	Tignor et al. 1977; Markotter et al. 2013; van Thiel et al. 2008. Fatal case of human rabies (Duvenhage virus) from a bat in Kenya: The Netherlands, December 2010	Calisher et al. 2006	100	11.46	0.99	168	182.5	279	47	0.783355	3	4	0.755973	1.01033	ssRNA(-)	1	direct_host
Encephalomyocarditis_virus	Mus_booduga	1	1	2	contact with fomites in food, water, and carcasses	0	0	1	febrile illness	1	high		wild	Isolation	RODENTIA	MURIDAE	Mus	booduga	Picornavirales	Picornaviridae	NA	Cardiovirus	7835	TRUE	FALSE	SS	RNA	non-enveloped	Carocci and Kassimi 2012; Oberste et al. 2015	Tesh and Wallace 1978	0	13.78	5.96	72	19.6	164	12	0.70604	1	1	1.11638	0.962807	ssRNA(+)	1	direct_host
Encephalomyocarditis_virus	Ichneumia_albicauda	2	0	4	contact with fomites in food, water, and carcasses	0	0	1	febrile illness	1	high		wild	Isolation	CARNIVORA	HERPESTIDAE	Ichneumia	albicauda	Picornavirales	Picornaviridae	NA	Cardiovirus	7835	TRUE	FALSE	SS	RNA	non-enveloped	Carocci and Kassimi 2012; Oberste et al. 2019	Tesh & Wallace 1978	0	3628.4	2.35	144	77	34	5	0.66891	2	2	1.11638	0.962807	ssRNA(+)	1	secondary_only
Encephalomyocarditis_virus	Didelphis_virginiana	2	0	4	contact with fomites in food, water, and carcasses	0	0	1	febrile illness	1	high		wild	Isolation	DIDELPHIMORPHIA	DIDELPHIDAE	Didelphis	virginiana	Picornavirales	Picornaviridae	NA	Cardiovirus	7835	TRUE	FALSE	SS	RNA	non-enveloped	Carocci and Kassimi 2012; Oberste et al. 2026	Smith et al. 1992	0	2442.08	8.62	60	12.69	1115	243	0.962807	1	1	1.11638	0.962807	ssRNA(+)	1	secondary_only
Encephalomyocarditis_virus	Bos_taurus	2	1	4	contact with fomites in food, water, and carcasses	0	0	1	febrile illness	1	high		domestic	Isolation	CETARTIODACTYLA	BOVIDAE	Bos	taurus	Picornavirales	Picornaviridae	NA	Cardiovirus	7835	TRUE	FALSE	SS	RNA	non-enveloped	Carocci and Kassimi 2012; Oberste et al. 2024	Tesh & Wallace 1978	0	618642	1	240	280.48	4238	2742	0.682652	11	46	1.11638	0.962807	ssRNA(+)	1	int_host
Encephalomyocarditis_virus	Loxodonta_africana	2	0	4	contact with fomites in food, water, and carcasses	0	0	1	febrile illness	1	high		wild	Isolation	PROBOSCIDEA	ELEPHANTIDAE	Loxodonta	africana	Picornavirales	Picornaviridae	NA	Cardiovirus	7835	TRUE	FALSE	SS	RNA	non-enveloped	Carocci and Kassimi 2012; Oberste et al. 2023	Tesh & Wallace 1978	0	3.82454e+06	0.84	960	660	2633	237	0.917875	1	2	1.11638	0.962807	ssRNA(+)	1	secondary_only
Encephalomyocarditis_virus	Macaca_mulatta	2	0	4	contact with fomites in food, water, and carcasses	0	0	1	febrile illness	1	high		wild	Isolation	PRIMATES	CERCOPITHECIDAE	Macaca	mulatta	Picornavirales	Picornaviridae	NA	Cardiovirus	7835	TRUE	FALSE	SS	RNA	non-enveloped	Carocci and Kassimi 2012; Oberste et al. 2018	Tesh & Wallace 1978	0	6455.19	1.01	432	166.07	2471	386	0.387936	3	15	1.11638	0.962807	ssRNA(+)	1	secondary_only
Encephalomyocarditis_virus	Mus_musculus	1	1	4	contact with fomites in food, water, and carcasses	0	0	1	febrile illness	1	high		domestic	Isolation	RODENTIA	MURIDAE	Mus	musculus	Picornavirales	Picornaviridae	NA	Cardiovirus	7835	TRUE	FALSE	SS	RNA	non-enveloped	Carocci and Kassimi 2012; Oberste et al. 2022	Jungeblut et al. 1943	0	19.3	5.54	72	19.6	6886	3196	0.726889	8	26	1.11638	0.962807	ssRNA(+)	1	direct_host
Encephalomyocarditis_virus	Pan_troglodytes	2	0	4	contact with fomites in food, water, and carcasses	0	0	1	febrile illness	1	high		wild	Isolation	PRIMATES	HOMINIDAE	Pan	troglodytes	Picornavirales	Picornaviridae	NA	Cardiovirus	7835	TRUE	FALSE	SS	RNA	non-enveloped	Carocci and Kassimi 2012; Oberste et al. 2021	Reddacliff et al. 1997	0	45000	1.05	720	231.49	3960	505	0.130389	10	20	1.11638	0.962807	ssRNA(+)	1	secondary_only
Encephalomyocarditis_virus	Sciurus_vulgaris	1	1	2	contact with fomites in food, water, and carcasses	0	0	1	febrile illness	1	high		wild	Isolation	RODENTIA	SCIURIDAE	Sciurus	vulgaris	Picornavirales	Picornaviridae	NA	Cardiovirus	7835	TRUE	FALSE	SS	RNA	non-enveloped	Carocci and Kassimi 2012; Oberste et al. 2009	Knowles et al. 1998	0	333	4.5	144	38	1056	164	0.80697	2	5	1.11638	0.962807	ssRNA(+)	1	direct_host
Encephalomyocarditis_virus	Saimiri_sciureus	2	0	4	contact with fomites in food, water, and carcasses	0	0	1	febrile illness	1	high		wild	Isolation	PRIMATES	CEBIDAE	Saimiri	sciureus	Picornavirales	Picornaviridae	NA	Cardiovirus	7835	TRUE	FALSE	SS	RNA	non-enveloped	Carocci and Kassimi 2012; Oberste et al. 2011	Roca-Garcia 1957	0	749.47	1	324	164.09	723	146	0.613822	2	5	1.11638	0.962807	ssRNA(+)	1	secondary_only
Encephalomyocarditis_virus	Sus_scrofa	2	1	4	contact with fomites in food, water, and carcasses	0	0	1	febrile illness	1	high	Causes reproductive disease in pigs	domestic	Isolation	CETARTIODACTYLA	SUIDAE	Sus	scrofa	Picornavirales	Picornaviridae	NA	Cardiovirus	7835	TRUE	FALSE	SS	RNA	non-enveloped	Carocci and Kassimi 2012; Oberste et al. 2016	Tesh and Wallace 1978	0	84471.5	4.52	252	115.2	3932	1671	0.67177	13	41	1.11638	0.962807	ssRNA(+)	1	int_host
Encephalomyocarditis_virus	Sigmodon_hispidus	1	1	2	contact with fomites in food, water, and carcasses	0	0	1	febrile illness	1	high		wild	Isolation	RODENTIA	CRICETIDAE	Sigmodon	hispidus	Picornavirales	Picornaviridae	NA	Cardiovirus	7835	TRUE	FALSE	SS	RNA	non-enveloped	Carocci and Kassimi 2012; Oberste et al. 2014	Tesh & Wallace 1978	0	110.65	5.44	62.4	27	887	268	0.801487	4	7	1.11638	0.962807	ssRNA(+)	1	direct_host
Encephalomyocarditis_virus	Procyon_lotor	2	0	4	contact with fomites in food, water, and carcasses	0	0	1	febrile illness	1	high		wild	Isolation	CARNIVORA	PROCYONIDAE	Procyon	lotor	Picornavirales	Picornaviridae	NA	Cardiovirus	7835	TRUE	FALSE	SS	RNA	non-enveloped	Carocci and Kassimi 2012; Oberste et al. 2020	Tesh & Wallace 1978	0	6373.72	3.06	252	65	1699	655	0.753361	4	5	1.11638	0.962807	ssRNA(+)	1	secondary_only
Encephalomyocarditis_virus	Sciurus_carolinensis	1	1	2	contact with fomites in food, water, and carcasses	0	0	1	febrile illness	1	high		wild	Isolation	RODENTIA	SCIURIDAE	Sciurus	carolinensis	Picornavirales	Picornaviridae	NA	Cardiovirus	7835	TRUE	FALSE	SS	RNA	non-enveloped	Carocci and Kassimi 2012; Oberste et al. 2017	Vizoso and Hay 1965	0	545.4	2.98	288	44.79	1025	196	0.845733	3	10	1.11638	0.962807	ssRNA(+)	1	direct_host
Encephalomyocarditis_virus	Hydromys_chrysogaster	1	1	2	contact with fomites in food, water, and carcasses	0	0	1	febrile illness	1	high		wild	Isolation	RODENTIA	MURIDAE	Hydromys	chrysogaster	Picornavirales	Picornaviridae	NA	Cardiovirus	7835	TRUE	FALSE	SS	RNA	non-enveloped	Carocci and Kassimi 2012; Oberste et al. 2010	Tesh and Wallace 1978	0	626.17	3.51	74	36.6	111	42	0.726512	1	1	1.11638	0.962807	ssRNA(+)	1	direct_host
Encephalomyocarditis_virus	Aotus_trivirgatus	2	0	4	contact with fomites in food, water, and carcasses	0	0	1	febrile illness	1	high		wild	Isolation	PRIMATES	AOTIDAE	Aotus	trivirgatus	Picornavirales	Picornaviridae	NA	Cardiovirus	7835	TRUE	FALSE	SS	RNA	non-enveloped	Carocci and Kassimi 2012; Oberste et al. 2027	Roca-Garcia 1957	0	912.4	1.06	303.6	133.47	574	219	0.505229	1	6	1.11638	0.962807	ssRNA(+)	1	secondary_only
Encephalomyocarditis_virus	Equus_caballus	2	1	4	contact with fomites in food, water, and carcasses	0	0	1	febrile illness	1	high		domestic	Isolation	PERISSODACTYLA	EQUIDAE	Equus	caballus	Picornavirales	Picornaviridae	NA	Cardiovirus	7835	TRUE	FALSE	SS	RNA	non-enveloped	Carocci and Kassimi 2012; Oberste et al. 2025	Tesh & Wallace 1978	0	403599	1	744	338.97	2067	771	0.636988	5	23	1.11638	0.962807	ssRNA(+)	1	int_host
Encephalomyocarditis_virus	Rattus_rattus	1	1	1	contact with fomites in food, water, and carcasses	0	0	1	febrile illness	1	high	Rodents are thought to be the natural reservoir, but rats are specifically believed to be the primary reservoir	domestic	Isolation	RODENTIA	MURIDAE	Rattus	rattus	Picornavirales	Picornaviridae	NA	Cardiovirus	7835	TRUE	FALSE	SS	RNA	non-enveloped	Carocci and Kassimi 2012; Oberste et al. 2012	Tesh & Wallace 1978	0	142.68	5.88	50.4	23.45	3004	1193	0.664981	5	11	1.11638	0.962807	ssRNA(+)	1	direct_host
Encephalomyocarditis_virus	Proechimys_guyannensis	1	1	2	contact with fomites in food, water, and carcasses	0	0	1	febrile illness	1	high		wild	Isolation	RODENTIA	ECHIMYIDAE	Proechimys	guyannensis	Picornavirales	Picornaviridae	NA	Cardiovirus	7835	TRUE	FALSE	SS	RNA	non-enveloped	Carocci and Kassimi 2012; Oberste et al. 2013	Tesh & Wallace 1978	0	314.03	2.16	57.6	63.41	53	29	0.824676	1	1	1.11638	0.962807	ssRNA(+)	1	direct_host
Encephalomyocarditis_virus	Glis_glis	1	1	2	contact with fomites in food, water, and carcasses	0	0	1	febrile illness	1	high		wild	Isolation	RODENTIA	GLIRIDAE	Glis	glis	Picornavirales	Picornaviridae	NA	Cardiovirus	7835	TRUE	FALSE	SS	RNA	non-enveloped	Carocci and Kassimi 2012; Oberste et al. 2028	Amaddeo et al. 1995	0	128.09	5.17	108	28.19	552	38	0.768022	1	1	1.11638	0.962807	ssRNA(+)	1	direct_host
European_bat_lyssavirus_1	Vespertilio_murinus	1	1	2	saliva	100	100	1	encephalitis	1	low	Only two human cases (1977, 1985) - both fatal; most isolates are EBLV type 1, type 2 less common (also sounds like EBLV-2 is more virulent - maybe that's part of the reason why it's less common?)	wild	Isolation	CHIROPTERA	VESPERTILIONIDAE	Vespertilio	murinus	Mononegavirales	Rhabdoviridae	NA	Lyssavirus	11966	TRUE	FALSE	SS	RNA	enveloped	Fooks et al. 2003; Serra-Cobo et al. 2013	Fooks et al. 2003	100	15.42	1.5	144	52.14	281	24	1.01033	2	2	0.802136	1.01033	ssRNA(-)	1	direct_host
European_bat_lyssavirus_1	Myotis_daubentonii	1	1	2	saliva	100	100	1	encephalitis	1	low	Only two human cases (1977, 1985) - both fatal; most isolates are EBLV type 1, type 2 less common (also sounds like EBLV-2 is more virulent - maybe that's part of the reason why it's less common?)	wild	Isolation	CHIROPTERA	VESPERTILIONIDAE	Myotis	daubentonii	Mononegavirales	Rhabdoviridae	NA	Lyssavirus	11966	TRUE	FALSE	SS	RNA	enveloped	Fooks et al. 2003; Serra-Cobo et al. 2002; Serra-Cobo et al. 2013	Muller et al. 2004	100	7.63	1.21	336	55.14	395	33	0.890322	3	3	0.802136	1.01033	ssRNA(-)	1	direct_host
European_bat_lyssavirus_1	Myotis_nattereri	1	1	2	saliva	100	100	1	encephalitis	1	low	Only two human cases (1977, 1985) - both fatal; most isolates are EBLV type 1, type 2 less common (also sounds like EBLV-2 is more virulent - maybe that's part of the reason why it's less common?)	wild	PCR	CHIROPTERA	VESPERTILIONIDAE	Myotis	nattereri	Mononegavirales	Rhabdoviridae	NA	Lyssavirus	11966	TRUE	FALSE	SS	RNA	enveloped	Fooks et al. 2003; Serra-Cobo et al. 2002; Serra-Cobo et al. 2013	Serra-Cobo et al. 2002	100	7.25	0.99	180	61.95	414	29	0.898515	2	2	0.802136	1.01033	ssRNA(-)	1	direct_host
European_bat_lyssavirus_1	Eptesicus_serotinus	1	1	2	saliva	100	100	1	encephalitis	1	low	Only two human cases (1977, 1985) - both fatal; most isolates are EBLV type 1, type 2 less common (also sounds like EBLV-2 is more virulent - maybe that's part of the reason why it's less common?)	wild	Isolation	CHIROPTERA	VESPERTILIONIDAE	Eptesicus	serotinus	Mononegavirales	Rhabdoviridae	NA	Lyssavirus	11966	TRUE	FALSE	SS	RNA	enveloped	Speare et al. 1997; Robardet et al. 2017; Vazquez-Moron et al. 2008; Serra-Cobo et al. 2013	Calisher et al. 2006	100	23.09	1.5	72	65.44	460	72	0.912204	2	2	0.802136	1.01033	ssRNA(-)	1	direct_host
European_bat_lyssavirus_1	Nyctalus_noctula	1	1	2	saliva	100	100	1	encephalitis	1	low	Only two human cases (1977, 1985) - both fatal; most isolates are EBLV type 1, type 2 less common (also sounds like EBLV-2 is more virulent - maybe that's part of the reason why it's less common?)	wild	Isolation	CHIROPTERA	VESPERTILIONIDAE	Nyctalus	noctula	Mononegavirales	Rhabdoviridae	NA	Lyssavirus	11966	TRUE	FALSE	SS	RNA	enveloped	Fooks et al. 2003; Serra-Cobo et al. 2002; Serra-Cobo et al. 2013	Muller et al. 2007	100	28.48	1.33	144	72.24	613	73	0.975537	3	4	0.802136	1.01033	ssRNA(-)	1	direct_host
European_bat_lyssavirus_1	Plecotus_auritus	1	1	2	saliva	100	100	1	encephalitis	1	low	Only two human cases (1977, 1985) - both fatal; most isolates are EBLV type 1, type 2 less common (also sounds like EBLV-2 is more virulent - maybe that's part of the reason why it's less common?)	wild	Isolation	CHIROPTERA	VESPERTILIONIDAE	Plecotus	auritus	Mononegavirales	Rhabdoviridae	NA	Lyssavirus	11966	TRUE	FALSE	SS	RNA	enveloped	Fooks et al. 2003; Serra-Cobo et al. 2013	Muller et al. 2004	100	8.19	1.22	360	65.12	649	52	0.898572	1	1	0.802136	1.01033	ssRNA(-)	1	direct_host
European_bat_lyssavirus_1	Myotis_dasycneme	1	1	2	saliva	100	100	1	encephalitis	1	low	Only two human cases (1977, 1985) - both fatal; most isolates are EBLV type 1, type 2 less common (also sounds like EBLV-2 is more virulent - maybe that's part of the reason why it's less common?)	wild	Isolation	CHIROPTERA	VESPERTILIONIDAE	Myotis	dasycneme	Mononegavirales	Rhabdoviridae	NA	Lyssavirus	11966	TRUE	FALSE	SS	RNA	enveloped	Fooks et al. 2003; Serra-Cobo et al. 2013	Muller et al. 2004	100	15.16	1	234	61.95	218	32	0.908697	2	2	0.802136	1.01033	ssRNA(-)	1	direct_host
European_bat_lyssavirus_1	Barbastella_barbastellus	1	1	2	saliva	100	100	1	encephalitis	1	low	Only two human cases (1977, 1985) - both fatal; most isolates are EBLV type 1, type 2 less common (also sounds like EBLV-2 is more virulent - maybe that's part of the reason why it's less common?)	wild	PCR	CHIROPTERA	VESPERTILIONIDAE	Barbastella	barbastellus	Mononegavirales	Rhabdoviridae	NA	Lyssavirus	11966	TRUE	FALSE	SS	RNA	enveloped	Fooks et al. 2003; Serra-Cobo et al. 2013	Muller unpublished in Muller et al. 2007	100	8.31	1.73	252	53.55	332	26	0.882913	1	1	0.802136	1.01033	ssRNA(-)	1	direct_host
European_bat_lyssavirus_1	Miniopterus_schreibersii	1	1	2	saliva	100	100	1	encephalitis	1	low	Only two human cases (1977, 1985) - both fatal; most isolates are EBLV type 1, type 2 less common (also sounds like EBLV-2 is more virulent - maybe that's part of the reason why it's less common?)	wild	PCR	CHIROPTERA	VESPERTILIONIDAE	Miniopterus	schreibersii	Mononegavirales	Rhabdoviridae	NA	Lyssavirus	11966	TRUE	FALSE	SS	RNA	enveloped	Fooks et al. 2003; Serra-Cobo et al. 2002; Serra-Cobo et al. 2013	Serra-Cobo et al. 2002	100	11.46	0.99	168	182.5	279	47	0.783355	3	4	0.802136	1.01033	ssRNA(-)	1	direct_host
European_bat_lyssavirus_1	Rousettus_aegyptiacus	1	1	2	saliva	100	100	1	encephalitis	1	low	Only two human cases (1977, 1985) - both fatal; most isolates are EBLV type 1, type 2 less common (also sounds like EBLV-2 is more virulent - maybe that's part of the reason why it's less common?)	wild	Isolation	CHIROPTERA	PTEROPODIDAE	Rousettus	aegyptiacus	Mononegavirales	Rhabdoviridae	NA	Lyssavirus	11966	TRUE	FALSE	SS	RNA	enveloped	Fooks et al. 2003; Wellenberg et al. 2002; Serra-Cobo et al. 2013	Calisher et al. 2006	100	134	1.07	274.8	123.39	258	47	0.705804	4	5	0.802136	1.01033	ssRNA(-)	1	direct_host
European_bat_lyssavirus_1	Rhinolophus_ferrumequinum	1	1	2	saliva	100	100	1	encephalitis	1	low	Only two human cases (1977, 1985) - both fatal; most isolates are EBLV type 1, type 2 less common (also sounds like EBLV-2 is more virulent - maybe that's part of the reason why it's less common?) There have been 1183 bat cases of EBLV-1 btw 1977 and 2016, but only 39 suspected cases of EBLV-2	wild	PCR	CHIROPTERA	RHINOLOPHIDAE	Rhinolophus	ferrumequinum	Mononegavirales	Rhabdoviridae	NA	Lyssavirus	11966	TRUE	FALSE	SS	RNA	enveloped	Wong et al. 2007; Mackenzie et al. 2001; Field 2004; Serra-Cobo et al. 2002; Serra-Cobo et al. 2013	Serra-Cobo et al. 2002	100	22.59	0.98	360	91.24	782	121	0.678446	6	6	0.802136	1.01033	ssRNA(-)	1	direct_host
European_bat_lyssavirus_1	Myotis_myotis	1	1	2	saliva	100	100	1	encephalitis	1	low	Only two human cases (1977, 1985) - both fatal; most isolates are EBLV type 1, type 2 less common (also sounds like EBLV-2 is more virulent - maybe that's part of the reason why it's less common?)	wild	PCR	CHIROPTERA	VESPERTILIONIDAE	Myotis	myotis	Mononegavirales	Rhabdoviridae	NA	Lyssavirus	11966	TRUE	FALSE	SS	RNA	enveloped	Fooks et al. 2003; Serra-Cobo et al. 2002; Serra-Cobo et al. 2013	Serra-Cobo et al. 2002	100	25.59	1.5	264	73	862	94	0.881878	2	2	0.802136	1.01033	ssRNA(-)	1	direct_host
European_bat_lyssavirus_1	Pipistrellus_nathusii	1	1	2	saliva	100	100	1	encephalitis	1	low	Only two human cases (1977, 1985) - both fatal; most isolates are EBLV type 1, type 2 less common (also sounds like EBLV-2 is more virulent - maybe that's part of the reason why it's less common?)	wild	Isolation	CHIROPTERA	VESPERTILIONIDAE	Pipistrellus	nathusii	Mononegavirales	Rhabdoviridae	NA	Lyssavirus	11966	TRUE	FALSE	SS	RNA	enveloped	Fooks et al. 2003; Serra-Cobo et al. 2013	Muller et al. 2007; Kuzmin & Rupprecht 1999	100	7.44	1.73	96	43.237	317	8	0.963116	1	1	0.802136	1.01033	ssRNA(-)	1	direct_host
European_bat_lyssavirus_1	Pipistrellus_pipistrellus	1	1	2	saliva	100	100	1	encephalitis	1	low	Only two human cases (1977, 1985) - both fatal; most isolates are EBLV type 1, type 2 less common (also sounds like EBLV-2 is more virulent - maybe that's part of the reason why it's less common?)	wild	Isolation	CHIROPTERA	VESPERTILIONIDAE	Pipistrellus	pipistrellus	Mononegavirales	Rhabdoviridae	NA	Lyssavirus	11966	TRUE	FALSE	SS	RNA	enveloped	Fooks et al. 2003; Serra-Cobo et al. 2013	Muller et al. 2007	100	5.3	1.37	200.4	44	818	83	0.992528	1	1	0.802136	1.01033	ssRNA(-)	1	direct_host
European_bat_lyssavirus_2	Myotis_nattereri	1	1	2	saliva	100	100	1	encephalitis	1	low	Only two human cases - both fatal (1985, 2002)	wild	Isolation	CHIROPTERA	VESPERTILIONIDAE	Myotis	nattereri	Mononegavirales	Rhabdoviridae	NA	Lyssavirus	11966	TRUE	FALSE	SS	RNA	enveloped	Fooks et al. 2003; Serra-Cobo et al. 2013	Calisher et al. 2006	100	7.25	0.99	180	61.95	414	29	0.898515	2	2	0.691746	0.975537	ssRNA(-)	1	direct_host
European_bat_lyssavirus_2	Rhinolophus_ferrumequinum	1	1	2	saliva	100	100	1	encephalitis	1	low	Only two human cases - both fatal (1985, 2002)	wild	Isolation	CHIROPTERA	RHINOLOPHIDAE	Rhinolophus	ferrumequinum	Mononegavirales	Rhabdoviridae	NA	Lyssavirus	11966	TRUE	FALSE	SS	RNA	enveloped	Fooks et al. 2003; Serra-Cobo et al. 2013	Calisher et al. 2006	100	22.59	0.98	360	91.24	782	121	0.678446	6	6	0.691746	0.975537	ssRNA(-)	1	direct_host
European_bat_lyssavirus_2	Myotis_myotis	1	1	2	saliva	100	100	1	encephalitis	1	low	Only two human cases - both fatal (1985, 2002)	wild	Isolation	CHIROPTERA	VESPERTILIONIDAE	Myotis	myotis	Mononegavirales	Rhabdoviridae	NA	Lyssavirus	11966	TRUE	FALSE	SS	RNA	enveloped	Fooks et al. 2003; Serra-Cobo et al. 2013	Calisher et al. 2006	100	25.59	1.5	264	73	862	94	0.881878	2	2	0.691746	0.975537	ssRNA(-)	1	direct_host
European_bat_lyssavirus_2	Nyctalus_noctula	1	1	2	saliva	100	100	1	encephalitis	1	low	Only two human cases - both fatal (1985, 2002)	wild	Isolation	CHIROPTERA	VESPERTILIONIDAE	Nyctalus	noctula	Mononegavirales	Rhabdoviridae	NA	Lyssavirus	11966	TRUE	FALSE	SS	RNA	enveloped	Fooks et al. 2003; Serra-Cobo et al. 2013	Kuzmin & Rupprecht 1999	100	28.48	1.33	144	72.24	613	73	0.975537	3	4	0.691746	0.975537	ssRNA(-)	1	direct_host
European_bat_lyssavirus_2	Myotis_dasycneme	1	1	2	saliva	100	100	1	encephalitis	1	low	Only two human cases - both fatal (1985, 2002)	wild	Isolation	CHIROPTERA	VESPERTILIONIDAE	Myotis	dasycneme	Mononegavirales	Rhabdoviridae	NA	Lyssavirus	11966	TRUE	FALSE	SS	RNA	enveloped	Fooks et al. 2003; Serra-Cobo et al. 2013	Calisher et al. 2006	100	15.16	1	234	61.95	218	32	0.908697	2	2	0.691746	0.975537	ssRNA(-)	1	direct_host
European_bat_lyssavirus_2	Myotis_daubentonii	1	1	2	saliva	100	100	1	encephalitis	1	low	Only two human cases - both fatal (1985, 2002)	wild	Isolation	CHIROPTERA	VESPERTILIONIDAE	Myotis	daubentonii	Mononegavirales	Rhabdoviridae	NA	Lyssavirus	11966	TRUE	FALSE	SS	RNA	enveloped	Fooks et al. 2003; Serra-Cobo et al. 2013	Calisher et al. 2006	100	7.63	1.21	336	55.14	395	33	0.890322	3	3	0.691746	0.975537	ssRNA(-)	1	direct_host
European_bat_lyssavirus_2	Miniopterus_schreibersii	1	1	2	saliva	100	100	1	encephalitis	1	low	Only two human cases - both fatal (1985, 2002)	wild	Isolation	CHIROPTERA	VESPERTILIONIDAE	Miniopterus	schreibersii	Mononegavirales	Rhabdoviridae	NA	Lyssavirus	11966	TRUE	FALSE	SS	RNA	enveloped	Fooks et al. 2003; Serra-Cobo et al. 2013	Calisher et al. 2006	100	11.46	0.99	168	182.5	279	47	0.783355	3	4	0.691746	0.975537	ssRNA(-)	1	direct_host
Flexal_virus	Hylaeamys_megacephalus	1	1	1	aerosolized excreta	0	0	1	febrile illness	1	high	Only 2 lab confirmed human cases - in laboratory workers, caused relatively severe disease	wild	Isolation	RODENTIA	CRICETIDAE	Hylaeamys	megacephalus	Group_V	Arenaviridae	NA	Arenavirus	10448	TRUE	TRUE	SS	RNA	enveloped	The Center for Food Security and Public Health 2010; Archer and Hesse 2002	Gonzalez et al. 2007	0	57	3.72	45	27.28	4	1	0.802303	1	3	0.303139	0.819167	ssRNA(+/-)	1	direct_host
Flexal_virus	Nephelomys_albigularis	1	1	1	aerosolized excreta	0	0	1	febrile illness	1	high	Only 2 lab confirmed human cases - in laboratory workers, caused relatively severe disease	wild	Isolation	RODENTIA	CRICETIDAE	Nephelomys	albigularis	Group_V	Arenaviridae	NA	Arenavirus	10448	TRUE	TRUE	SS	RNA	enveloped	The Center for Food Security and Public Health 2010; Archer and Hesse 2002	Gonzalez et al. 2007	0	60.5	3.4	5	26.7	3	1	0.819167	1	2	0.303139	0.819167	ssRNA(+/-)	1	direct_host
Flexal_virus	Oecomys_bicolor	1	1	1	aerosolized excreta	0	0	1	febrile illness	1	high	Only 2 lab confirmed human cases - in laboratory workers, caused relatively severe disease	wild	Isolation	RODENTIA	CRICETIDAE	Oecomys	bicolor	Group_V	Arenaviridae	NA	Arenavirus	10448	TRUE	TRUE	SS	RNA	enveloped	The Center for Food Security and Public Health 2010; Archer and Hesse 2002	CDC ArboCat	0	40.74	3.15	11	21.4	19	1	0.776922	1	2	0.303139	0.819167	ssRNA(+/-)	1	direct_host
Flexal_virus	Sooretamys_angouya	1	1	1	aerosolized excreta	0	0	1	febrile illness	1	high	Only 2 lab confirmed human cases - in laboratory workers, caused relatively severe disease	wild	Isolation	RODENTIA	CRICETIDAE	Sooretamys	angouya	Group_V	Arenaviridae	NA	Arenavirus	10448	TRUE	TRUE	SS	RNA	enveloped	The Center for Food Security and Public Health 2010; Archer and Hesse 2002	Gonzalez et al. 2007	0	120.17	4.08	28.5	24.74	10	2	0.815507	2	4	0.303139	0.819167	ssRNA(+/-)	1	direct_host
Guanarito_virus	Sigmodon_alstoni	1	1	1	aerosolized excreta	30	30	1	hemorrhagic fever	1	high	Venezuelan hemorrhagic fever	wild	Isolation	RODENTIA	CRICETIDAE	Sigmodon	alstoni	Group_V	Arenaviridae	NA	Arenavirus	10424	TRUE	TRUE	SS	RNA	enveloped	Manzione et al. 1998; Milazzo et al. 2011	Gonzalez et al. 2007	30	55.7	5.18	62.4	27	20	5	0.790313	1	3	0.480691	0.858466	ssRNA(+/-)	1	direct_host
Guanarito_virus	Zygodontomys_brevicauda	1	1	1	aerosolized excreta	30	30	1	hemorrhagic fever	1	high	Venezuelan hemorrhagic fever	wild	Isolation	RODENTIA	CRICETIDAE	Zygodontomys	brevicauda	Group_V	Arenaviridae	NA	Arenavirus	10424	TRUE	TRUE	SS	RNA	enveloped	Manzione et al. 1998; Milazzo et al. 2011	Fulhorst et al. 2001	30	52.22	4.23	12	25.39	44	20	0.858466	2	5	0.480691	0.858466	ssRNA(+/-)	1	direct_host
Hantaan_virus	Apodemus_peninsulae	1	1	1	aerosolized excreta, or saliva (via bite)	5	15	1	thrombocytopenia, hemorrhagic fever with renal syndrome (HFRS)	1	high	Apodemus_agrarius is considered the primary reservoir; some evidence that rate of subclinical cases/mild disease is higher in local population (constant exposure) vs. foreigners/soldiers; can remain viable in the environment for 2-3 days	wild	Isolation	RODENTIA	MURIDAE	Apodemus	peninsulae	Bunyavirales	Hantaviridae	NA	Orthohantavirus	11845	TRUE	TRUE	SS	RNA	enveloped	Ermonval et al. 2016; Song et al. 2006; https://www.cdc.gov/mmwr/preview/mmwrhtml/00051521.htm; Klein et al. 2015	Wang et al. 2000	10	2	4.41	52.79	22.69	183	53	0.7344	1	1	0.872881	0.912204	ssRNA(-)	1	direct_host
Hantaan_virus	Apodemus_agrarius	1	1	1	aerosolized excreta, or saliva (via bite)	5	15	1	thrombocytopenia, hemorrhagic fever with renal syndrome (HFRS)	1	high	Apodemus_agrarius is considered the primary reservoir; some evidence that rate of subclinical cases/mild disease is higher in local population (constant exposure) vs. foreigners/soldiers; can remain viable in the environment for 2-3 days	wild	Isolation	RODENTIA	MURIDAE	Apodemus	agrarius	Bunyavirales	Hantaviridae	NA	Orthohantavirus	11845	TRUE	TRUE	SS	RNA	enveloped	Ermonval et al. 2016; Song et al. 2006; https://www.cdc.gov/mmwr/preview/mmwrhtml/00051521.htm; Klein et al. 2015	Acha & Szyfres 2003; Lee et al. 1978	10	21.11	5.64	48	19.89	929	312	0.699101	3	3	0.872881	0.912204	ssRNA(-)	1	direct_host
Hantaan_virus	Rhinolophus_ferrumequinum	1	0	1	aerosolized excreta, or saliva (via bite)	5	15	1	thrombocytopenia, hemorrhagic fever with renal syndrome (HFRS)	1	high	Apodemus_agrarius is considered the primary reservoir; some evidence that rate of subclinical cases/mild disease is higher in local population (constant exposure) vs. foreigners/soldiers; can remain viable in the environment for 2-3 days	wild	Isolation	CHIROPTERA	RHINOLOPHIDAE	Rhinolophus	ferrumequinum	Bunyavirales	Hantaviridae	NA	Orthohantavirus	11845	TRUE	TRUE	SS	RNA	enveloped	Ermonval et al. 2016; Song et al. 2006; https://www.cdc.gov/mmwr/preview/mmwrhtml/00051521.htm; Klein et al. 2015	Kim et al. 1994	10	22.59	0.98	360	91.24	782	121	0.678446	6	6	0.872881	0.912204	ssRNA(-)	1	reservoir_only
Hantaan_virus	Eptesicus_serotinus	1	0	1	aerosolized excreta, or saliva (via bite)	5	15	1	thrombocytopenia, hemorrhagic fever with renal syndrome (HFRS)	1	high	Apodemus_agrarius is considered the primary reservoir; some evidence that rate of subclinical cases/mild disease is higher in local population (constant exposure) vs. foreigners/soldiers; can remain viable in the environment for 2-3 days	wild	Isolation	CHIROPTERA	VESPERTILIONIDAE	Eptesicus	serotinus	Bunyavirales	Hantaviridae	NA	Orthohantavirus	11845	TRUE	TRUE	SS	RNA	enveloped	Ermonval et al. 2016; Song et al. 2006; https://www.cdc.gov/mmwr/preview/mmwrhtml/00051521.htm; Klein et al. 2015	Calisher et al. 2006	10	23.09	1.5	72	65.44	460	72	0.912204	2	2	0.872881	0.912204	ssRNA(-)	1	reservoir_only
Hantaan_virus	Niviventer_confucianus	1	1	1	aerosolized excreta, or saliva (via bite)	5	15	1	thrombocytopenia, hemorrhagic fever with renal syndrome (HFRS)	1	high	Apodemus_agrarius is considered the primary reservoir; some evidence that rate of subclinical cases/mild disease is higher in local population (constant exposure) vs. foreigners/soldiers; can remain viable in the environment for 2-3 days	wild	Isolation	RODENTIA	MURIDAE	Niviventer	confucianus	Bunyavirales	Hantaviridae	NA	Orthohantavirus	11845	TRUE	TRUE	SS	RNA	enveloped	Ermonval et al. 2016; Song et al. 2006; https://www.cdc.gov/mmwr/preview/mmwrhtml/00051521.htm; Klein et al. 2015	Wang et al. 2000	10	65.05	3.7	12	21	72	21	0.692594	1	1	0.872881	0.912204	ssRNA(-)	1	direct_host
Hendra_virus	Equus_caballus	2	1	4	bodily fluids, animal excreta	57	57	1	encephalitis	1	low	There's only been 7 human cases, all people taking care of horses; henipaviruses like Nipah and Hendra can interfere with interferon signaling - huge contributor to virulence	domestic	Isolation	PERISSODACTYLA	EQUIDAE	Equus	caballus	Mononegavirales	Paramyxoviridae	Paramyxovirinae	Henipavirus	18234	TRUE	FALSE	SS	RNA	enveloped	Middleton 2014; Field 2016	Tulsiani et al. 2011	57	403599	1	744	338.97	2067	771	0.636988	5	23	0.452341	0.692547	ssRNA(-)	1	int_host
Hendra_virus	Pteropus_alecto	1	0	1	bodily fluids, animal excreta	57	57	1	encephalitis	1	low	There's only been 7 human cases, all people taking care of horses; henipaviruses like Nipah and Hendra can interfere with interferon signaling - huge contributor to virulence	wild	Isolation	CHIROPTERA	PTEROPODIDAE	Pteropus	alecto	Mononegavirales	Paramyxoviridae	Paramyxovirinae	Henipavirus	18234	TRUE	FALSE	SS	RNA	enveloped	Middleton 2014; Field 2016	Calisher et al. 2006	57	610.13	1	53.9999	177.517	92	24	0.6727	3	3	0.452341	0.692547	ssRNA(-)	1	reservoir_only
Hendra_virus	Pteropus_conspicillatus	1	0	1	bodily fluids, animal excreta	57	57	1	encephalitis	1	low	There's only been 7 human cases, all people taking care of horses; henipaviruses like Nipah and Hendra can interfere with interferon signaling - huge contributor to virulence	wild	Isolation	CHIROPTERA	PTEROPODIDAE	Pteropus	conspicillatus	Mononegavirales	Paramyxoviridae	Paramyxovirinae	Henipavirus	18234	TRUE	FALSE	SS	RNA	enveloped	Middleton 2014; Field 2016	Calisher et al. 2006	57	760.71	1	179.76	212.917	36	14	0.66417	3	3	0.452341	0.692547	ssRNA(-)	1	reservoir_only
Hendra_virus	Pteropus_poliocephalus	1	0	1	bodily fluids, animal excreta	57	57	1	encephalitis	1	low	There's only been 7 human cases, all people taking care of horses; henipaviruses like Nipah and Hendra can interfere with interferon signaling - huge contributor to virulence	wild	Isolation	CHIROPTERA	PTEROPODIDAE	Pteropus	poliocephalus	Mononegavirales	Paramyxoviridae	Paramyxovirinae	Henipavirus	18234	TRUE	FALSE	SS	RNA	enveloped	Middleton 2014; Field 2016	Calisher et al. 2006	57	702.78	1	180	187.72	184	26	0.65216	4	5	0.452341	0.692547	ssRNA(-)	1	reservoir_only
Hendra_virus	Pteropus_scapulatus	1	0	1	bodily fluids, animal excreta	57	57	1	encephalitis	1	low	There's only been 7 human cases, all people taking care of horses; henipaviruses like Nipah and Hendra can interfere with interferon signaling - huge contributor to virulence	wild	Isolation	CHIROPTERA	PTEROPODIDAE	Pteropus	scapulatus	Mononegavirales	Paramyxoviridae	Paramyxovirinae	Henipavirus	18234	TRUE	FALSE	SS	RNA	enveloped	Middleton 2014; Field 2016	Calisher et al. 2006	57	380.35	1	179.76	136.875	97	18	0.692547	3	3	0.452341	0.692547	ssRNA(-)	1	reservoir_only
Hepatitis_E_virus	Bos_taurus	1	0	1	fecal-oral	1	4	2	jaundice, hepatomegaly	4	high	Note that genotypes 1 and 2 are found exclusively in humans; but genotypes 3 and 4 are found in both humand and other mammals (so this database refers to genotypes 3 and 4); More severe in pregnant women - case fatality rates of 20-25% have been reported in pregnant women in 3rd trimester	domestic	PCR	CETARTIODACTYLA	BOVIDAE	Bos	taurus	Group_IV	Hepeviridae	NA	Hepevirus	7176	TRUE	FALSE	SS	RNA	non-enveloped	Pavio et al. 2010; Pavio et al. 2013; Huang et al. 2016; https://www.cdc.gov/hepatitis/hev/hevfaq.htm	Favorov et al. 2000	2.5	618642	1	240	280.48	4238	2742	0.682652	11	46	0.729587	0.77642	ssRNA(+)	1	reservoir_only
Hepatitis_E_virus	Rattus_rattus	1	0	1	fecal-oral	1	4	2	jaundice, hepatomegaly	4	high	Note that genotypes 1 and 2 are found exclusively in humans; but genotypes 3 and 4 are found in both humand and other mammals (so this database refers to genotypes 3 and 4); More severe in pregnant women - case fatality rates of 20-25% have been reported in pregnant women in 3rd trimester	domestic	PCR	RODENTIA	MURIDAE	Rattus	rattus	Group_IV	Hepeviridae	NA	Hepevirus	7176	TRUE	FALSE	SS	RNA	non-enveloped	Pavio et al. 2010; Pavio et al. 2013; Johne et al. 2010	Ryll et al. 2017	2.5	142.68	5.88	50.4	23.45	3004	1193	0.664981	5	11	0.729587	0.77642	ssRNA(+)	1	reservoir_only
Hepatitis_E_virus	Sus_scrofa	1	1	1	fecal-oral, meat consumption	1	4	2	jaundice, hepatomegaly	4	high	Note that genotypes 1 and 2 are found exclusively in humans; but genotypes 3 and 4 are found in both humand and other mammals (so this database refers to genotypes 3 and 4); More severe in pregnant women - case fatality rates of 20-25% have been reported in pregnant women in 3rd trimester	domestic	PCR	CETARTIODACTYLA	SUIDAE	Sus	scrofa	Group_IV	Hepeviridae	NA	Hepevirus	7176	TRUE	FALSE	SS	RNA	non-enveloped	Pavio et al. 2010; Pavio et al. 2013; Anita et al. 2014; Kasorndorkbua et al. 2004; https://www.who.int/news-room/fact-sheets/detail/hepatitis-e; https://www.cdc.gov/hepatitis/hev/hevfaq.htm	Anita et al. 2014	2.5	84471.5	4.52	252	115.2	3932	1671	0.67177	13	41	0.729587	0.77642	ssRNA(+)	1	direct_host
Hepatitis_E_virus	Capra_hircus	1	0	1	fecal-oral, meat consumption	1	4	2	jaundice, hepatomegaly	4	high	Note that genotypes 1 and 2 are found exclusively in humans; but genotypes 3 and 4 are found in both humand and other mammals (so this database refers to genotypes 3 and 4); More severe in pregnant women - case fatality rates of 20-25% have been reported in pregnant women in 3rd trimester	domestic	PCR	CETARTIODACTYLA	BOVIDAE	Capra	hircus	Group_IV	Hepeviridae	NA	Hepevirus	7176	TRUE	FALSE	SS	RNA	non-enveloped	Pavio et al. 2010; Pavio et al. 2013; Li et al. 2017; https://www.cdc.gov/hepatitis/hev/hevfaq.htm	Meng et al.	2.5	47386.5	1.45	249.6	156	1557	796	0.650447	5	18	0.729587	0.77642	ssRNA(+)	1	reservoir_only
Hepatitis_E_virus	Cervus_nippon	1	0	1	meat consumption	1	4	2	jaundice, hepatomegaly	4	high	Note that genotypes 1 and 2 are found exclusively in humans; but genotypes 3 and 4 are found in both humand and other mammals (so this database refers to genotypes 3 and 4); More severe in pregnant women - case fatality rates of 20-25% have been reported in pregnant women in 3rd trimester	wild	PCR	CETARTIODACTYLA	CERVIDAE	Cervus	nippon	Group_IV	Hepeviridae	NA	Hepevirus	7176	TRUE	FALSE	SS	RNA	non-enveloped	Pavio et al. 2010; Pavio et al. 2013; Tei et al. 2003; https://www.cdc.gov/hepatitis/hev/hevfaq.htm	Tei et al. 2003	2.5	53000	1	305.04	223.66	1229	201	0.755788	0	1	0.729587	0.77642	ssRNA(+)	1	reservoir_only
Human_adenovirus_A	Pan_troglodytes	1	1	1	fecal-oral, respiratory	5	0	1	gastrointestinal symptoms	4	high	We were unable to find a species-specific case mortality for adenoviruses A, B, E, and F - instead, we used adenovirus C case mortality as a proxy	wild	PCR	PRIMATES	HOMINIDAE	Pan	troglodytes	Group_I	Adenoviridae	NA	Mastadenovirus	34125	FALSE	FALSE	DS	DNA	non-enveloped	Roy et al. 2009; Ghebremedhin 2014; Echavarria 2008	Wevers et al. 2011	2.5	45000	1.05	720	231.49	3960	505	0.130389	10	20	0	0.130389	dsDNA	1	direct_host
Human_adenovirus_B	Gorilla_beringei	1	1	1	fecal-oral, respiratory	5	5	1	respiratory illness	4	high	We were unable to find a species-specific case mortality for adenoviruses A, B, E, and F - instead, we used adenovirus C case mortality as a proxy	wild	PCR	PRIMATES	HOMINIDAE	Gorilla	beringei	Group_I	Adenoviridae	NA	Mastadenovirus	35514	FALSE	FALSE	DS	DNA	non-enveloped	Roy et al. 2009; Ghebremedhin 2014; Echavarria 2008	Roy et al. 2009	5	149325	1.05	648	257	495	49	0.160127	2	4	0.146366	0.160127	dsDNA	1	direct_host
Human_adenovirus_B	Pan_paniscus	1	1	1	fecal-oral, respiratory	5	5	1	respiratory illness	4	high	We were unable to find a species-specific case mortality for adenoviruses A, B, E, and F - instead, we used adenovirus C case mortality as a proxy	wild	PCR	PRIMATES	HOMINIDAE	Pan	paniscus	Group_I	Adenoviridae	NA	Mastadenovirus	35514	FALSE	FALSE	DS	DNA	non-enveloped	Roy et al. 2009; Ghebremedhin 2014; Echavarria 2008	Roy et al. 2009	5	35119.9	1.01	576	235.24	856	45	0.122517	6	6	0.146366	0.160127	dsDNA	1	direct_host
Human_adenovirus_B	Pan_troglodytes	1	1	1	fecal-oral, respiratory	5	5	1	respiratory illness	4	high	We were unable to find a species-specific case mortality for adenoviruses A, B, E, and F - instead, we used adenovirus C case mortality as a proxy	wild	PCR	PRIMATES	HOMINIDAE	Pan	troglodytes	Group_I	Adenoviridae	NA	Mastadenovirus	35514	FALSE	FALSE	DS	DNA	non-enveloped	Roy et al. 2009; Ghebremedhin 2014; Echavarria 2008	Roy et al. 2009	5	45000	1.05	720	231.49	3960	505	0.130389	10	20	0.146366	0.160127	dsDNA	1	direct_host
Human_adenovirus_B	Gorilla_gorilla	1	1	1	fecal-oral, respiratory	5	5	1	respiratory illness	4	high	We were unable to find a species-specific case mortality for adenoviruses A, B, E, and F - instead, we used adenovirus C case mortality as a proxy	wild	PCR	PRIMATES	HOMINIDAE	Gorilla	gorilla	Group_I	Adenoviridae	NA	Mastadenovirus	35514	FALSE	FALSE	DS	DNA	non-enveloped	Roy et al. 2009; Ghebremedhin 2014; Echavarria 2008	Roy et al. 2009	5	112589	1.05	648	257	2396	301	0.160127	7	10	0.146366	0.160127	dsDNA	1	direct_host
Human_adenovirus_C	Gorilla_beringei	1	1	1	fecal-oral, respiratory	5	5	2	respiratory illness	4	high	We were unable to find a species-specific case mortality for adenoviruses A, B, E, and F - instead, we used adenovirus C case mortality as a proxy	wild	PCR	PRIMATES	HOMINIDAE	Gorilla	beringei	Group_I	Adenoviridae	NA	Mastadenovirus	35937	FALSE	FALSE	DS	DNA	non-enveloped	Roy et al. 2009; Ghebremedhin 2014; Echavarria 2008	Roy et al. 2009	5	149325	1.05	648	257	495	49	0.160127	2	4	0.146366	0.160127	dsDNA	1	direct_host
Human_adenovirus_C	Gorilla_gorilla	1	1	1	fecal-oral, respiratory	5	5	2	respiratory illness	4	high	We were unable to find a species-specific case mortality for adenoviruses A, B, E, and F - instead, we used adenovirus C case mortality as a proxy	wild	PCR	PRIMATES	HOMINIDAE	Gorilla	gorilla	Group_I	Adenoviridae	NA	Mastadenovirus	35937	FALSE	FALSE	DS	DNA	non-enveloped	Roy et al. 2009; Ghebremedhin 2014; Echavarria 2008	Roy et al. 2009	5	112589	1.05	648	257	2396	301	0.160127	7	10	0.146366	0.160127	dsDNA	1	direct_host
Human_adenovirus_C	Pan_paniscus	1	1	1	fecal-oral, respiratory	5	5	2	respiratory illness	4	high	We were unable to find a species-specific case mortality for adenoviruses A, B, E, and F - instead, we used adenovirus C case mortality as a proxy	wild	PCR	PRIMATES	HOMINIDAE	Pan	paniscus	Group_I	Adenoviridae	NA	Mastadenovirus	35937	FALSE	FALSE	DS	DNA	non-enveloped	Roy et al. 2009; Ghebremedhin 2014; Echavarria 2008	Roy et al. 2009	5	35119.9	1.01	576	235.24	856	45	0.122517	6	6	0.146366	0.160127	dsDNA	1	direct_host
Human_adenovirus_C	Pan_troglodytes	1	1	1	fecal-oral, respiratory	5	5	2	respiratory illness	4	high	We were unable to find a species-specific case mortality for adenoviruses A, B, E, and F - instead, we used adenovirus C case mortality as a proxy	wild	PCR	PRIMATES	HOMINIDAE	Pan	troglodytes	Group_I	Adenoviridae	NA	Mastadenovirus	35937	FALSE	FALSE	DS	DNA	non-enveloped	Roy et al. 2009; Ghebremedhin 2014; Echavarria 2008	Roy et al. 2009	5	45000	1.05	720	231.49	3960	505	0.130389	10	20	0.146366	0.160127	dsDNA	1	direct_host
Human_adenovirus_E	Pan_paniscus	1	1	1	fecal-oral, respiratory	5	5	1	conjunctivitis	4	high	We were unable to find a species-specific case mortality for adenoviruses A, B, E, and F - instead, we used adenovirus C case mortality as a proxy	wild	PCR	PRIMATES	HOMINIDAE	Pan	paniscus	Group_I	Adenoviridae	NA	Mastadenovirus	35994	FALSE	FALSE	DS	DNA	non-enveloped	Roy et al. 2009; Ghebremedhin 2014; Echavarria 2008	Roy et al. 2009	5	35119.9	1.01	576	235.24	856	45	0.122517	6	6	0.0357172	0.130389	dsDNA	1	direct_host
Human_adenovirus_E	Pan_troglodytes	1	1	1	fecal-oral, respiratory	5	5	1	conjunctivitis	4	high	We were unable to find a species-specific case mortality for adenoviruses A, B, E, and F - instead, we used adenovirus C case mortality as a proxy	wild	PCR	PRIMATES	HOMINIDAE	Pan	troglodytes	Group_I	Adenoviridae	NA	Mastadenovirus	35994	FALSE	FALSE	DS	DNA	non-enveloped	Roy et al. 2009; Ghebremedhin 2014; Echavarria 2008	Roy et al. 2009	5	45000	1.05	720	231.49	3960	505	0.130389	10	20	0.0357172	0.130389	dsDNA	1	direct_host
Human_adenovirus_F	Gorilla_gorilla	1	1	1	fecal-oral, respiratory	5	5	1	gastroentiritis	4	high	We were unable to find a species-specific case mortality for adenoviruses A, B, E, and F - instead, we used adenovirus C case mortality as a proxy	wild	PCR	PRIMATES	HOMINIDAE	Gorilla	gorilla	Group_I	Adenoviridae	NA	Mastadenovirus	34214	FALSE	FALSE	DS	DNA	non-enveloped	Roy et al. 2009; Ghebremedhin 2014; Echavarria 2008	Wevers et al. 2011	5	112589	1.05	648	257	2396	301	0.160127	7	10	0.146366	0.160127	dsDNA	1	direct_host
Human_adenovirus_F	Pan_troglodytes	1	1	1	fecal-oral, respiratory	5	5	1	gastroentiritis	4	high	We were unable to find a species-specific case mortality for adenoviruses A, B, E, and F - instead, we used adenovirus C case mortality as a proxy	wild	PCR	PRIMATES	HOMINIDAE	Pan	troglodytes	Group_I	Adenoviridae	NA	Mastadenovirus	34214	FALSE	FALSE	DS	DNA	non-enveloped	Roy et al. 2009; Ghebremedhin 2014; Echavarria 2008	Wevers et al. 2011	5	45000	1.05	720	231.49	3960	505	0.130389	10	20	0.146366	0.160127	dsDNA	1	direct_host
Human_enterovirus_A	Pan_troglodytes	1	1	1	fecal-oral, respiratory	0.3	5	1	flu-like symptoms	4	high	We were unable to find a species-specific case mortalities so instead, we took the range defined in Geoghegan et al. 2016	wild	PCR	PRIMATES	HOMINIDAE	Pan	troglodytes	Picornavirales	Picornaviridae	NA	Enterovirus	7413	TRUE	FALSE	SS	RNA	non-enveloped	Nyugen et al. 2014; Fieldhouse et al. 2018	Sadeuh-Mba et al. 2014	2.65	45000	1.05	720	231.49	3960	505	0.130389	10	20	0.146366	0.160127	ssRNA(+)	1	direct_host
Human_enterovirus_A	Gorilla_gorilla	1	1	1	fecal-oral, respiratory	0.3	5	1	flu-like symptoms	4	high	We were unable to find a species-specific case mortalities so instead, we took the range defined in Geoghegan et al. 2017	wild	PCR	PRIMATES	HOMINIDAE	Gorilla	gorilla	Picornavirales	Picornaviridae	NA	Enterovirus	7413	TRUE	FALSE	SS	RNA	non-enveloped	Nyugen et al. 2014; Fieldhouse et al. 2018	Sadeuh-Mba et al. 2014	2.65	112589	1.05	648	257	2396	301	0.160127	7	10	0.146366	0.160127	ssRNA(+)	1	direct_host
Human_enterovirus_B	Papio_cynocephalus	1	1	1	fecal-oral, respiratory	0.3	5	1	flu-like symptoms	4	high	We were unable to find a species-specific case mortalities so instead, we took the range defined in Geoghegan et al. 2018	captive	Isolation	PRIMATES	CERCOPITHECIDAE	Papio	cynocephalus	Picornavirales	Picornaviridae	NA	Enterovirus	7389	TRUE	FALSE	SS	RNA	non-enveloped	Nyugen et al. 2014; Fieldhouse et al. 2018	Kalter et al. 1966	2.65	15822.1	1.01	540	172.99	872	162	0.414726	3	12	0.229905	0.419763	ssRNA(+)	1	direct_host
Human_enterovirus_B	Mandrillus_sphinx	1	1	1	fecal-oral, respiratory	0.3	5	1	flu-like symptoms	4	high	We were unable to find a species-specific case mortalities so instead, we took the range defined in Geoghegan et al. 2019	wild	PCR	PRIMATES	CERCOPITHECIDAE	Mandrillus	sphinx	Picornavirales	Picornaviridae	NA	Enterovirus	7389	TRUE	FALSE	SS	RNA	non-enveloped	Nyugen et al. 2014; Fieldhouse et al. 2018	Van Nguyen et al. 2014	2.65	16685.1	1.02	555.96	173.99	149	17	0.419763	2	3	0.229905	0.419763	ssRNA(+)	1	direct_host
Human_enterovirus_D	Pan_troglodytes	1	1	1	fecal-oral, respiratory	0.3	5	1	flu-like symptoms	4	high	We were unable to find a species-specific case mortalities so instead, we took the range defined in Geoghegan et al. 2020	wild	PCR	PRIMATES	HOMINIDAE	Pan	troglodytes	Picornavirales	Picornaviridae	NA	Enterovirus	7390	TRUE	FALSE	SS	RNA	non-enveloped	Nyugen et al. 2014; Fieldhouse et al. 2018	Harvala et al. 2011	2.65	45000	1.05	720	231.49	3960	505	0.130389	10	20	0.415887	0.429648	ssRNA(+)	1	direct_host
Human_enterovirus_D	Gorilla_gorilla	1	1	1	fecal-oral, respiratory	0.3	5	1	flu-like symptoms	4	high	We were unable to find a species-specific case mortalities so instead, we took the range defined in Geoghegan et al. 2021	wild	PCR	PRIMATES	HOMINIDAE	Gorilla	gorilla	Picornavirales	Picornaviridae	NA	Enterovirus	7390	TRUE	FALSE	SS	RNA	non-enveloped	Nyugen et al. 2014; Fieldhouse et al. 2018	Harvala et al. 2011	2.65	112589	1.05	648	257	2396	301	0.160127	7	10	0.415887	0.429648	ssRNA(+)	1	direct_host
Human_T-lymphotropic_virus_1	Cercocebus_agilis	1	1	2	bodily fluids (blood/sexual)	1	4	3	neurological disease, T-cell leukemia/lymphoma	4	high	Virus 1 most often produces disease, but virus 3 is more often implicated in spillover events from nonhuman primates	wild	PCR	PRIMATES	CERCOPITHECIDAE	Cercocebus	agilis	Ortervirales	Retroviridae	Orthoretrovirinae	Deltaretrovirus	9028	FALSE	FALSE	SS	RNA	enveloped	Mossoun et al. 2017; https://emedicine.medscape.com/article/219285-overview#a5	Sintasatah et al. 2009	2.5	7105.62	1	240	170	22	12	0.406803	2	2	0.648691	0.573865	ssRNA-RT	1	direct_host
Human_T-lymphotropic_virus_1	Papio_ursinus	1	1	2	bodily fluids (blood/sexual)	1	4	3	neurological disease, T-cell leukemia/lymphoma	4	high	Virus 1 most often produces disease, but virus 3 is more often implicated in spillover events from nonhuman primates	wild	PCR	PRIMATES	CERCOPITHECIDAE	Papio	ursinus	Ortervirales	Retroviridae	Orthoretrovirinae	Deltaretrovirus	9028	FALSE	FALSE	SS	RNA	enveloped	Mossoun et al. 2017; https://emedicine.medscape.com/article/219285-overview#a10	Mathieux et al. 1998	2.5	17729.4	1.01	540	185.92	478	63	0.418922	1	7	0.648691	0.573865	ssRNA-RT	1	direct_host
Human_T-lymphotropic_virus_1	Papio_cynocephalus	1	1	2	bodily fluids (blood/sexual)	1	4	3	neurological disease, T-cell leukemia/lymphoma	4	high	Virus 1 most often produces disease, but virus 3 is more often implicated in spillover events from nonhuman primates	wild	PCR	PRIMATES	CERCOPITHECIDAE	Papio	cynocephalus	Ortervirales	Retroviridae	Orthoretrovirinae	Deltaretrovirus	9028	FALSE	FALSE	SS	RNA	enveloped	Mossoun et al. 2017; https://emedicine.medscape.com/article/219285-overview#a9	Voevodin et al. 1997	2.5	15822.1	1.01	540	172.99	872	162	0.414726	3	12	0.648691	0.573865	ssRNA-RT	1	direct_host
Human_T-lymphotropic_virus_1	Macaca_maura	1	1	2	bodily fluids (blood/sexual)	1	4	3	neurological disease, T-cell leukemia/lymphoma	4	high	Virus 1 most often produces disease, but virus 3 is more often implicated in spillover events from nonhuman primates	wild	Isolation	PRIMATES	CERCOPITHECIDAE	Macaca	maura	Ortervirales	Retroviridae	Orthoretrovirinae	Deltaretrovirus	9028	FALSE	FALSE	SS	RNA	enveloped	Mossoun et al. 2017; https://emedicine.medscape.com/article/219285-overview#a11	Saksena et al. 1994	2.5	7290.3	1.01	319.067	167.19	25	2	0.408279	1	1	0.648691	0.573865	ssRNA-RT	1	direct_host
Human_T-lymphotropic_virus_1	Cercopithecus_mona	1	1	2	bodily fluids (blood/sexual)	1	4	3	neurological disease, T-cell leukemia/lymphoma	4	high	Virus 1 most often produces disease, but virus 3 is more often implicated in spillover events from nonhuman primates	wild	PCR	PRIMATES	CERCOPITHECIDAE	Cercopithecus	mona	Ortervirales	Retroviridae	Orthoretrovirinae	Deltaretrovirus	9028	FALSE	FALSE	SS	RNA	enveloped	Mossoun et al. 2017; https://emedicine.medscape.com/article/219285-overview#a7	Sintasatah et al. 2009	2.5	3980.17	1	360	166.63	84	26	0.524678	3	4	0.648691	0.573865	ssRNA-RT	1	direct_host
Human_T-lymphotropic_virus_1	Cercopithecus_nictitans	1	1	2	bodily fluids (blood/sexual)	1	4	3	neurological disease, T-cell leukemia/lymphoma	4	high	Virus 1 most often produces disease, but virus 3 is more often implicated in spillover events from nonhuman primates	wild	PCR	PRIMATES	CERCOPITHECIDAE	Cercopithecus	nictitans	Ortervirales	Retroviridae	Orthoretrovirinae	Deltaretrovirus	9028	FALSE	FALSE	SS	RNA	enveloped	Mossoun et al. 2017; https://emedicine.medscape.com/article/219285-overview#a6	Sintasatah et al. 2009	2.5	5256.91	1	276	169.51	87	15	0.573865	3	4	0.648691	0.573865	ssRNA-RT	1	direct_host
Human_T-lymphotropic_virus_1	Papio_anubis	1	1	2	bodily fluids (blood/sexual)	1	4	3	neurological disease, T-cell leukemia/lymphoma	4	high	Virus 1 most often produces disease, but virus 3 is more often implicated in spillover events from nonhuman primates	wild	PCR	PRIMATES	CERCOPITHECIDAE	Papio	anubis	Ortervirales	Retroviridae	Orthoretrovirinae	Deltaretrovirus	9028	FALSE	FALSE	SS	RNA	enveloped	Mossoun et al. 2017; https://emedicine.medscape.com/article/219285-overview#a8	Saksena et al. 1994	2.5	17728.6	1.01	302.4	178.96	736	135	0.402225	1	4	0.648691	0.573865	ssRNA-RT	1	direct_host
Human_T-lymphotropic_virus_2	Pan_paniscus	1	1	2	bodily fluids (blood/sexual)	1	4	3	neurological disease, T-cell leukemia/lymphoma	4	high	Proxied most variables with virus 1 because they are believed to be very similar (though virus 2 may be slighly less pathogenic)	wild	PCR	PRIMATES	HOMINIDAE	Pan	paniscus	Ortervirales	Retroviridae	NA	Deltaretrovirus	8767.5	FALSE	FALSE	SS	RNA	enveloped	Mossoun et al. 2017; https://emedicine.medscape.com/article/219285-overview#a12	Ahuka-Mundeke et al. 2011	2.5	35119.9	1.01	576	235.24	856	45	0.122517	6	6	0	0.122517	ssRNA-RT	1	direct_host
Human_T-lymphotropic_virus_3	Cercopithecus_mona	1	1	2	bodily fluids (blood/sexual)	1	4	1	asymptomatic	4	high	Discovered in 2005	wild	PCR	PRIMATES	CERCOPITHECIDAE	Cercopithecus	mona	Ortervirales	Retroviridae	Orthoretrovirinae	Deltaretrovirus	8918	FALSE	FALSE	SS	RNA	enveloped	Mossoun et al. 2017; https://emedicine.medscape.com/article/219285-overview#a14	Sintasatah et al. 2009	2.5	3980.17	1	360	166.63	84	26	0.524678	3	4	0.650936	0.573865	ssRNA-RT	1	direct_host
Human_T-lymphotropic_virus_3	Cercopithecus_nictitans	1	1	2	bodily fluids (blood/sexual)	1	4	1	asymptomatic	4	high	Discovered in 2005	wild	PCR	PRIMATES	CERCOPITHECIDAE	Cercopithecus	nictitans	Ortervirales	Retroviridae	Orthoretrovirinae	Deltaretrovirus	8918	FALSE	FALSE	SS	RNA	enveloped	Mossoun et al. 2017; https://emedicine.medscape.com/article/219285-overview#a13	Sintasatah et al. 2009	2.5	5256.91	1	276	169.51	87	15	0.573865	3	4	0.650936	0.573865	ssRNA-RT	1	direct_host
Human_T-lymphotropic_virus_3	Pan_paniscus	1	1	2	bodily fluids (blood/sexual)	1	4	1	asymptomatic	4	high	Discovered in 2005	wild	Isolation	PRIMATES	HOMINIDAE	Pan	paniscus	Ortervirales	Retroviridae	Orthoretrovirinae	Deltaretrovirus	8918	FALSE	FALSE	SS	RNA	enveloped	Mossoun et al. 2017; https://emedicine.medscape.com/article/219285-overview#a17	Sintasatah et al. 2009	2.5	35119.9	1.01	576	235.24	856	45	0.122517	6	6	0.650936	0.573865	ssRNA-RT	1	direct_host
Human_T-lymphotropic_virus_3	Cercocebus_agilis	1	1	2	bodily fluids (blood/sexual)	1	4	1	asymptomatic	4	high	Discovered in 2005	wild	PCR	PRIMATES	CERCOPITHECIDAE	Cercocebus	agilis	Ortervirales	Retroviridae	Orthoretrovirinae	Deltaretrovirus	8918	FALSE	FALSE	SS	RNA	enveloped	Mossoun et al. 2017; https://emedicine.medscape.com/article/219285-overview#a16	Sintasatah et al. 2009	2.5	7105.62	1	240	170	22	12	0.406803	2	2	0.650936	0.573865	ssRNA-RT	1	direct_host
Human_T-lymphotropic_virus_3	Lophocebus_albigena	1	1	2	bodily fluids (blood/sexual)	1	4	1	asymptomatic	4	high	Discovered in 2005	wild	PCR	PRIMATES	CERCOPITHECIDAE	Lophocebus	albigena	Ortervirales	Retroviridae	Orthoretrovirinae	Deltaretrovirus	8918	FALSE	FALSE	SS	RNA	enveloped	Mossoun et al. 2017; https://emedicine.medscape.com/article/219285-overview#a18	Sintasatah et al. 2009	2.5	7418.71	1.01	392.4	182.64	68	4	0.421167	2	3	0.650936	0.573865	ssRNA-RT	1	direct_host
Human_T-lymphotropic_virus_3	Papio_hamadryas	1	1	2	bodily fluids (blood/sexual)	1	4	1	asymptomatic	4	high	Discovered in 2005	wild	PCR	PRIMATES	CERCOPITHECIDAE	Papio	hamadryas	Ortervirales	Retroviridae	Orthoretrovirinae	Deltaretrovirus	8918	FALSE	FALSE	SS	RNA	enveloped	Mossoun et al. 2017; https://emedicine.medscape.com/article/219285-overview#a15	Sintasatah et al. 2009	2.5	14007.1	1.01	450	180	616	75	0.391908	3	4	0.650936	0.573865	ssRNA-RT	1	direct_host
Influenza_A_H3N2_virus	Canis_lupus	2	1	3	respiratory	0.3	0.3	1	flu-like symptoms	4	high		domestic	PCR	CARNIVORA	CANIDAE	Canis	lupus	Articulavirales	Orthomyxoviridae	NA	Alphainfluenzavirus	13444.6	TRUE	TRUE	SS	RNA	enveloped	Thiry et al. 2007	Thiry et al. 2007	0.3	31756.5	4.98	354	63.5	3742	345	0.772511	1	3	NA	0.975537	ssRNA(-)	1	int_host
Influenza_A_H3N2_virus	Sus_scrofa	2	1	3	respiratory	0.3	0.3	1	flu-like symptoms	4	high	Swine flu	domestic	Isolation	CETARTIODACTYLA	SUIDAE	Sus	scrofa	Articulavirales	Orthomyxoviridae	NA	Alphainfluenzavirus	13444.6	TRUE	TRUE	SS	RNA	enveloped	Brown 2000	Brown 2000	0.3	84471.5	4.52	252	115.2	3932	1671	0.67177	13	41	1.04617	0.975537	ssRNA(-)	1	int_host
Influenza_A_H3N2_virus	Globicephala_melas	2	0	3	respiratory	0.3	0.3	1	flu-like symptoms	4	high		wild	Isolation	CETARTIODACTYLA	DELPHINIDAE	Globicephala	melas	Articulavirales	Orthomyxoviridae	NA	Alphainfluenzavirus	13444.6	TRUE	TRUE	SS	RNA	enveloped	Hinshaw et al. 1986	Hinshaw et al. 1986	0.3	800000	1	540	479.06	248	30	0.727454	0	2	1.04617	0.975537	ssRNA(-)	1	secondary_only
Influenza_A_H3N2_virus	Nyctalus_noctula	2	0	3	respiratory	0.3	0.3	1	flu-like symptoms	4	high		wild	Isolation	CHIROPTERA	VESPERTILIONIDAE	Nyctalus	noctula	Articulavirales	Orthomyxoviridae	NA	Alphainfluenzavirus	13444.6	TRUE	TRUE	SS	RNA	enveloped		Calisher et al. 2006	0.3	28.48	1.33	144	72.24	613	73	0.975537	3	4	1.04617	0.975537	ssRNA(-)	1	secondary_only
Influenza_A_H3N2_virus	Neovison_vison	2	0	3	respiratory	0.3	0.3	1	flu-like symptoms	4	high		domestic	Isolation	CARNIVORA	MUSTELIDAE	Neovison	vison	Articulavirales	Orthomyxoviridae	NA	Alphainfluenzavirus	13444.6	TRUE	TRUE	SS	RNA	enveloped	Gagnon et al. 2009	Gagnon et al. 2009	0.3	660	4.5	136.8	57.5	105	16	0.712654	0	4	1.04617	0.975537	ssRNA(-)	1	secondary_only
Influenza_A_H5N1_virus	Sus_scrofa	2	1	3	respiratory	14	33	1	flu-like symptoms	3	high		domestic	Isolation	CETARTIODACTYLA	SUIDAE	Sus	scrofa	Articulavirales	Orthomyxoviridae	NA	Alphainfluenzavirus	13444.6	TRUE	TRUE	SS	RNA	enveloped	Li et al. 2008	Brown 2000	23.5	84471.5	4.52	252	115.2	3932	1671	0.67177	13	41	NA	0.777699	ssRNA(-)	1	int_host
Influenza_A_H5N1_virus	Mephitis_mephitis	2	0	3	respiratory	14	33	1	flu-like symptoms	3	high		wild	PCR	CARNIVORA	MEPHITIDAE	Mephitis	mephitis	Articulavirales	Orthomyxoviridae	NA	Alphainfluenzavirus	13444.6	TRUE	TRUE	SS	RNA	enveloped	Li et al. 2008	Britton et al. 2010	23.5	2399.99	5.7	155	63.29	538	246	0.777699	1	2	1.04617	0.777699	ssRNA(-)	1	secondary_only
Influenza_A_H5N1_virus	Felis_catus	2	1	3	respiratory	14	33	1	flu-like symptoms	3	high		domestic	PCR	CARNIVORA	FELIDAE	Felis	catus	Articulavirales	Orthomyxoviridae	NA	Alphainfluenzavirus	13444.6	TRUE	TRUE	SS	RNA	enveloped	Li et al. 2008	Thiry et al. 2007	23.5	2884.8	2.685	408	62.99	2495	1016	0.669865	4	14	1.04617	0.777699	ssRNA(-)	1	int_host
Influenza_C_virus	Sus_scrofa	2	1	3	respiratory	0	0	1	flu-like symptoms	4	high		domestic	Isolation	CETARTIODACTYLA	SUIDAE	Sus	scrofa	Articulavirales	Orthomyxoviridae	NA	Influenzavirus C	12555	TRUE	TRUE	SS	RNA	enveloped		Kimura et al. 1997	0	84471.5	4.52	252	115.2	3932	1671	0.67177	13	41	0	0.67177	ssRNA(-)	1	int_host
Junin_virus	Oligoryzomys_flavescens	1	1	1	aerosolized excreta	15	30	1	hemorrhagic fever	2	high		wild	Isolation	RODENTIA	CRICETIDAE	Oligoryzomys	flavescens	Group_V	Arenaviridae	NA	Arenavirus	10525	TRUE	TRUE	SS	RNA	enveloped	Grant et al. 2012; https://www.msdsonline.com/resources/sds-resources/free-safety-data-sheet-index/junin-virus/	Mills et al. 1991	22.5	21.3	4.95	21.5	20.59	71	27	0.83635	2	3	0.84348	0.868494	ssRNA(+/-)	1	direct_host
Junin_virus	Necromys_obscurus	1	1	1	aerosolized excreta	15	30	1	hemorrhagic fever	2	high		wild	Isolation	RODENTIA	CRICETIDAE	Necromys	obscurus	Group_V	Arenaviridae	NA	Arenavirus	10525	TRUE	TRUE	SS	RNA	enveloped	Grant et al. 2012; https://www.msdsonline.com/resources/sds-resources/free-safety-data-sheet-index/junin-virus/	Mills et al. 1991	22.5	40.69	4.86	11	21.97	4	2	0.849421	3	4	0.84348	0.868494	ssRNA(+/-)	1	direct_host
Junin_virus	Necromys_obscurus	1	1	1	aerosolized excreta	15	30	1	hemorrhagic fever	2	high		wild	Isolation	RODENTIA	CRICETIDAE	Necromys	obscurus	Group_V	Arenaviridae	NA	Arenavirus	10525	TRUE	TRUE	SS	RNA	enveloped	Grant et al. 2012; https://www.msdsonline.com/resources/sds-resources/free-safety-data-sheet-index/junin-virus/	Mills et al. 1991	22.5	40.69	4.86	11	21.97	4	2	0.849421	3	4	0.84348	0.868494	ssRNA(+/-)	1	direct_host
Junin_virus	Calomys_musculinus	1	1	1	aerosolized excreta	15	30	1	hemorrhagic fever	2	high		wild	Isolation	RODENTIA	CRICETIDAE	Calomys	musculinus	Group_V	Arenaviridae	NA	Arenavirus	10525	TRUE	TRUE	SS	RNA	enveloped	Grant et al. 2012; https://www.msdsonline.com/resources/sds-resources/free-safety-data-sheet-index/junin-virus/	Gonzalez et al. 2007	22.5	20.2	6.27	13.5	20.97	133	35	0.842005	1	1	0.84348	0.868494	ssRNA(+/-)	1	direct_host
Junin_virus	Calomys_laucha	1	1	1	aerosolized excreta	15	30	1	hemorrhagic fever	2	high		wild	Isolation	RODENTIA	CRICETIDAE	Calomys	laucha	Group_V	Arenaviridae	NA	Arenavirus	10525	TRUE	TRUE	SS	RNA	enveloped	Grant et al. 2012; https://www.msdsonline.com/resources/sds-resources/free-safety-data-sheet-index/junin-virus/	Gonzalez et al. 2007	22.5	14	5.3	13.5	25	93	19	0.868494	2	2	0.84348	0.868494	ssRNA(+/-)	1	direct_host
Junin_virus	Mus_musculus	1	1	1	aerosolized excreta	15	30	1	hemorrhagic fever	2	high		domestic	Isolation	RODENTIA	MURIDAE	Mus	musculus	Group_V	Arenaviridae	NA	Arenavirus	10525	TRUE	TRUE	SS	RNA	enveloped	Grant et al. 2012; https://www.msdsonline.com/resources/sds-resources/free-safety-data-sheet-index/junin-virus/	Evans 2013	22.5	19.3	5.54	72	19.6	6886	3196	0.726889	8	26	0.84348	0.868494	ssRNA(+/-)	1	direct_host
Junin_virus	Akodon_azarae	1	1	1	aerosolized excreta	15	30	1	hemorrhagic fever	2	high		wild	Isolation	RODENTIA	CRICETIDAE	Akodon	azarae	Group_V	Arenaviridae	NA	Arenavirus	10525	TRUE	TRUE	SS	RNA	enveloped	Grant et al. 2012; https://www.msdsonline.com/resources/sds-resources/free-safety-data-sheet-index/junin-virus/	Gonzalez et al. 2007	22.5	25.27	4.59	12	23	159	37	0.861726	2	2	0.84348	0.868494	ssRNA(+/-)	1	direct_host
Kasokero_virus	Rousettus_aegyptiacus	1	1	1	saliva	0	0	1	flu-like symptoms	1	high	Only one outbreak from the Kasokero cave in Uganda in 1986 (Chomel et al. 2014. Bat-related zoonoses); recombination rate proxied from other viruses in Bunyavirales	wild	Isolation	CHIROPTERA	PTEROPODIDAE	Rousettus	aegyptiacus	Bunyavirales	Nairoviridae	NA	Orthonairovirus	6317	TRUE	TRUE	SS	RNA	enveloped	Kalunda et al. 1986. Kasokero Virus: a new human pathogne from bats (Rousettus Aegyptiacus) in Uganda	Kalunda et al. 1986; Calisher et al. 2006	0	134	1.07	274.8	123.39	258	47	0.705804	4	5	0	0.705804	ssRNA(-)	1	direct_host
Laguna_Negra_virus	Oligoryzomys_microtis	1	1	1	fecal-oral, respiratory	15	15	1	hemorrhagic fever	1	high	Recombination frequency proxied with other hantaviruses	wild	PCR	RODENTIA	CRICETIDAE	Oligoryzomys	microtis	Bunyavirales	Hantaviridae	NA	Orthohantavirus	15450	TRUE	TRUE	SS	RNA	enveloped		Carrol et al. 2005	15	22.5	4.2375	21.5	20.59	19	8	0.82006	2	2	0.487402	0.868494	ssRNA(-)	1	direct_host
Laguna_Negra_virus	Calomys_laucha	1	1	1	fecal-oral, respiratory	15	15	1	hemorrhagic fever	1	high	Recombination frequency proxied with other hantaviruses	wild	Isolation	RODENTIA	CRICETIDAE	Calomys	laucha	Bunyavirales	Hantaviridae	NA	Orthohantavirus	15450	TRUE	TRUE	SS	RNA	enveloped		Acha & Szyfres 2003; Johnson et al. 1997	15	14	5.3	13.5	25	93	19	0.868494	2	2	0.487402	0.868494	ssRNA(-)	1	direct_host
Laguna_Negra_virus	Akodon_simulator	1	1	1	fecal-oral, respiratory	15	15	1	hemorrhagic fever	1	high	Recombination frequency proxied with other hantaviruses	wild	PCR	RODENTIA	CRICETIDAE	Akodon	simulator	Bunyavirales	Hantaviridae	NA	Orthohantavirus	15450	TRUE	TRUE	SS	RNA	enveloped		Levis et al. 2004	15	42.5	4.59	12	23	20	4	0.86264	1	1	0.487402	0.868494	ssRNA(-)	1	direct_host
Laguna_Negra_virus	Calomys_callosus	1	1	1	fecal-oral, respiratory	15	15	1	hemorrhagic fever	1	high	Recombination frequency proxied with other hantaviruses	wild	PCR	RODENTIA	CRICETIDAE	Calomys	callosus	Bunyavirales	Hantaviridae	NA	Orthohantavirus	15450	TRUE	TRUE	SS	RNA	enveloped		Levis et al. 2004	15	44.95	4.91	13.5	21.8	121	65	0.866937	2	4	0.487402	0.868494	ssRNA(-)	1	direct_host
Lake_Victoria_marburgvirus	Chlorocebus_aethiops	2	1	4	bodily fluids	23	23	1	hemorrhagic fever	3	low	Only 3 major outbreaks and sporadic cases ~450 total cases to date; calculated case mortality for monkey spillover vs. bat spillover by dividing # deaths by total # spillover cases; but note that differences in case mortality could be a result of lab patients in Europe receiving more care than cases in rural Africa	wild	PCR	PRIMATES	CERCOPITHECIDAE	Chlorocebus	aethiops	Mononegavirales	Filoviridae	NA	Marburgvirus	19111	TRUE	FALSE	SS	RNA	enveloped	Borchert et al. 2006; Glaze et al. 2015; Brauburger et al. 2012; Pigott et al. 2015; World Health Organization (1967). Outbreaks in laboratory personnel working with Cercopithecus monkeys from East Africa _ Europe.	Shi 2010; Swanepoel et al. 2007	23	3695.99	1	379.2	162	54	17	0.589478	1	7	0.816524	0.821778	ssRNA(-)	1	int_host
Lake_Victoria_marburgvirus	Rousettus_aegyptiacus	1	1	1	bodily fluids	86	86	1	hemorrhagic fever	3	low	Only 3 major outbreaks and sporadic cases ~450 total cases to date; calculated case mortality for monkey spillover vs. bat spillover by dividing # deaths by total # spillover cases; but note that differences in case mortality could be a result of lab patients in Europe receiving more care than cases in rural Africa	wild	PCR	CHIROPTERA	PTEROPODIDAE	Rousettus	aegyptiacus	Mononegavirales	Filoviridae	NA	Marburgvirus	19111	TRUE	FALSE	SS	RNA	enveloped	Borchert et al. 2006; Brauburger et al. 2012; Pigott et al. 2015	Pourrut et al. 2009	86	134	1.07	274.8	123.39	258	47	0.705804	4	5	0.816524	0.821778	ssRNA(-)	1	direct_host
Lake_Victoria_marburgvirus	Rhinolophus_eloquens	1	1	1	bodily fluids	86	86	1	hemorrhagic fever	3	low	Only 3 major outbreaks and sporadic cases ~450 total cases to date; calculated case mortality for monkey spillover vs. bat spillover by dividing # deaths by total # spillover cases; but note that differences in case mortality could be a result of lab patients in Europe receiving more care than cases in rural Africa	wild	PCR	CHIROPTERA	RHINOLOPHIDAE	Rhinolophus	eloquens	Mononegavirales	Filoviridae	NA	Marburgvirus	19111	TRUE	FALSE	SS	RNA	enveloped	Borchert et al. 2006; Brauburger et al. 2012; Pigott et al. 2015	Swanepoel et al. 2007	86	19.15	0.9867	360	91.673	4	3	0.695159	1	2	0.816524	0.821778	ssRNA(-)	1	direct_host
Lake_Victoria_marburgvirus	Miniopterus_inflatus	1	1	1	bodily fluids	86	86	1	hemorrhagic fever	3	low	Only 3 major outbreaks and sporadic cases ~450 total cases to date; calculated case mortality for monkey spillover vs. bat spillover by dividing # deaths by total # spillover cases; but note that differences in case mortality could be a result of lab patients in Europe receiving more care than cases in rural Africa	wild	Isolation	CHIROPTERA	VESPERTILIONIDAE	Miniopterus	inflatus	Mononegavirales	Filoviridae	NA	Marburgvirus	19111	TRUE	FALSE	SS	RNA	enveloped	Borchert et al. 2006; Brauburger et al. 2012; Pigott et al. 2015	Luby et al. 1969	86	14.9	0.99	168	91.24	29	11	0.821778	1	1	0.816524	0.821778	ssRNA(-)	1	direct_host
Lassa_virus	Mastomys_erythroleucus	1	1	1	respiratory, consumption, bodily fluids	15	69	1	hemorrhagic fever	3	high	nosocomial transmission raises mortality rate >50%	wild	Isolation	RODENTIA	MURIDAE	Mastomys	erythroleucus	Bunyavirales	Arenaviridae	NA	Mammarenavirus	10681	TRUE	TRUE	SS	RNA	enveloped	Shafer et al. 2014; Almudena Mari Saez et al. 2018	Gonzalez et al. 2007	42	64.07	11.23	36	21.13	97	33	0.711453	1	2	0.783929	0.722125	ssRNA(+/-)	1	direct_host
Lassa_virus	Mastomys_natalensis	1	1	1	respiratory, consumption, bodily fluids	15	69	1	hemorrhagic fever	3	high	nosocomial transmission raises mortality rate >50%	wild	PCR	RODENTIA	MURIDAE	Mastomys	natalensis	Bunyavirales	Arenaviridae	NA	Mammarenavirus	10681	TRUE	TRUE	SS	RNA	enveloped	Shafer et al. 2014; Almudena Mari Saez et al. 2018	Fichet-Calvet et al. 2007	42	41.85	9.23	60	23.64	537	287	0.712745	1	2	0.783929	0.722125	ssRNA(+/-)	1	direct_host
Lassa_virus	Macaca_fascicularis	2	0	4	bodily fluids	15	69	1	hemorrhagic fever	3	high	nosocomial transmission raises mortality rate >50%	domestic	Isolation	PRIMATES	CERCOPITHECIDAE	Macaca	fascicularis	Bunyavirales	Arenaviridae	NA	Mammarenavirus	10681	TRUE	TRUE	SS	RNA	enveloped	Shafer et al. 2014; S. P. Fisher-Hoch et al. 2000; WHO 2018; Lisa E Hensley et al. 2011; David Safronetz 2013	Wulff et al. 1975	42	4569.32	1	456	164.69	1084	190	0.405899	4	11	0.783929	0.722125	ssRNA(+/-)	1	direct_host
Lymphocytic_choriomeningitis_virus	Apodemus_sylvaticus	1	1	1	aerosolized excreta, contact with fomites	1	1	1	encephalitis, congenital abnormalities	1	high	Horizontal human-to-human tranmission has not been reported, but vertical transmission occurs (congenital abnormalities). Spillovers are believed to occur seasonally - but many cases are mild/asymptomatic and thus go unreported	wild	PCR	RODENTIA	MURIDAE	Apodemus	sylvaticus	Group_V	Arenaviridae	NA	Arenavirus	10056	TRUE	TRUE	SS	RNA	enveloped	Bonthius et al. 2012	Ledesma et al. 2009	1	21.9	5.16	52.8	23.68	2278	581	0.733956	3	13	0.826952	0.845733	ssRNA(+/-)	1	direct_host
Lymphocytic_choriomeningitis_virus	Mus_musculus	1	1	1	aerosolized excreta, contact with fomites	1	1	1	encephalitis, congenital abnormalities	1	high	Horizontal human-to-human tranmission has not been reported, but vertical transmission occurs (congenital abnormalities). Spillovers are believed to occur seasonally - but many cases are mild/asymptomatic and thus go unreported	domestic	Isolation	RODENTIA	MURIDAE	Mus	musculus	Group_V	Arenaviridae	NA	Arenavirus	10056	TRUE	TRUE	SS	RNA	enveloped	Bonthius et al. 2012	Gonzalez et al. 2007	1	19.3	5.54	72	19.6	6886	3196	0.726889	8	26	0.826952	0.845733	ssRNA(+/-)	1	direct_host
Lymphocytic_choriomeningitis_virus	Mesocricetus_auratus	1	1	1	aerosolized excreta, contact with fomites	1	1	1	encephalitis, congenital abnormalities	1	high	Horizontal human-to-human tranmission has not been reported, but vertical transmission occurs (congenital abnormalities). Spillovers are believed to occur seasonally - but many cases are mild/asymptomatic and thus go unreported	captive	Isolation	RODENTIA	CRICETIDAE	Mesocricetus	auratus	Group_V	Arenaviridae	NA	Arenavirus	10056	TRUE	TRUE	SS	RNA	enveloped	Bonthius et al. 2012	Acha & Szyfres 2003; Parker et al. 1976	1	98.6	8.79	120	15.49	1048	368	0.808393	1	7	0.826952	0.845733	ssRNA(+/-)	1	direct_host
Machupo_virus	Calomys_callosus	1	1	1	aerosolized excreta	25	30	1	hemorrhagic fever	2	high	Bolivian hemorrhagic fever, "Black typhus"	wild	Isolation	RODENTIA	CRICETIDAE	Calomys	callosus	Group_V	Arenaviridae	NA	Arenavirus	10635	TRUE	TRUE	SS	RNA	enveloped	Patterson et al. 2014	Webb et al. 1975	27.5	44.95	4.91	13.5	21.8	121	65	0.866937	2	4	0.676184	0.866937	ssRNA(+/-)	1	direct_host
Menangle_virus	Pteropus_poliocephalus	1	0	1	animal excreta	0	0	1	flu-like symptoms	1	low	Causes reproductive disease in pigs - e.g., birth abnormalities, stillborns, etc.; there has only been one major outbreak - in Wales in 1977 - only 2 human cases	wild	Isolation	CHIROPTERA	PTEROPODIDAE	Pteropus	poliocephalus	Mononegavirales	Paramyxoviridae	Paramyxovirinae	Rubulavirus	15516	TRUE	FALSE	SS	RNA	enveloped	Barr et al. 2012; Center for Food Security and Public Health 2017	Calisher et al. 2006	0	702.78	1	180	187.72	184	26	0.65216	4	5	0.487124	0.692547	ssRNA(-)	1	reservoir_only
Menangle_virus	Pteropus_alecto	1	0	1	animal excreta	0	0	1	flu-like symptoms	1	low	Causes reproductive disease in pigs - e.g., birth abnormalities, stillborns, etc.; there has only been one major outbreak - in Wales in 1977 - only 2 human cases	wild	Isolation	CHIROPTERA	PTEROPODIDAE	Pteropus	alecto	Mononegavirales	Paramyxoviridae	Paramyxovirinae	Rubulavirus	15516	TRUE	FALSE	SS	RNA	enveloped	Barr et al. 2012; Center for Food Security and Public Health 2017	Wong et al. 2007; Philbey et al. 1998	0	610.13	1	53.9999	177.517	92	24	0.6727	3	3	0.487124	0.692547	ssRNA(-)	1	reservoir_only
Menangle_virus	Sus_scrofa	2	1	2	animal excreta	0	0	1	flu-like symptoms	1	low	Causes reproductive disease in pigs - e.g., birth abnormalities, stillborns, etc.; there has only been one major outbreak - in Wales in 1977 - only 2 human cases	domestic	Isolation	CETARTIODACTYLA	SUIDAE	Sus	scrofa	Mononegavirales	Paramyxoviridae	Paramyxovirinae	Rubulavirus	15516	TRUE	FALSE	SS	RNA	enveloped	Barr et al. 2012; Center for Food Security and Public Health 2017	Bowden et al. 2001	0	84471.5	4.52	252	115.2	3932	1671	0.67177	13	41	0.487124	0.692547	ssRNA(-)	1	int_host
Middle_eastern_respiratory_syndrome_coronavirus	Camelus_dromedarius	2	1	2	respiratory, direct/indirect contact with fomites	35.5	35.5	1	respiratory illness	2	high	Bats are probably the reservoir host, but this has not been confirmed yet	domestic	Isolation	ARTIODACTYLA	CAMELIDAE	Camelus	dromedarius	Niddovirales	Coronaviridae	NA	Betacoronavirus	30063	TRUE	FALSE	SS	RNA	enveloped	Dawson et al. 2019; https://www.who.int/csr/disease/coronavirus_infections/faq/en/	Raj et al. 2014	35.5	492714	0.98	480	386.51	1262	364	0.766609	1	4	NA	0.766609	ssRNA(+)	1	int_host
Mokola_virus	Lophuromys_sikapusi	1	0	4	saliva	50	50	1	encephalitis	1	low	Only 2 confirmed human cases - both lethal. Sporadically isolated from mammals across sub-Saharan Africa - majority from domestic cats. The only lyssavirus that has yet to be isolated from batsÉ it also has a lower case mortality	wild	Isolation	RODENTIA	MURIDAE	Lophuromys	sikapusi	Mononegavirales	Rhabdoviridae	NA	Lyssavirus	11943	TRUE	FALSE	SS	RNA	enveloped	Nel 2001; Familusi and Moore 1972. Isolation of a rabies related virus from the cerebrospinal fluid of a child with 'Aseptic Meningitis'; Familusi et al. 1972. A fatal human infection with Mokola virus	Saluzzo 1984	50	62.72	3	392.4	182.64	51	16	0.70638	1	3	NA	1.08869	ssRNA(-)	1	reservoir_only
Mokola_virus	Canis_lupus	2	1	4	saliva	50	50	1	encephalitis	1	low	Only 2 confirmed human cases - both lethal. Sporadically isolated from mammals across sub-Saharan Africa - majority from domestic cats. The only lyssavirus that has yet to be isolated from batsÉ it also has a lower case mortality	domestic	PCR	CARNIVORA	CANIDAE	Canis	lupus	Mononegavirales	Rhabdoviridae	NA	Lyssavirus	11940	TRUE	FALSE	SS	RNA	enveloped	Nel 2001; Familusi and Moore 1972. Isolation of a rabies related virus from the cerebrospinal fluid of a child with 'Aseptic Meningitis'; Familusi et al. 1972. A fatal human infection with Mokola virus	Sabeta et al. 2007	50	31756.5	4.98	354	63.5	3742	345	0.772511	1	3	1.24226	1.08869	ssRNA(-)	1	int_host
Mokola_virus	Crocidura_leucodon	1	0	4	saliva	50	50	1	encephalitis	1	low	Only 2 confirmed human cases - both lethal. Sporadically isolated from mammals across sub-Saharan Africa - majority from domestic cats. The only lyssavirus that has yet to be isolated from batsÉ it also has a lower case mortality	wild	Isolation	EULIPOTYPHLA	SORICIDAE	Crocidura	sp.	Mononegavirales	Rhabdoviridae	NA	Lyssavirus	11942	TRUE	FALSE	SS	RNA	enveloped	Nel 2001; Familusi and Moore 1972. Isolation of a rabies related virus from the cerebrospinal fluid of a child with 'Aseptic Meningitis'; Familusi et al. 1972. A fatal human infection with Mokola virus	Shope et al. 1970	50	10.88	3.36	36	30.99	242	39	0.849242	1	1	1.24226	1.08869	ssRNA(-)	1	reservoir_only
Mokola_virus	Felis_catus	2	1	4	saliva	50	50	1	encephalitis	1	low	Only 2 confirmed human cases - both lethal. Sporadically isolated from mammals across sub-Saharan Africa - majority from domestic cats. The only lyssavirus that has yet to be isolated from batsÉ it also has a lower case mortality	domestic	PCR	CARNIVORA	FELIDAE	Felis	catus	Mononegavirales	Rhabdoviridae	NA	Lyssavirus	11941	TRUE	FALSE	SS	RNA	enveloped	Nel 2001; Familusi and Moore 1972. Isolation of a rabies related virus from the cerebrospinal fluid of a child with 'Aseptic Meningitis'; Familusi et al. 1972. A fatal human infection with Mokola virus	Sabeta et al. 2007	50	2884.8	2.685	408	62.99	2495	1016	0.669865	4	14	1.24226	1.08869	ssRNA(-)	1	int_host
Monkeypox_virus	Cynomys_ludovicianus	1	1	2	direct/indirect contact, respiratory	11	11	1	lesions	3	high	Congo Basin strain(most cases) is more virulent than the West African strain - but we don't know why yet; First identified in a captive monkey (origin of the name monkeypox), but all confirmed non-human primate cases have been in captives or experimental infections	wild	PCR	RODENTIA	SCIURIDAE	Cynomys	ludovicianus	Group_I	Poxviridae	Chordopoxvirinae	Orthopoxvirus	196858	TRUE	FALSE	DS	DNA	enveloped	Kantele et al. 2016; Nolen et al. 2016; Saijo et al. 2009	Hutson et al.2007	11	797.05	4.43	102	33.46	595	99	0.794646	1	1	0.727787	0.794646	dsDNA	1	direct_host
Monkeypox_virus	Funisciurus_anerythrus	1	1	2	direct/indirect contact, respiratory	11	11	1	lesions	3	high	Congo Basin strain(most cases) is more virulent than the West African strain - but we don't know why yet; First identified in a captive monkey (origin of the name monkeypox), but all confirmed non-human primate cases have been in captives or experimental infections	wild	Isolation	RODENTIA	SCIURIDAE	Funisciurus	anerythrus	Group_I	Poxviridae	Chordopoxvirinae	Orthopoxvirus	196858	TRUE	FALSE	DS	DNA	enveloped	Kantele et al. 2016; Nolen et al. 2016; Saijo et al. 2009	Hutson et al.2007	11	223.54	1.32	114	54.23	15	3	0.768022	1	1	0.727787	0.794646	dsDNA	1	direct_host
Monkeypox_virus	Cercocebus_atys	2	0	3	direct/indirect contact, respiratory	11	11	1	lesions	3	high	Congo Basin strain(most cases) is more virulent than the West African strain - but we don't know why yet; First identified in a captive monkey (origin of the name monkeypox), but all confirmed non-human primate cases have been in captives or experimental infections	wild	Isolation	PRIMATES	CERCOPITHECIDAE	Cercocebus	atys	Group_I	Poxviridae	Chordopoxvirinae	Orthopoxvirus	196858	TRUE	FALSE	DS	DNA	enveloped	Kantele et al. 2016; Nolen et al. 2016; Saijo et al. 2009	Dabrowski et al. 2014	11	6941.24	1.01	321.6	165.08	119	28	0.406803	1	2	0.727787	0.794646	dsDNA	1	secondary_only
Monkeypox_virus	Funisciurus_congicus	1	1	2	direct/indirect contact, respiratory	11	11	1	lesions	3	high	Congo Basin strain(most cases) is more virulent than the West African strain - but we don't know why yet; First identified in a captive monkey (origin of the name monkeypox), but all confirmed non-human primate cases have been in captives or experimental infections	wild	Isolation	RODENTIA	SCIURIDAE	Funisciurus	congicus	Group_I	Poxviridae	Chordopoxvirinae	Orthopoxvirus	196858	TRUE	FALSE	DS	DNA	enveloped	Kantele et al. 2016; Nolen et al. 2016; Saijo et al. 2009	Khodakevich et al. 1986	11	112	2.44	114	54.23	15	1	0.768022	1	1	0.727787	0.794646	dsDNA	1	direct_host
Monkeypox_virus	Cricetomys_gambianus	1	1	2	direct/indirect contact, respiratory	11	11	1	lesions	3	high	Congo Basin strain(most cases) is more virulent than the West African strain - but we don't know why yet; First identified in a captive monkey (origin of the name monkeypox), but all confirmed non-human primate cases have been in captives or experimental infections	wild	PCR	RODENTIA	NESOMYIDAE	Cricetomys	gambianus	Group_I	Poxviridae	Chordopoxvirinae	Orthopoxvirus	196858	TRUE	FALSE	DS	DNA	enveloped	Kantele et al. 2016; Nolen et al. 2016; Saijo et al. 2009	CDC	11	1267.52	3.11	83.9999	31.45	224	71	0.711912	1	1	0.727787	0.794646	dsDNA	1	direct_host
New_York_virus	Peromyscus_leucopus	1	1	1	aerosolized excreta	50	50	1	hantavirus cardiopulmonary syndrome (HCPS)	1	high	Only 2 lab confirmed human cases	wild	PCR	RODENTIA	CRICETIDAE	Peromyscus	leucopus	Bunyavirales	Hantaviridae	NA	Orthohantavirus	15450	TRUE	TRUE	SS	RNA	enveloped	Knust and Rollin 2013; Huang et al. 1996. Hantavirus S RNA sequence from a fatal case of HPS in New York	Hjelle et al. 1995	50	18.07	4.27	38	23.17	1546	386	0.704613	4	4	0	0.704613	ssRNA(-)	1	direct_host
Nipah_virus	Pteropus_vampyrus	1	1	1	bat saliva or excrement	70	75	1	encephalitis	3	low	More respiratory symptoms in Bangladesh/India outbreaks - may have contributed to human-to-human transmission	wild	Isolation	CHIROPTERA	PTEROPODIDAE	Pteropus	vampyrus	Mononegavirales	Paramyxoviridae	Paramyxovirinae	Henipavirus	18246	TRUE	FALSE	SS	RNA	enveloped	Lo and Rota 2008; Luby et al 2006; Gurley et al. 2007. Person-to-person transmission of Nipah virus in a Bangladeshi community	Calisher et al. 2006	72.5	1027.54	0.99	179.76	177.517	65	11	0.676769	1	1	0.843489	0.890322	ssRNA(-)	1	direct_host
Nipah_virus	Sus_scrofa	2	1	4	pig excrement or tissues	40	40	1	encephalitis	1	low	One of the asymptomatic cases (Abdullah et al 2012) became symptomatic 11 years after initial exposure	wild	PCR	CETARTIODACTYLA	SUIDAE	Sus	scrofa	Mononegavirales	Paramyxoviridae	Paramyxovirinae	Henipavirus	18246	TRUE	FALSE	SS	RNA	enveloped	Parashur et al 2000; Hughes et al. 2009; Chong et al. 2008. Differences in the epidemiologic and clinical features of Nipah virus encephalitis between the Malaysian and Bangladesh outbreak; Luby et al 2016; Chua et al. 1999; Lam 2003; https://www.ncbi.nlm.nih.gov/pubmed/11189713	Hsu et al. 2004	40	84471.5	4.52	252	115.2	3932	1671	0.67177	13	41	0.843489	0.890322	ssRNA(-)	1	int_host
Nipah_virus	Pteropus_giganteus	1	1	1	bat saliva or excrement	70	75	1	encephalitis	3	low	More respiratory symptoms in Bangladesh/India outbreaks - may have contributed to human-to-human transmission	domestic	Isolation	CHIROPTERA	PTEROPODIDAE	Pteropus	giganteus	Mononegavirales	Paramyxoviridae	Paramyxovirinae	Henipavirus	18246	TRUE	FALSE	SS	RNA	enveloped	Lo and Rota 2008; Luby et al 2006; Gurley et al. 2007. Person-to-person transmission of Nipah virus in a Bangladeshi community	Calisher et al. 2006	72.5	824.85	0.99	376.8	166.59	204	13	0.663518	1	3	0.843489	0.890322	ssRNA(-)	1	direct_host
Nipah_virus	Pteropus_lylei	1	1	1	bat saliva or excrement	70	75	1	encephalitis	3	low	More respiratory symptoms in Bangladesh/India outbreaks - may have contributed to human-to-human transmission	wild	Isolation	CHIROPTERA	PTEROPODIDAE	Pteropus	lylei	Mononegavirales	Paramyxoviridae	Paramyxovirinae	Henipavirus	18246	TRUE	FALSE	SS	RNA	enveloped	Lo and Rota 2008; Luby et al 2006; Gurley et al. 2007. Person-to-person transmission of Nipah virus in a Bangladeshi community	Calisher et al.; http://www.uniprot.org/uniprot/Q2A069	72.5	319.75	0.99625	180	166	15	6	0.669689	2	5	0.843489	0.890322	ssRNA(-)	1	direct_host
Nipah_virus	Pteropus_hypomelanus	1	1	1	bat saliva or excrement	70	75	1	encephalitis	3	low	More respiratory symptoms in Bangladesh/India outbreaks - may have contributed to human-to-human transmission	wild	Isolation	CHIROPTERA	PTEROPODIDAE	Pteropus	hypomelanus	Mononegavirales	Paramyxoviridae	Paramyxovirinae	Henipavirus	18246	TRUE	FALSE	SS	RNA	enveloped	Lo and Rota 2008; Luby et al 2006; Gurley et al. 2007. Person-to-person transmission of Nipah virus in a Bangladeshi community	Calisher et al. 2006	72.5	435.61	1	108	195	58	9	0.661831	3	4	0.843489	0.890322	ssRNA(-)	1	direct_host
Nipah_virus	Eonycteris_spelaea	1	1	1	bat saliva or excrement	70	75	1	encephalitis	3	low	More respiratory symptoms in Bangladesh/India outbreaks - may have contributed to human-to-human transmission	wild	Isolation	CHIROPTERA	PTEROPODIDAE	Eonycteris	spelaea	Mononegavirales	Paramyxoviridae	Paramyxovirinae	Henipavirus	18246	TRUE	FALSE	SS	RNA	enveloped	Lo and Rota 2008; Luby et al 2006; Gurley et al. 2007. Person-to-person transmission of Nipah virus in a Bangladeshi community	Calisher et al. 2006	72.5	58.7	1	60	152.18	82	23	0.679287	2	3	0.843489	0.890322	ssRNA(-)	1	direct_host
Nipah_virus	Cynopterus_brachyotis	1	1	1	bat saliva or excrement	70	75	1	encephalitis	3	low	More respiratory symptoms in Bangladesh/India outbreaks - may have contributed to human-to-human transmission	wild	Isolation	CHIROPTERA	PTEROPODIDAE	Cynopterus	brachyotis	Mononegavirales	Paramyxoviridae	Paramyxovirinae	Henipavirus	18246	TRUE	FALSE	SS	RNA	enveloped	Lo and Rota 2008; Luby et al 2006; Gurley et al. 2007. Person-to-person transmission of Nipah virus in a Bangladeshi community	WHO	72.5	33.87	0.99	96	117.06	111	17	0.65123	2	3	0.843489	0.890322	ssRNA(-)	1	direct_host
Nipah_virus	Hipposideros_larvatus	1	1	1	bat saliva or excrement	70	75	1	encephalitis	3	low	More respiratory symptoms in Bangladesh/India outbreaks - may have contributed to human-to-human transmission	wild	Isolation	CHIROPTERA	HIPPOSIDERIDAE	Hipposideros	larvatus	Mononegavirales	Paramyxoviridae	Paramyxovirinae	Henipavirus	18246	TRUE	FALSE	SS	RNA	enveloped	Lo and Rota 2008; Luby et al 2006; Gurley et al. 2007. Person-to-person transmission of Nipah virus in a Bangladeshi community; https://www.ncbi.nlm.nih.gov/pmc/articles/PMC3371782/	Calisher et al. 2006	72.5	19.95	0.98	144	161.65	47	7	0.708001	1	1	0.843489	0.890322	ssRNA(-)	1	direct_host
Orf_virus	Ovibos_moschatus	2	0	2	contact with lesions, direct/indirect contact with fomites	0	0	1	lesions	1	high		wild	PCR	CETARTIODACTYLA	BOVIDAE	Ovibos	moschatus	Group_I	Poxviridae	Chordopoxvirinae	Parapoxvirus	139962	TRUE	FALSE	DS	DNA	enveloped	Barraviera 2005; https://emedicine.medscape.com/article/1133450-overview#a5	Vikoren et al. 2008	0	312500	1.01	288	256.26	715	84	0.698879	1	2	0.371123	0.748149	dsDNA	1	secondary_only
Orf_virus	Ovis_aries	1	1	2	contact with lesions, direct/indirect contact with fomites	0	0	1	lesions	1	high		domestic	PCR	CETARTIODACTYLA	BOVIDAE	Ovis	aries	Group_I	Poxviridae	Chordopoxvirinae	Parapoxvirus	139962	TRUE	FALSE	DS	DNA	enveloped	Barraviera 2005; https://emedicine.medscape.com/article/1133450-overview#a6	Vikoren et al. 2008	0	39097.9	1.19	230.04	152.54	3212	2019	0.745671	6	26	0.371123	0.748149	dsDNA	1	direct_host
Orf_virus	Rangifer_tarandus	1	1	2	contact with lesions, direct/indirect contact with fomites	0	0	1	lesions	1	high		domestic	PCR	CETARTIODACTYLA	CERVIDAE	Rangifer	tarandus	Group_I	Poxviridae	Chordopoxvirinae	Parapoxvirus	139962	TRUE	FALSE	DS	DNA	enveloped	Barraviera 2005; https://emedicine.medscape.com/article/1133450-overview#a3	Vikoren et al. 2008	0	109088	2	242.4	222.5	3545	561	0.748149	2	6	0.371123	0.748149	dsDNA	1	direct_host
Orf_virus	Capra_hircus	1	1	2	contact with lesions, direct/indirect contact with fomites	0	0	1	lesions	1	high		domestic	PCR	CETARTIODACTYLA	BOVIDAE	Capra	hircus	Group_I	Poxviridae	Chordopoxvirinae	Parapoxvirus	139962	TRUE	FALSE	DS	DNA	enveloped	Vikoren et al. 2008; Barraviera 2005; https://emedicine.medscape.com/article/1133450-overview#a4	Vikoren et al. 2008	0	47386.5	1.45	249.6	156	1557	796	0.650447	5	18	0.371123	0.748149	dsDNA	1	direct_host
Pseudocowpox_virus	Felis_catus	2	0	2	contact with lesions, direct/indirect contact with fomites	0	0	1	lesions	1	high	Recombination rate proxied with cowpox	domestic	PCR	CARNIVORA	FELIDAE	Felis	catus	Group_I	Poxviridae	Chordopoxvirinae	Parapoxvirus	139229	TRUE	FALSE	DS	DNA	enveloped	Barraviera 2005; Adriano et al. 2015	Fairley et al. 2013	0	2884.8	2.685	408	62.99	2495	1016	0.669865	4	14	0	0.682652	dsDNA	1	secondary_only
Pseudocowpox_virus	Bos_taurus	1	1	2	contact with lesions, direct/indirect contact with fomites	0	0	1	lesions	1	high	Recombination rate proxied with cowpox	domestic	Isolation	CETARTIODACTYLA	BOVIDAE	Bos	taurus	Group_I	Poxviridae	Chordopoxvirinae	Parapoxvirus	139229	TRUE	FALSE	DS	DNA	enveloped	Barraviera 2005; Adriano et al. 2015	Friedman-Kien et al. 1962	0	618642	1	240	280.48	4238	2742	0.682652	11	46	0	0.682652	dsDNA	1	direct_host
Puumala_virus	Myodes_glareolus	1	1	1	aerosolized excreta, or saliva (via bite)	0.1	1	1	nephropathia epidemica (mild hemorrhagic fever with renal syndrome)	1	high		wild	PCR	RODENTIA	CRICETIDAE	Myodes	glareolus	Bunyavirales	Hantaviridae	NA	Orthohantavirus	12062	TRUE	TRUE	SS	RNA	enveloped	Voutilainen et al. 2015	Acha & Szyfres 2003; Yanagihara et al. 1984	0.55	20.73	4.31	58.8	19.74	112	38	0.657799	5	10	0.613141	0.708417	ssRNA(-)	1	direct_host
Puumala_virus	Rhinolophus_ferrumequinum	1	0	1	aerosolized excreta, or saliva (via bite)	0.1	1	1	nephropathia epidemica (mild hemorrhagic fever with renal syndrome)	1	high		wild	PCR	CHIROPTERA	RHINOLOPHIDAE	Rhinolophus	ferrumequinum	Bunyavirales	Hantaviridae	NA	Orthohantavirus	12062	TRUE	TRUE	SS	RNA	enveloped	Lee et al. 1998; Yun et al. 1999	Lee et al. 1998; Yun et al. 1999	0.55	22.59	0.98	360	91.24	782	121	0.678446	6	6	0.613141	0.708417	ssRNA(-)	1	reservoir_only
Puumala_virus	Ondatra_zibethicus	1	1	1	aerosolized excreta, or saliva (via bite)	0.1	1	1	nephropathia epidemica (mild hemorrhagic fever with renal syndrome)	1	high		wild	PCR	RODENTIA	CRICETIDAE	Ondatra	zibethicus	Bunyavirales	Hantaviridae	NA	Orthohantavirus	12062	TRUE	TRUE	SS	RNA	enveloped	Vahlenkamp et al. 1998	Vahlenkamp et al. 1998	0.55	991.31	6.55	120	27.86	983	176	0.708417	1	1	0.613141	0.708417	ssRNA(-)	1	direct_host
Puumala_virus	Myodes_regulus	1	1	1	aerosolized excreta, or saliva (via bite)	0.1	1	1	nephropathia epidemica (mild hemorrhagic fever with renal syndrome)	1	high		wild	PCR	RODENTIA	CRICETIDAE	Myodes	regulus	Bunyavirales	Hantaviridae	NA	Orthohantavirus	12062	TRUE	TRUE	SS	RNA	enveloped	Plyusnina et al. 2008	Plyusnina et al. 2008	0.55	25.7	4.973	41.4	20.573	13	8	0.669032	1	1	0.613141	0.708417	ssRNA(-)	1	direct_host
Puumala_virus	Myodes_rufocanus	1	1	1	aerosolized excreta, or saliva (via bite)	0.1	1	1	nephropathia epidemica (mild hemorrhagic fever with renal syndrome)	1	high		wild	Isolation	RODENTIA	CRICETIDAE	Myodes	rufocanus	Bunyavirales	Hantaviridae	NA	Orthohantavirus	12062	TRUE	TRUE	SS	RNA	enveloped	Yanagihara et al. 1984	Yanagihara et al. 1984	0.55	36.43	5.01	24	18	34	6	0.674	2	2	0.613141	0.708417	ssRNA(-)	1	direct_host
Rabies_virus	Artibeus_fimbriatus	1	1	4	saliva	100	100	1	encephalitis	1	low		wild	Isolation	CHIROPTERA	PHYLLOSTOMIDAE	Artibeus	fimbriatus	Mononegavirales	Rhabdoviridae	NA	Lyssavirus	11932	TRUE	FALSE	SS	RNA	enveloped	Kuzmin et al. 2011	Cunha et al. 2005	100	63.89	1	120	122.575	39	11	0.764181	1	1	1.24226	1.08869	ssRNA(-)	1	direct_host
Rabies_virus	Cynopterus_brachyotis	1	1	4	saliva	100	100	1	encephalitis	1	low		wild	Isolation	CHIROPTERA	PTEROPODIDAE	Cynopterus	brachyotis	Mononegavirales	Rhabdoviridae	NA	Lyssavirus	11932	TRUE	FALSE	SS	RNA	enveloped	Kuzmin et al. 2011	Smith et al. 1967	100	33.87	0.99	96	117.06	111	17	0.65123	2	3	1.24226	1.08869	ssRNA(-)	1	direct_host
Rabies_virus	Diclidurus_albus	1	1	4	saliva	100	100	1	encephalitis	1	low		wild	Isolation	CHIROPTERA	EMBALLONURIDAE	Diclidurus	albus	Mononegavirales	Rhabdoviridae	NA	Lyssavirus	11932	TRUE	FALSE	SS	RNA	enveloped	Kuzmin et al. 2011	Goodwin & Greenhall 1961	100	16.56	1	60	91.24	9	1	0.778206	1	1	1.24226	1.08869	ssRNA(-)	1	direct_host
Rabies_virus	Nyctinomops_macrotis	1	1	4	saliva	100	100	1	encephalitis	1	low		wild	Isolation	CHIROPTERA	MOLOSSIDAE	Nyctinomops	macrotis	Mononegavirales	Rhabdoviridae	NA	Lyssavirus	11932	TRUE	FALSE	SS	RNA	enveloped	Kuzmin et al. 2011	Passos et al. 1998	100	16.38	0.99	60	91.2501	31	9	0.740525	1	1	1.24226	1.08869	ssRNA(-)	1	direct_host
Rabies_virus	Chrotopterus_auritus	1	1	4	saliva	100	100	1	encephalitis	1	low		wild	Isolation	CHIROPTERA	PHYLLOSTOMIDAE	Chrotopterus	auritus	Mononegavirales	Rhabdoviridae	NA	Lyssavirus	11932	TRUE	FALSE	SS	RNA	enveloped	Kuzmin et al. 2011	Silva et al. 1968	100	78.26	0.99	120	86.09	49	4	0.792007	1	1	1.24226	1.08869	ssRNA(-)	1	direct_host
Rabies_virus	Desmodus_rotundus	1	1	4	saliva	100	100	1	encephalitis	1	low		wild	Isolation	CHIROPTERA	PHYLLOSTOMIDAE	Desmodus	rotundus	Mononegavirales	Rhabdoviridae	NA	Lyssavirus	11932	TRUE	FALSE	SS	RNA	enveloped	Kuzmin et al. 2011	Kobayashi et al. 2005	100	33.16	1	234	209.35	434	120	0.733674	1	3	1.24226	1.08869	ssRNA(-)	1	direct_host
Rabies_virus	Vespertilio_murinus	1	1	4	saliva	100	100	1	encephalitis	1	low		wild	Isolation	CHIROPTERA	VESPERTILIONIDAE	Vespertilio	murinus	Mononegavirales	Rhabdoviridae	NA	Lyssavirus	11932	TRUE	FALSE	SS	RNA	enveloped	Kuzmin et al. 2011	Selimov et al. 1991	100	15.42	1.5	144	52.14	281	24	1.01033	2	2	1.24226	1.08869	ssRNA(-)	1	direct_host
Rabies_virus	Proteles_cristata	2	0	4	saliva	100	100	1	encephalitis	1	low		wild	PCR	CARNIVORA	HYAENIDAE	Proteles	cristata	Mononegavirales	Rhabdoviridae	NA	Lyssavirus	11932	TRUE	FALSE	SS	RNA	enveloped	Stuchin et al. 2018	Lembo et al. 2008	100	8139.39	2.64	300	90.62	4	1	0.661609	1	1	1.24226	1.08869	ssRNA(-)	1	secondary_only
Rabies_virus	Elephas_maximus	2	0	4	saliva	100	100	1	encephalitis	1	low		domestic	PCR	PROBOSCIDEA	ELEPHANTIDAE	Elephas	maximus	Mononegavirales	Rhabdoviridae	NA	Lyssavirus	11932	TRUE	FALSE	SS	RNA	enveloped	Stuchin et al. 2018	Nanayakkara et al. 2003	100	3.26979e+06	1.41	960	634.49	1892	346	0.916423	1	3	1.24226	1.08869	ssRNA(-)	1	secondary_only
Rabies_virus	Canis_latrans	1	1	4	saliva	100	100	1	encephalitis	1	low		wild	Isolation	CARNIVORA	CANIDAE	Canis	latrans	Mononegavirales	Rhabdoviridae	NA	Lyssavirus	11932	TRUE	FALSE	SS	RNA	enveloped	https://www.who-rabies-bulletin.org/site-page/epidemiology-rabies	Behymer et al. 1974	100	11989.1	5.72	262	61.74	1817	358	0.754987	1	4	1.24226	1.08869	ssRNA(-)	1	direct_host
Rabies_virus	Uroderma_bilobatum	1	1	4	saliva	100	100	1	encephalitis	1	low		wild	Isolation	CHIROPTERA	PHYLLOSTOMIDAE	Uroderma	bilobatum	Mononegavirales	Rhabdoviridae	NA	Lyssavirus	11932	TRUE	FALSE	SS	RNA	enveloped	Kuzmin et al. 2011	Nunes et al. 2008	100	16.28	0.99	125	130.88	54	4	0.76822	1	3	1.24226	1.08869	ssRNA(-)	1	direct_host
Rabies_virus	Myotis_nigricans	1	1	4	saliva	100	100	1	encephalitis	1	low		wild	Isolation	CHIROPTERA	VESPERTILIONIDAE	Myotis	nigricans	Mononegavirales	Rhabdoviridae	NA	Lyssavirus	11932	TRUE	FALSE	SS	RNA	enveloped	Kuzmin et al. 2011	Cisterna et al. 2005	100	4.2	1	84	61.95	100	30	0.917884	1	1	1.24226	1.08869	ssRNA(-)	1	direct_host
Rabies_virus	Hydrochoerus_hydrochaeris	2	0	4	saliva	100	100	1	encephalitis	1	low		wild	Isolation	RODENTIA	CAVIIDAE	Hydrochoerus	hydrochaeris	Mononegavirales	Rhabdoviridae	NA	Lyssavirus	11932	TRUE	FALSE	SS	RNA	enveloped	Stuchin et al. 2018	Delpietro et al. 2009	100	48144.9	3.49	144	150.73	208	61	0.774372	1	1	1.24226	1.08869	ssRNA(-)	1	secondary_only
Rabies_virus	Antrozous_pallidus	1	1	4	saliva	100	100	1	encephalitis	1	low		wild	PCR	CHIROPTERA	VESPERTILIONIDAE	Antrozous	pallidus	Mononegavirales	Rhabdoviridae	NA	Lyssavirus	11932	TRUE	FALSE	SS	RNA	enveloped	Kuzmin et al. 2011	Blanton et al. 2008	100	22.24	1.78	109.2	59.01	192	21	0.894852	1	1	1.24226	1.08869	ssRNA(-)	1	direct_host
Rabies_virus	Capra_hircus	2	0	4	saliva	100	100	1	encephalitis	1	low		domestic	PCR	CETARTIODACTYLA	BOVIDAE	Capra	hircus	Mononegavirales	Rhabdoviridae	NA	Lyssavirus	11932	TRUE	FALSE	SS	RNA	enveloped	Stuchin et al. 2018	Kuzmin et al. 2004	100	47386.5	1.45	249.6	156	1557	796	0.650447	5	18	1.24226	1.08869	ssRNA(-)	1	secondary_only
Rabies_virus	Pipistrellus_subflavus	1	1	4	saliva	100	100	1	encephalitis	1	low		wild	PCR	CHIROPTERA	VESPERTILIONIDAE	Pipistrellus	subflavus	Mononegavirales	Rhabdoviridae	NA	Lyssavirus	11932	TRUE	FALSE	SS	RNA	enveloped	Kuzmin et al. 2011	Blanton et al. 2008	100	5.74	1.96	180	45.71	205	18	0.896574	1	1	1.24226	1.08869	ssRNA(-)	1	direct_host
Rabies_virus	Pteronotus_davyi	1	1	4	saliva	100	100	1	encephalitis	1	low		wild	Isolation	CHIROPTERA	MORMOOPIDAE	Pteronotus	davyi	Mononegavirales	Rhabdoviridae	NA	Lyssavirus	11932	TRUE	FALSE	SS	RNA	enveloped	Kuzmin et al. 2011	Goodwin & Greenhall 1961	100	9.52	0.99	179.76	60	44	7	0.723791	1	1	1.24226	1.08869	ssRNA(-)	1	direct_host
Rabies_virus	Diaemus_youngi	1	1	4	saliva	100	100	1	encephalitis	1	low		wild	Isolation	CHIROPTERA	PHYLLOSTOMIDAE	Diaemus	youngi	Mononegavirales	Rhabdoviridae	NA	Lyssavirus	11932	TRUE	FALSE	SS	RNA	enveloped	Kuzmin et al. 2011	Castilho et al. 2008	100	36.71	1	240	258	55	9	0.751389	1	1	1.24226	1.08869	ssRNA(-)	1	direct_host
Rabies_virus	Myotis_riparius	1	1	4	saliva	100	100	1	encephalitis	1	low		wild	PCR	CHIROPTERA	VESPERTILIONIDAE	Myotis	riparius	Mononegavirales	Rhabdoviridae	NA	Lyssavirus	11932	TRUE	FALSE	SS	RNA	enveloped	Kuzmin et al. 2011	da Rosa et al. 2011	100	4.57	0.98	252	61.95	32	10	0.881472	1	1	1.24226	1.08869	ssRNA(-)	1	direct_host
Rabies_virus	Artibeus_jamaicensis	1	1	4	saliva	100	100	1	encephalitis	1	low		wild	Isolation	CHIROPTERA	PHYLLOSTOMIDAE	Artibeus	planirostris	Mononegavirales	Rhabdoviridae	NA	Lyssavirus	11932	TRUE	FALSE	SS	RNA	enveloped	Kuzmin et al. 2011	Kobayashi et al. 2007	100	43.63	1	120	138.7	302	38	0.805765	1	3	1.24226	1.08869	ssRNA(-)	1	direct_host
Rabies_virus	Artibeus_jamaicensis	1	1	4	saliva	100	100	1	encephalitis	1	low		wild	Isolation	CHIROPTERA	PHYLLOSTOMIDAE	Artibeus	jamaicensis	Mononegavirales	Rhabdoviridae	NA	Lyssavirus	11932	TRUE	FALSE	SS	RNA	enveloped	Kuzmin et al. 2011	Price & Everard 1977	100	43.63	1	120	138.7	302	38	0.805765	1	3	1.24226	1.08869	ssRNA(-)	1	direct_host
Rabies_virus	Lasionycteris_noctivagans	1	1	4	saliva	100	100	1	encephalitis	1	low		wild	PCR	CHIROPTERA	VESPERTILIONIDAE	Lasionycteris	noctivagans	Mononegavirales	Rhabdoviridae	NA	Lyssavirus	11932	TRUE	FALSE	SS	RNA	enveloped	Kuzmin et al. 2011	Blanton et al. 2008	100	11.02	1.77	144	53.55	209	25	0.84945	1	1	1.24226	1.08869	ssRNA(-)	1	direct_host
Rabies_virus	Myotis_grisescens	1	1	4	saliva	100	100	1	encephalitis	1	low		wild	PCR	CHIROPTERA	VESPERTILIONIDAE	Myotis	grisescens	Mononegavirales	Rhabdoviridae	NA	Lyssavirus	11932	TRUE	FALSE	SS	RNA	enveloped	Kuzmin et al. 2011	Blanton et al. 2008	100	10.84	0.99	471.24	61.95	144	11	0.88979	1	1	1.24226	1.08869	ssRNA(-)	1	direct_host
Rabies_virus	Artibeus_lituratus	1	1	4	saliva	100	100	1	encephalitis	1	low		wild	Isolation	CHIROPTERA	PHYLLOSTOMIDAE	Artibeus	lituratus	Mononegavirales	Rhabdoviridae	NA	Lyssavirus	11932	TRUE	FALSE	SS	RNA	enveloped	Kuzmin et al. 2011	Kobayashi et al. 2005	100	59.3	1	120	106.45	199	54	0.836713	1	2	1.24226	1.08869	ssRNA(-)	1	direct_host
Rabies_virus	Atilax_paludinosus	1	1	4	saliva	100	100	1	encephalitis	1	low		wild	PCR	CARNIVORA	HERPESTIDAE	Atilax	paludinosus	Mononegavirales	Rhabdoviridae	NA	Lyssavirus	11932	TRUE	FALSE	SS	RNA	enveloped	Kaplan 1969; https://www.cdc.gov/rabies/exposure/animals/wildlife_reservoirs.html	van Zyl et al. 2010	100	3600.16	2	209	77.27	59	6	0.643295	1	1	1.24226	1.08869	ssRNA(-)	1	direct_host
Rabies_virus	Eptesicus_brasiliensis	1	1	4	saliva	100	100	1	encephalitis	1	low		wild	Isolation	CHIROPTERA	VESPERTILIONIDAE	Eptesicus	brasiliensis	Mononegavirales	Rhabdoviridae	NA	Lyssavirus	11932	TRUE	FALSE	SS	RNA	enveloped	Kuzmin et al. 2011	Paez et al. 2003	100	9.2	1.46	405	205.887	89	22	0.932603	1	1	1.24226	1.08869	ssRNA(-)	1	direct_host
Rabies_virus	Eptesicus_diminutus	1	1	4	saliva	100	100	1	encephalitis	1	low		wild	Isolation	CHIROPTERA	VESPERTILIONIDAE	Eptesicus	diminutus	Mononegavirales	Rhabdoviridae	NA	Lyssavirus	11932	TRUE	FALSE	SS	RNA	enveloped	Kuzmin et al. 2011	Sodre et al. 2010; Favoretto et al. 2002	100	5.99	1.68	259.312	104.002	11	2	0.952623	1	1	1.24226	1.08869	ssRNA(-)	1	direct_host
Rabies_virus	Canis_simensis	2	0	4	saliva	100	100	1	encephalitis	1	low		wild	Isolation	CARNIVORA	CANIDAE	Canis	simensis	Mononegavirales	Rhabdoviridae	NA	Lyssavirus	11932	TRUE	FALSE	SS	RNA	enveloped	Stuchin et al. 2018	Sillero-Zubiri et al. 1996	100	14361.9	4	230.25	63.61	69	16	0.742569	1	4	1.24226	1.08869	ssRNA(-)	1	secondary_only
Rabies_virus	Molossus_rufus	1	1	4	saliva	100	100	1	encephalitis	1	low		wild	Isolation	CHIROPTERA	MOLOSSIDAE	Molossus	rufus	Mononegavirales	Rhabdoviridae	NA	Lyssavirus	11932	TRUE	FALSE	SS	RNA	enveloped	Kuzmin et al. 2011	Kobayashi et al. 2005	100	13.7	0.99	67.1999	107.97	31	12	0.748778	1	1	1.24226	1.08869	ssRNA(-)	1	direct_host
Rabies_virus	Nyctinomops_laticaudatus	1	1	4	saliva	100	100	1	encephalitis	1	low		wild	Isolation	CHIROPTERA	MOLOSSIDAE	Nyctinomops	laticaudatus	Mononegavirales	Rhabdoviridae	NA	Lyssavirus	11932	TRUE	FALSE	SS	RNA	enveloped	Kuzmin et al. 2011	Cunha et al. 2010	100	13.12	0.99	60	91.2501	26	7	0.774297	1	1	1.24226	1.08869	ssRNA(-)	1	direct_host
Rabies_virus	Ichneumia_albicauda	1	1	4	saliva	100	100	1	encephalitis	1	low		wild	PCR	CARNIVORA	HERPESTIDAE	Ichneumia	albicauda	Mononegavirales	Rhabdoviridae	NA	Lyssavirus	11932	TRUE	FALSE	SS	RNA	enveloped	Kaplan 1969; https://www.cdc.gov/rabies/exposure/animals/wildlife_reservoirs.html	Lembo et al. 2008	100	3628.4	2.35	144	77	34	5	0.66891	2	2	1.24226	1.08869	ssRNA(-)	1	direct_host
Rabies_virus	Macrotus_californicus	1	1	4	saliva	100	100	1	encephalitis	1	low		wild	Isolation	CHIROPTERA	PHYLLOSTOMIDAE	Macrotus	californicus	Mononegavirales	Rhabdoviridae	NA	Lyssavirus	11932	TRUE	FALSE	SS	RNA	enveloped	Kuzmin et al. 2011	Constantine 1979	100	11.83	1	124.8	250.29	50	7	0.771365	1	1	1.24226	1.08869	ssRNA(-)	1	direct_host
Rabies_virus	Vulpes_vulpes	1	1	4	saliva	100	100	1	encephalitis	1	low		wild	PCR	CARNIVORA	CANIDAE	Vulpes	vulpes	Mononegavirales	Rhabdoviridae	NA	Lyssavirus	11932	TRUE	FALSE	SS	RNA	enveloped	https://www.who-rabies-bulletin.org/site-page/epidemiology-rabies	Nadin-Davies et al. 1994	100	4820.36	4.59	180	52.5	4433	1477	0.773731	2	3	1.24226	1.08869	ssRNA(-)	1	direct_host
Rabies_virus	Myotis_evotis	1	1	4	saliva	100	100	1	encephalitis	1	low		wild	PCR	CHIROPTERA	VESPERTILIONIDAE	Myotis	evotis	Mononegavirales	Rhabdoviridae	NA	Lyssavirus	11932	TRUE	FALSE	SS	RNA	enveloped	Kuzmin et al. 2011	Blanton et al. 2008	100	6.91	0.98	264	60	87	7	0.873706	1	1	1.24226	1.08869	ssRNA(-)	1	direct_host
Rabies_virus	Felis_nigripes	2	0	4	saliva	100	100	1	encephalitis	1	low		wild	PCR	CARNIVORA	FELIDAE	Felis	nigripes	Mononegavirales	Rhabdoviridae	NA	Lyssavirus	11932	TRUE	FALSE	SS	RNA	enveloped	Stuchin et al. 2018	van Zyl et al. 2009	100	1362.77	1.78	144	67.5	50	7	0.670308	1	1	1.24226	1.08869	ssRNA(-)	1	secondary_only
Rabies_virus	Lycaon_pictus	2	0	4	saliva	100	100	1	encephalitis	1	low		wild	PCR	CARNIVORA	CANIDAE	Lycaon	pictus	Mononegavirales	Rhabdoviridae	NA	Lyssavirus	11932	TRUE	FALSE	SS	RNA	enveloped	Gascoyne et al. 1993	Lembo et al. 2008	100	22000	8.1	132	71.18	440	78	0.775389	1	2	1.24226	1.08869	ssRNA(-)	1	secondary_only
Rabies_virus	Mephitis_mephitis	1	1	4	saliva	100	100	1	encephalitis	1	low		wild	PCR	CARNIVORA	MEPHITIDAE	Mephitis	mephitis	Mononegavirales	Rhabdoviridae	NA	Lyssavirus	11932	TRUE	FALSE	SS	RNA	enveloped	https://www.cdc.gov/rabies/exposure/animals/wildlife_reservoirs.html	Nadin-Davies et al. 1994	100	2399.99	5.7	155	63.29	538	246	0.777699	1	2	1.24226	1.08869	ssRNA(-)	1	direct_host
Rabies_virus	Eumops_auripendulus	1	1	4	saliva	100	100	1	encephalitis	1	low		wild	Isolation	CHIROPTERA	MOLOSSIDAE	Eumops	auripendulus	Mononegavirales	Rhabdoviridae	NA	Lyssavirus	11932	TRUE	FALSE	SS	RNA	enveloped	Kuzmin et al. 2011	Kobayashi et al. 2005	100	28.49	0.98	144	85	22	5	0.756164	1	1	1.24226	1.08869	ssRNA(-)	1	direct_host
Rabies_virus	Phyllostomus_hastatus	1	1	4	saliva	100	100	1	encephalitis	1	low		wild	Isolation	CHIROPTERA	PHYLLOSTOMIDAE	Phyllostomus	hastatus	Mononegavirales	Rhabdoviridae	NA	Lyssavirus	11932	TRUE	FALSE	SS	RNA	enveloped	Kuzmin et al. 2011	De Yosti et al. 1970	100	91.44	0.99	120	123.39	148	31	0.755225	1	2	1.24226	1.08869	ssRNA(-)	1	direct_host
Rabies_virus	Eumops_patagonicus	1	1	4	saliva	100	100	1	encephalitis	1	low		wild	Isolation	CHIROPTERA	MOLOSSIDAE	Eumops	patagonicus	Mononegavirales	Rhabdoviridae	NA	Lyssavirus	11932	TRUE	FALSE	SS	RNA	enveloped	Kuzmin et al. 2011	Cisterna et al. 2005	100	38.55	1.003	144	85	8	2	0.756164	1	1	1.24226	1.08869	ssRNA(-)	1	direct_host
Rabies_virus	Eptesicus_furinalis	1	1	4	saliva	100	100	1	encephalitis	1	low		wild	Isolation	CHIROPTERA	VESPERTILIONIDAE	Eptesicus	furinalis	Mononegavirales	Rhabdoviridae	NA	Lyssavirus	11932	TRUE	FALSE	SS	RNA	enveloped	Kuzmin et al. 2011	Kobayashi et al. 2005	100	7.7	1.86	320.25	92.54	35	13	0.948872	1	1	1.24226	1.08869	ssRNA(-)	1	direct_host
Rabies_virus	Nycticeius_humeralis	1	1	4	saliva	100	100	1	encephalitis	1	low		wild	PCR	CHIROPTERA	VESPERTILIONIDAE	Nycticeius	humeralis	Mononegavirales	Rhabdoviridae	NA	Lyssavirus	11932	TRUE	FALSE	SS	RNA	enveloped	Kuzmin et al. 2011	Blanton et al. 2008	100	9.12	1.94	60	91.2501	146	16	1.00375	1	1	1.24226	1.08869	ssRNA(-)	1	direct_host
Rabies_virus	Felis_catus	1	1	4	saliva	100	100	1	encephalitis	1	low		domestic	PCR	CARNIVORA	FELIDAE	Felis	catus	Mononegavirales	Rhabdoviridae	NA	Lyssavirus	11932	TRUE	FALSE	SS	RNA	enveloped	Eng and Fishbein 1990. Epidemiological factors, clinical findings, and vaccination status of rabies in cats and dogs in the United States in 1998. http://europepmc.org/abstract/MED/2384321	Nadin-Davies et al. 1994	100	2884.8	2.685	408	62.99	2495	1016	0.669865	4	14	1.24226	1.08869	ssRNA(-)	1	direct_host
Rabies_virus	Pseudalopex_vetulus	1	1	4	saliva	100	100	1	encephalitis	1	low		wild	Isolation	CARNIVORA	CANIDAE	Pseudalopex	vetulus	Mononegavirales	Rhabdoviridae	NA	Lyssavirus	11932	TRUE	FALSE	SS	RNA	enveloped	https://www.who-rabies-bulletin.org/site-page/epidemiology-rabies	Silva et al. 2009	100	4233.47	3	164.4	60.8334	9	4	0.782636	1	1	1.24226	1.08869	ssRNA(-)	1	direct_host
Rabies_virus	Myotis_californicus	1	1	4	saliva	100	100	1	encephalitis	1	low		wild	PCR	CHIROPTERA	VESPERTILIONIDAE	Myotis	californicus	Mononegavirales	Rhabdoviridae	NA	Lyssavirus	11932	TRUE	FALSE	SS	RNA	enveloped	Kuzmin et al. 2011	Blanton et al. 2008	100	4.39	0.99	180	61.95	94	11	0.890586	1	1	1.24226	1.08869	ssRNA(-)	1	direct_host
Rabies_virus	Myotis_septentrionalis	1	1	4	saliva	100	100	1	encephalitis	1	low		wild	PCR	CHIROPTERA	VESPERTILIONIDAE	Myotis	septentrionalis	Mononegavirales	Rhabdoviridae	NA	Lyssavirus	11932	TRUE	FALSE	SS	RNA	enveloped	Kuzmin et al. 2011	Blanton et al. 2008	100	8.63	1.039	234.37	61.95	156	14	0.884714	1	1	1.24226	1.08869	ssRNA(-)	1	direct_host
Rabies_virus	Diphylla_ecaudata	1	1	4	saliva	100	100	1	encephalitis	1	low		wild	Isolation	CHIROPTERA	PHYLLOSTOMIDAE	Diphylla	ecaudata	Mononegavirales	Rhabdoviridae	NA	Lyssavirus	11932	TRUE	FALSE	SS	RNA	enveloped	Kuzmin et al. 2011	Castilho et al. 2010	100	28.11	0.99	95.9999	243.334	51	8	0.811722	1	1	1.24226	1.08869	ssRNA(-)	1	direct_host
Rabies_virus	Vulpes_corsac	1	1	4	saliva	100	100	1	encephalitis	1	low		wild	PCR	CARNIVORA	CANIDAE	Vulpes	corsac	Mononegavirales	Rhabdoviridae	NA	Lyssavirus	11932	TRUE	FALSE	SS	RNA	enveloped	https://www.who-rabies-bulletin.org/site-page/epidemiology-rabies	Kuzmin et al. 2004	100	2615.33	5.62	156	54.99	70	22	0.773731	1	1	1.24226	1.08869	ssRNA(-)	1	direct_host
Rabies_virus	Corynorhinus_townsendii	1	1	4	saliva	100	100	1	encephalitis	1	low		wild	Isolation	CHIROPTERA	VESPERTILIONIDAE	Corynorhinus	townsendii	Mononegavirales	Rhabdoviridae	NA	Lyssavirus	11932	TRUE	FALSE	SS	RNA	enveloped	Kuzmin et al. 2011	Strieker et al. 2010	100	10.3	0.99	254	67.49	73	4	0.789302	1	1	1.24226	1.08869	ssRNA(-)	1	direct_host
Rabies_virus	Nyctalus_noctula	1	1	4	saliva	100	100	1	encephalitis	1	low		wild	Isolation	CHIROPTERA	VESPERTILIONIDAE	Nyctalus	noctula	Mononegavirales	Rhabdoviridae	NA	Lyssavirus	11932	TRUE	FALSE	SS	RNA	enveloped	Kuzmin et al. 2011	Selimov et al. 1991	100	28.48	1.33	144	72.24	613	73	0.975537	3	4	1.24226	1.08869	ssRNA(-)	1	direct_host
Rabies_virus	Canis_lupus	2	0	4	saliva	100	100	1	encephalitis	1	low		wild	PCR	CARNIVORA	CANIDAE	Canis	lupus	Mononegavirales	Rhabdoviridae	NA	Lyssavirus	11932	TRUE	FALSE	SS	RNA	enveloped	Stuchin et al. 2018	Kuzmin et al. 2004	100	31756.5	4.98	354	63.5	3742	345	0.772511	1	3	1.24226	1.08869	ssRNA(-)	1	secondary_only
Rabies_virus	Cynictis_penicillata	1	1	4	saliva	100	100	1	encephalitis	1	low		wild	PCR	CARNIVORA	HERPESTIDAE	Cynictis	penicillata	Mononegavirales	Rhabdoviridae	NA	Lyssavirus	11932	TRUE	FALSE	SS	RNA	enveloped	Kaplan 1969; https://www.cdc.gov/rabies/exposure/animals/wildlife_reservoirs.html	Cissi et al. 1985	100	694.41	2.15	182.4	56.83	77	22	0.650055	1	1	1.24226	1.08869	ssRNA(-)	1	direct_host
Rabies_virus	Cynomops_abrasus	1	1	4	saliva	100	100	1	encephalitis	1	low		wild	Isolation	CHIROPTERA	MOLOSSIDAE	Cynomops	abrasus	Mononegavirales	Rhabdoviridae	NA	Lyssavirus	11932	TRUE	FALSE	SS	RNA	enveloped	Kuzmin et al. 2011	Kobayashi et al. 2010 Note that this species is referred to as Molossus abrasus in this text.	100	35.39	0.98	60	106.86	6	1	0.785839	1	1	1.24226	1.08869	ssRNA(-)	1	direct_host
Rabies_virus	Canis_mesomelas	1	1	4	saliva	100	100	1	encephalitis	1	low		wild	Isolation	CARNIVORA	CANIDAE	Canis	mesomelas	Mononegavirales	Rhabdoviridae	NA	Lyssavirus	11932	TRUE	FALSE	SS	RNA	enveloped	https://www.who-rabies-bulletin.org/site-page/epidemiology-rabies	Zulu et al. 2009	100	8247.3	3.89	168	62.5	200	39	0.734	1	3	1.24226	1.08869	ssRNA(-)	1	direct_host
Rabies_virus	Lasiurus_xanthinus	1	1	4	saliva	100	100	1	encephalitis	1	low		wild	PCR	CHIROPTERA	VESPERTILIONIDAE	Lasiurus	xanthinus	Mononegavirales	Rhabdoviridae	NA	Lyssavirus	11932	TRUE	FALSE	SS	RNA	enveloped	Kuzmin et al. 2011	Blanton et al. 2008	100	16.886	2.574	25.2	79.203	19	2	1.08796	1	1	1.24226	1.08869	ssRNA(-)	1	direct_host
Rabies_virus	Tragelaphus_strepsiceros	2	0	4	saliva	100	100	1	encephalitis	1	low		wild	PCR	CETARTIODACTYLA	BOVIDAE	Tragelaphus	strepsiceros	Mononegavirales	Rhabdoviridae	NA	Lyssavirus	11932	TRUE	FALSE	SS	RNA	enveloped	Stuchin et al. 2018	Mansfield et al. 2006	100	206056	1	276	220.94	247	82	0.692616	1	4	1.24226	1.08869	ssRNA(-)	1	secondary_only
Rabies_virus	Myotis_chiloensis	1	1	4	saliva	100	100	1	encephalitis	1	low		wild	PCR	CHIROPTERA	VESPERTILIONIDAE	Myotis	chiloensis	Mononegavirales	Rhabdoviridae	NA	Lyssavirus	11932	TRUE	FALSE	SS	RNA	enveloped	Kuzmin et al. 2011	de Mattos et al. 2000	100	8.41	0.98	234.37	61.95	24	5	0.896722	1	1	1.24226	1.08869	ssRNA(-)	1	direct_host
Rabies_virus	Otocyon_megalotis	1	1	4	saliva	100	100	1	encephalitis	1	low		wild	PCR	CARNIVORA	CANIDAE	Otocyon	megalotis	Mononegavirales	Rhabdoviridae	NA	Lyssavirus	11932	TRUE	FALSE	SS	RNA	enveloped	https://www.who-rabies-bulletin.org/site-page/epidemiology-rabies	Lembo et al. 2008	100	4098.12	4	165.6	67.54	83	13	0.791713	1	1	1.24226	1.08869	ssRNA(-)	1	direct_host
Rabies_virus	Platyrrhinus_lineatus	1	1	4	saliva	100	100	1	encephalitis	1	low		wild	Isolation	CHIROPTERA	PHYLLOSTOMIDAE	Platyrrhinus	lineatus	Mononegavirales	Rhabdoviridae	NA	Lyssavirus	11932	TRUE	FALSE	SS	RNA	enveloped	Kuzmin et al. 2011	[414]	100	24.34	0.99	122.4	107.97	31	3	0.748763	1	1	1.24226	1.08869	ssRNA(-)	1	direct_host
Rabies_virus	Carollia_perspicillata	1	1	4	saliva	100	100	1	encephalitis	1	low		wild	Isolation	CHIROPTERA	PHYLLOSTOMIDAE	Carollia	perspicillata	Mononegavirales	Rhabdoviridae	NA	Lyssavirus	11932	TRUE	FALSE	SS	RNA	enveloped	Kuzmin et al. 2011	Tomaz et al. 2007	100	19.23	1	148.8	114.6	306	61	0.753167	1	2	1.24226	1.08869	ssRNA(-)	1	direct_host
Rabies_virus	Marmota_monax	2	0	4	saliva	100	100	1	encephalitis	1	low		wild	Isolation	RODENTIA	SCIURIDAE	Marmota	monax	Mononegavirales	Rhabdoviridae	NA	Lyssavirus	11932	TRUE	FALSE	SS	RNA	enveloped	Stuchin et al. 2018	Wang et al. 2009	100	3880.93	4.1	120	31.5	474	143	0.806311	1	3	1.24226	1.08869	ssRNA(-)	1	secondary_only
Rabies_virus	Herpestes_sanguineus	1	1	4	saliva	100	100	1	encephalitis	1	low		wild	PCR	CARNIVORA	HERPESTIDAE	Herpestes	sanguineus	Mononegavirales	Rhabdoviridae	NA	Lyssavirus	11932	TRUE	FALSE	SS	RNA	enveloped	Kaplan 1969; https://www.cdc.gov/rabies/exposure/animals/wildlife_reservoirs.html	van Zyl et al. 2010	100	543.83	2.5	72	61.27	31	5	0.674855	1	1	1.24226	1.08869	ssRNA(-)	1	direct_host
Rabies_virus	Lasiurus_blossevillii	1	1	4	saliva	100	100	1	encephalitis	1	low		wild	PCR	CHIROPTERA	VESPERTILIONIDAE	Lasiurus	blossevillii	Mononegavirales	Rhabdoviridae	NA	Lyssavirus	11932	TRUE	FALSE	SS	RNA	enveloped	Kuzmin et al. 2011	Streiker et al. 2010	100	16.886	2.574	25.2	79.203	19	3	1.07409	1	1	1.24226	1.08869	ssRNA(-)	1	direct_host
Rabies_virus	Felis_silvestris	2	0	4	saliva	100	100	1	encephalitis	1	low		wild	PCR	CARNIVORA	FELIDAE	Felis	silvestris	Mononegavirales	Rhabdoviridae	NA	Lyssavirus	11932	TRUE	FALSE	SS	RNA	enveloped	Stuchin et al. 2018	Lembo et al. 2008	100	4573.08	3.59	336	65.49	650	76	0.670752	1	7	1.24226	1.08869	ssRNA(-)	1	secondary_only
Rabies_virus	Lasiurus_cinereus	1	1	4	saliva	100	100	1	encephalitis	1	low		wild	PCR	CHIROPTERA	VESPERTILIONIDAE	Lasiurus	cinereus	Mononegavirales	Rhabdoviridae	NA	Lyssavirus	11932	TRUE	FALSE	SS	RNA	enveloped	Kuzmin et al. 2011	Blanton et al. 2008	100	27.06	1.96	25.2	57.18	306	31	1.08869	1	1	1.24226	1.08869	ssRNA(-)	1	direct_host
Rabies_virus	Leptonycteris_nivalis	1	1	4	saliva	100	100	1	encephalitis	1	low		wild	Isolation	CHIROPTERA	PHYLLOSTOMIDAE	Leptonycteris	nivalis	Mononegavirales	Rhabdoviridae	NA	Lyssavirus	11932	TRUE	FALSE	SS	RNA	enveloped	Kuzmin et al. 2011	Constantine 1979	100	24.26	1	120	121.66	50	12	0.767685	1	1	1.24226	1.08869	ssRNA(-)	1	direct_host
Rabies_virus	Histiotus_montanus	1	1	4	saliva	100	100	1	encephalitis	1	low		wild	Isolation	CHIROPTERA	VESPERTILIONIDAE	Histiotus	montanus	Mononegavirales	Rhabdoviridae	NA	Lyssavirus	11932	TRUE	FALSE	SS	RNA	enveloped	Kuzmin et al. 2011	Cisterna et al. 2005	100	15.94	1.5	144	52.14	20	5	0.789302	1	1	1.24226	1.08869	ssRNA(-)	1	direct_host
Rabies_virus	Nyctereutes_procyonoides	1	1	4	saliva	100	100	1	encephalitis	1	low		wild	PCR	CARNIVORA	CANIDAE	Nyctereutes	procyonoides	Mononegavirales	Rhabdoviridae	NA	Lyssavirus	11932	TRUE	FALSE	SS	RNA	enveloped	Kaplan 1969; https://www.cdc.gov/rabies/exposure/animals/wildlife_reservoirs.html	Kuzmin et al. 2004	100	4214.99	6.36	168	61.84	599	174	0.757224	3	3	1.24226	1.08869	ssRNA(-)	1	direct_host
Rabies_virus	Eptesicus_fuscus	1	1	4	saliva	100	100	1	encephalitis	1	low		wild	PCR	CHIROPTERA	VESPERTILIONIDAE	Eptesicus	fuscus	Mononegavirales	Rhabdoviridae	NA	Lyssavirus	11932	TRUE	FALSE	SS	RNA	enveloped	Kuzmin et al. 2011	Blanton et al. 2008	100	17.49	1.85	240	52.14	908	116	0.916713	1	1	1.24226	1.08869	ssRNA(-)	1	direct_host
Rabies_virus	Myotis_velifer	1	1	4	saliva	100	100	1	encephalitis	1	low		wild	PCR	CHIROPTERA	VESPERTILIONIDAE	Myotis	velifer	Mononegavirales	Rhabdoviridae	NA	Lyssavirus	11932	TRUE	FALSE	SS	RNA	enveloped	Kuzmin et al. 2011	Blanton et al. 2008	100	9.82	0.99	135.96	63.77	113	19	0.878634	1	1	1.24226	1.08869	ssRNA(-)	1	direct_host
Rabies_virus	Eumops_glaucinus	1	1	4	saliva	100	100	1	encephalitis	1	low		wild	Isolation	CHIROPTERA	MOLOSSIDAE	Eumops	glaucinus	Mononegavirales	Rhabdoviridae	NA	Lyssavirus	11932	TRUE	FALSE	SS	RNA	enveloped	Kuzmin et al. 2011	Cunha et al. 2006	100	36.2	1.04	144	85	37	2	0.759274	1	1	1.24226	1.08869	ssRNA(-)	1	direct_host
Rabies_virus	Myotis_yumanensis	1	1	4	saliva	100	100	1	encephalitis	1	low		wild	PCR	CHIROPTERA	VESPERTILIONIDAE	Myotis	yumanensis	Mononegavirales	Rhabdoviridae	NA	Lyssavirus	11932	TRUE	FALSE	SS	RNA	enveloped	Kuzmin et al. 2011	Blanton et al. 2008	100	5.15	0.99	105.96	61.95	87	11	0.888437	1	1	1.24226	1.08869	ssRNA(-)	1	direct_host
Rabies_virus	Canis_adustus	1	1	4	saliva	100	100	1	encephalitis	1	low		wild	Isolation	CARNIVORA	CANIDAE	Canis	adustus	Mononegavirales	Rhabdoviridae	NA	Lyssavirus	11932	TRUE	FALSE	SS	RNA	enveloped	https://www.who-rabies-bulletin.org/site-page/epidemiology-rabies	Sebeta et al. 2003	100	10392.5	4.5	137	65	72	26	0.794854	1	1	1.24226	1.08869	ssRNA(-)	1	direct_host
Rabies_virus	Crocuta_crocuta	2	0	4	saliva	100	100	1	encephalitis	1	low		wild	PCR	CARNIVORA	HYAENIDAE	Crocuta	crocuta	Mononegavirales	Rhabdoviridae	NA	Lyssavirus	11932	TRUE	FALSE	SS	RNA	enveloped	Sabeta et al. 2018	Lembo et al. 2008	100	63370	1.91	493.2	112.33	803	64	0.647616	1	4	1.24226	1.08869	ssRNA(-)	1	secondary_only
Rabies_virus	Molossus_molossus	1	1	4	saliva	100	100	1	encephalitis	1	low		wild	Isolation	CHIROPTERA	MOLOSSIDAE	Molossus	molossus	Mononegavirales	Rhabdoviridae	NA	Lyssavirus	11932	TRUE	FALSE	SS	RNA	enveloped	Kuzmin et al. 2011	Kobayashi et al. 2007; Paez et al. 2003	100	13.7	0.99	67.1999	107.97	185	46	0.753197	1	1	1.24226	1.08869	ssRNA(-)	1	direct_host
Rabies_virus	Lasiurus_intermedius	1	1	4	saliva	100	100	1	encephalitis	1	low		wild	Isolation	CHIROPTERA	VESPERTILIONIDAE	Lasiurus	intermedius	Mononegavirales	Rhabdoviridae	NA	Lyssavirus	11932	TRUE	FALSE	SS	RNA	enveloped	Kuzmin et al. 2011	Nadin-Davis et al. 2001	100	22.96	2.97	25.2	79.203	36	3	1.07409	1	1	1.24226	1.08869	ssRNA(-)	1	direct_host
Rabies_virus	Rangifer_tarandus	2	0	4	saliva	100	100	1	encephalitis	1	low		wild	PCR	CETARTIODACTYLA	CERVIDAE	Rangifer	tarandus	Mononegavirales	Rhabdoviridae	NA	Lyssavirus	11932	TRUE	FALSE	SS	RNA	enveloped	Stuchin et al. 2018	Kuzmin et al. 2004	100	109088	2	242.4	222.5	3545	561	0.748149	2	6	1.24226	1.08869	ssRNA(-)	1	secondary_only
Rabies_virus	Eumops_perotis	1	1	4	saliva	100	100	1	encephalitis	1	low		wild	PCR	CHIROPTERA	MOLOSSIDAE	Eumops	perotis	Mononegavirales	Rhabdoviridae	NA	Lyssavirus	11932	TRUE	FALSE	SS	RNA	enveloped	Kuzmin et al. 2011	Castilho et al. 2008	100	50.97	0.99	144	85	57	8	0.753054	1	1	1.24226	1.08869	ssRNA(-)	1	direct_host
Rabies_virus	Mellivora_capensis	2	0	4	saliva	100	100	1	encephalitis	1	low		wild	Isolation	CARNIVORA	MUSTELIDAE	Mellivora	capensis	Mononegavirales	Rhabdoviridae	NA	Lyssavirus	11932	TRUE	FALSE	SS	RNA	enveloped	Stuchin et al. 2018	Bingham et al. 2001	100	8999.99	2.35	318	181.46	102	9	0.691051	1	1	1.24226	1.08869	ssRNA(-)	1	secondary_only
Rabies_virus	Tadarida_brasiliensis	1	1	4	saliva	100	100	1	encephalitis	1	low		wild	PCR	CHIROPTERA	MOLOSSIDAE	Tadarida	brasiliensis	Mononegavirales	Rhabdoviridae	NA	Lyssavirus	11932	TRUE	FALSE	SS	RNA	enveloped	Kuzmin et al. 2011	Blanton et al. 2008	100	12.61	1.11	180	89.99	437	79	0.709113	1	1	1.24226	1.08869	ssRNA(-)	1	direct_host
Rabies_virus	Myotis_lucifugus	1	1	4	saliva	100	100	1	encephalitis	1	low		wild	PCR	CHIROPTERA	VESPERTILIONIDAE	Myotis	lucifugus	Mononegavirales	Rhabdoviridae	NA	Lyssavirus	11932	TRUE	FALSE	SS	RNA	enveloped	Kuzmin et al. 2011	Blanton et al. 2008	100	7.8	1	408	59.79	853	75	0.877793	1	1	1.24226	1.08869	ssRNA(-)	1	direct_host
Rabies_virus	Procyon_lotor	1	1	4	saliva	100	100	1	encephalitis	1	low		wild	PCR	CARNIVORA	PROCYONIDAE	Procyon	lotor	Mononegavirales	Rhabdoviridae	NA	Lyssavirus	11932	TRUE	FALSE	SS	RNA	enveloped	Kaplan 1969; https://www.cdc.gov/rabies/exposure/animals/wildlife_reservoirs.html	Nadin-Davies et al. 1994	100	6373.72	3.06	252	65	1699	655	0.753361	4	5	1.24226	1.08869	ssRNA(-)	1	direct_host
Rabies_virus	Pteropus_poliocephalus	1	1	4	saliva	100	100	1	encephalitis	1	low		wild	Isolation	CHIROPTERA	PTEROPODIDAE	Pteropus	poliocephalus	Mononegavirales	Rhabdoviridae	NA	Lyssavirus	11932	TRUE	FALSE	SS	RNA	enveloped	Kuzmin et al. 2011	Pal et al. 1980	100	702.78	1	180	187.72	184	26	0.65216	4	5	1.24226	1.08869	ssRNA(-)	1	direct_host
Rabies_virus	Panthera_pardus	2	0	4	saliva	100	100	1	encephalitis	1	low		wild	PCR	CARNIVORA	FELIDAE	Panthera	pardus	Mononegavirales	Rhabdoviridae	NA	Lyssavirus	11932	TRUE	FALSE	SS	RNA	enveloped	Kaplan 1969	Lembo et al. 2008	100	52400	2.14	276	96.74	1067	138	0.712128	1	2	1.24226	1.08869	ssRNA(-)	1	secondary_only
Rabies_virus	Alopex_lagopus	1	1	4	saliva	100	100	1	encephalitis	1	low		wild	PCR	CARNIVORA	CANIDAE	Alopex	lagopus	Mononegavirales	Rhabdoviridae	NA	Lyssavirus	11932	TRUE	FALSE	SS	RNA	enveloped	https://www.who-rabies-bulletin.org/site-page/epidemiology-rabies	Kuzmin et al. 2004	100	3584.37	7.65	180	52.99	1157	215	0.747948	1	1	1.24226	1.08869	ssRNA(-)	1	direct_host
Rabies_virus	Myotis_leibii	1	1	4	saliva	100	100	1	encephalitis	1	low		wild	Isolation	CHIROPTERA	VESPERTILIONIDAE	Myotis	leibii	Mononegavirales	Rhabdoviridae	NA	Lyssavirus	11932	TRUE	FALSE	SS	RNA	enveloped	Kuzmin et al. 2011	Constantine 1979	100	5.22	0.99	144	61.95	74	4	0.857422	1	1	1.24226	1.08869	ssRNA(-)	1	direct_host
Rabies_virus	Myotis_keenii	1	1	4	saliva	100	100	1	encephalitis	1	low		wild	Isolation	CHIROPTERA	VESPERTILIONIDAE	Myotis	keenii	Mononegavirales	Rhabdoviridae	NA	Lyssavirus	11932	TRUE	FALSE	SS	RNA	enveloped	Kuzmin et al. 2011	Main 1979	100	6.51	0.99	222	60	56	8	0.86156	1	1	1.24226	1.08869	ssRNA(-)	1	direct_host
Rabies_virus	Spermophilus_undulatus	2	0	4	saliva	100	100	1	encephalitis	1	low		wild	PCR	RODENTIA	SCIURIDAE	Spermophilus	undulatus	Mononegavirales	Rhabdoviridae	NA	Lyssavirus	11932	TRUE	FALSE	SS	RNA	enveloped	Stuchin et al. 2018	Kuzmin et al. 2004	100	742.91	7.77	60	25.33	189	28	0.803128	1	1	1.24226	1.08869	ssRNA(-)	1	secondary_only
Rabies_virus	Euderma_maculatum	1	1	4	saliva	100	100	1	encephalitis	1	low		wild	Isolation	CHIROPTERA	VESPERTILIONIDAE	Euderma	maculatum	Mononegavirales	Rhabdoviridae	NA	Lyssavirus	11932	TRUE	FALSE	SS	RNA	enveloped	Kuzmin et al. 2011	Nadin-Davis et al. 2001	100	16.17	1	154	54.14	72	7	0.976853	1	1	1.24226	1.08869	ssRNA(-)	1	direct_host
Rabies_virus	Suricata_suricatta	1	1	4	saliva	100	100	1	encephalitis	1	low		wild	PCR	CARNIVORA	HERPESTIDAE	Suricata	suricatta	Mononegavirales	Rhabdoviridae	NA	Lyssavirus	11932	TRUE	FALSE	SS	RNA	enveloped	Stuchin et al. 2018	van Zyl et al. 2010	100	729.99	3.86	150	77	172	15	0.677073	1	1	1.24226	1.08869	ssRNA(-)	1	direct_host
Rabies_virus	Canis_lupus	1	1	4	saliva	100	100	1	encephalitis	1	low		domestic	PCR	CARNIVORA	CANIDAE	Canis	familiaris	Mononegavirales	Rhabdoviridae	NA	Lyssavirus	11932	TRUE	FALSE	SS	RNA	enveloped	https://www.who-rabies-bulletin.org/site-page/epidemiology-rabies	Lembo et al. 2008	100	31756.5	4.98	354	63.5	3742	345	0.772511	1	3	1.24226	1.08869	ssRNA(-)	1	direct_host
Rabies_virus	Pipistrellus_hesperus	1	1	4	saliva	100	100	1	encephalitis	1	low		wild	PCR	CHIROPTERA	VESPERTILIONIDAE	Pipistrellus	hesperus	Mononegavirales	Rhabdoviridae	NA	Lyssavirus	11932	TRUE	FALSE	SS	RNA	enveloped	Kuzmin et al. 2011	Blanton et al. 2008	100	3.56	1.86	72.99	40	69	10	0.91626	1	1	1.24226	1.08869	ssRNA(-)	1	direct_host
Rabies_virus	Lasiurus_seminolus	1	1	4	saliva	100	100	1	encephalitis	1	low		wild	PCR	CHIROPTERA	VESPERTILIONIDAE	Lasiurus	seminolus	Mononegavirales	Rhabdoviridae	NA	Lyssavirus	11932	TRUE	FALSE	SS	RNA	enveloped	Kuzmin et al. 2011	Strieker et al. 2010; Constantine 1979	100	9.88	2.68	25.2	79.203	62	0	1.07409	1	1	1.24226	1.08869	ssRNA(-)	1	direct_host
Rabies_virus	Genetta_genetta	2	0	4	saliva	100	100	1	encephalitis	1	low		wild	PCR	CARNIVORA	VIVERRIDAE	Genetta	genetta	Mononegavirales	Rhabdoviridae	NA	Lyssavirus	11932	TRUE	FALSE	SS	RNA	enveloped	Stuchin et al. 2018	Lembo et al. 2008	100	1756.17	2.29	408	74.18	250	44	0.695267	1	1	1.24226	1.08869	ssRNA(-)	1	secondary_only
Rabies_virus	Lasiurus_borealis	1	1	4	saliva	100	100	1	encephalitis	1	low		wild	PCR	CHIROPTERA	VESPERTILIONIDAE	Lasiurus	borealis	Mononegavirales	Rhabdoviridae	NA	Lyssavirus	11932	TRUE	FALSE	SS	RNA	enveloped	Kuzmin et al. 2011	Blanton et al. 2008	100	12.33	3.12	25.2	84.21	298	30	1.07409	1	1	1.24226	1.08869	ssRNA(-)	1	direct_host
Rabies_virus	Lasiurus_ega	1	1	4	saliva	100	100	1	encephalitis	1	low		wild	PCR	CHIROPTERA	VESPERTILIONIDAE	Lasiurus	ega	Mononegavirales	Rhabdoviridae	NA	Lyssavirus	11932	TRUE	FALSE	SS	RNA	enveloped	Kuzmin et al. 2011	Blanton et al. 2008	100	12.2	2.14	25.2	96.22	46	9	1.04562	1	1	1.24226	1.08869	ssRNA(-)	1	direct_host
Reston_ebolavirus	Macaca_fascicularis	1	0	4	bodily fluids	0	0	1	asymptomatic	1	low		wild	Isolation	PRIMATES	CERCOPITHECIDAE	Macaca	fascicularis	Mononegavirales	Filoviridae	NA	Ebolavirus	18865.5	TRUE	FALSE	SS	RNA	enveloped	Morikawa et al. 2007; Barrette et al. 2009	Miranda et al. 1991	0	4569.32	1	456	164.69	1084	190	0.405899	4	11	0.777781	0.715977	ssRNA(-)	1	reservoir_only
Reston_ebolavirus	Miniopterus_schreibersii	1	0	1	bodily fluids	0	0	1	asymptomatic	1	low		wild	PCR	CHIROPTERA	MINIOPTERIDAE	Miniopterus	schreibersii	Mononegavirales	Filoviridae	NA	Ebolavirus	18865.5	TRUE	FALSE	SS	RNA	enveloped	Morikawa et al. 2007; Barrette et al. 2009	Jayme et al. 2015	0	11.46	0.99	168	182.5	279	47	0.783355	3	4	0.777781	0.715977	ssRNA(-)	1	reservoir_only
Reston_ebolavirus	Sus_scrofa	2	1	4	bodily fluids	0	0	1	asymptomatic	1	low		domestic	Isolation	CETARTIODACTYLA	SUIDAE	Sus	scrofa	Mononegavirales	Filoviridae	NA	Ebolavirus	18865.5	TRUE	FALSE	SS	RNA	enveloped	Morikawa et al. 2007; Barrette et al. 2009	Barrette et al. 2009	0	84471.5	4.52	252	115.2	3932	1671	0.67177	13	41	0.777781	0.715977	ssRNA(-)	1	int_host
Rio_Mamore_virus	Oligoryzomys_microtis	1	1	1	aerosolized excreta	50	50	1	hantavirus cardiopulmonary syndrome (HCPS)	1	high	Only 4 human cases have been reported/confirmed - 2 were fatal (human cases first discovered in 2012). Proxied recombination rate with Andes virus, another cause of HPS	wild	Isolation	RODENTIA	CRICETIDAE	Oligoryzomys	microtis	Bunyavirales	Hantaviridae	NA	Orthohantavirus	12183	TRUE	TRUE	SS	RNA	enveloped	Casapia et al. 2012; Oliveira et al. 2014	Bharadwaj et al. 1997	50	22.5	4.2375	21.5	20.59	19	8	0.82006	2	2	0.299303	0.830221	ssRNA(-)	1	direct_host
Rotavirus_A	Equus_caballus	1	0	2	fecal - oral	0.255	0.4	1	common cold	4	high	Rota A circulates in lots of hosts but clear transmission (in both directions) appears only to occur from pigs. Note that CFR is taken from a general review paper and does not distinguish among rotavirus types, though this is under 5 CFR so likey for rota A	domestic	PCR	PERISSODACTYLA	EQUIDAE	Equus	caballus	Unassigned	Reoviridae	Sedoreovirinae	Rotavirus	18562	TRUE	TRUE	DS	RNA	non-enveloped	Geoghegan et al. 2018	Banyai e al 2009	0.3275	403599	1	744	338.97	2067	771	0.636988	5	23	0.762904	0.757224	dsRNA	1	reservoir_only
Rotavirus_A	Bos_taurus	1	0	2	fecal - oral	0.255	0.4	1	common cold	4	high	Rota A circulates in lots of hosts but clear transmission (in both directions) appears only to occur from pigs. Note that CFR is taken from a general review paper and does not distinguish among rotavirus types, though this is under 5 CFR so likey for rota A	domestic	PCR	CETARTIODACTYLA	BOVIDAE	Bos	taurus	Unassigned	Reoviridae	Sedoreovirinae	Rotavirus	18562	TRUE	TRUE	DS	RNA	non-enveloped	Geoghegan et al. 2018	Banyai e al 2009	0.3275	618642	1	240	280.48	4238	2742	0.682652	11	46	0.762904	0.757224	dsRNA	1	reservoir_only
Rotavirus_A	Sus_scrofa	1	1	2	fecal - oral	0.255	0.4	1	common cold	4	high	Rota A circulates in lots of hosts but clear transmission (in both directions) appears only to occur from pigs. Note that CFR is taken from a general review paper and does not distinguish among rotavirus types, though this is under 5 CFR so likey for rota A	wild	PCR	CETARTIODACTYLA	SUIDAE	Sus	scrofa	Unassigned	Reoviridae	Sedoreovirinae	Rotavirus	18562	TRUE	TRUE	DS	RNA	non-enveloped	Geoghegan et al. 2018	Okadera et al. 2013	0.3275	84471.5	4.52	252	115.2	3932	1671	0.67177	13	41	0.762904	0.757224	dsRNA	1	direct_host
Rotavirus_A	Felis_catus	1	0	2	fecal - oral	0.255	0.4	1	common cold	4	high	Rota A circulates in lots of hosts but clear transmission (in both directions) appears only to occur from pigs. Note that CFR is taken from a general review paper and does not distinguish among rotavirus types, though this is under 5 CFR so likey for rota A	domestic	PCR	CARNIVORA	FELIDAE	Felis	catus	Unassigned	Reoviridae	Sedoreovirinae	Rotavirus	18562	TRUE	TRUE	DS	RNA	non-enveloped	Geoghegan et al. 2018	Banyai e al 2009	0.3275	2884.8	2.685	408	62.99	2495	1016	0.669865	4	14	0.762904	0.757224	dsRNA	1	reservoir_only
Rotavirus_A	Oryctolagus_cuniculus	1	0	2	fecal - oral	0.255	0.4	1	common cold	4	high	Rota A circulates in lots of hosts but clear transmission (in both directions) appears only to occur from pigs. Note that CFR is taken from a general review paper and does not distinguish among rotavirus types, though this is under 5 CFR so likey for rota A	domestic	PCR	LAGOMORPHA	LEPORIDAE	Oryctolagus	cuniculus	Unassigned	Reoviridae	Sedoreovirinae	Rotavirus	18562	TRUE	TRUE	DS	RNA	non-enveloped	Geoghegan et al. 2018; isolated rabbit in Castrucci 1995	Banyai e al 2009	0.3275	1590.57	5.24	216	30.45	3257	1259	0.722904	1	7	0.762904	0.757224	dsRNA	1	reservoir_only
Rotavirus_A	Sus_scrofa	1	1	2	fecal - oral	0.255	0.4	1	common cold	4	high	Rota A circulates in lots of hosts but clear transmission (in both directions) appears only to occur from pigs. Note that CFR is taken from a general review paper and does not distinguish among rotavirus types, though this is under 5 CFR so likey for rota A	domestic	PCR	CETARTIODACTYLA	SUIDAE	Sus	scrofa	Unassigned	Reoviridae	Sedoreovirinae	Rotavirus	18562	TRUE	TRUE	DS	RNA	non-enveloped	Geoghegan et al. 2018	Okadera et al. 2013	0.3275	84471.5	4.52	252	115.2	3932	1671	0.67177	13	41	0.762904	0.757224	dsRNA	1	direct_host
Rotavirus_B	Sus_scrofa	1	1	2	fecal - oral	0.255	0.4	1	common cold but usually porcine in origin	4	high	Rota A circulates in lots of hosts but clear transmission (in both directions) appears only to occur from pigs. Note that CFR is taken from a general review paper and does not distinguish among rotavirus types, though this is under 5 CFR so likey for rota A	domestic	PCR	CETARTIODACTYLA	SUIDAE	Sus	scrofa	Unassigned	Reoviridae	Sedoreovirinae	Rotavirus	18750	TRUE	TRUE	DS	RNA	non-enveloped	Geoghegan et al. 2018	Medici et al. 2010	0.3275	84471.5	4.52	252	115.2	3932	1671	0.67177	13	41	0.430543	0.745671	dsRNA	1	direct_host
Rotavirus_C	Bos_taurus	1	0	2	fecal - oral	0.255	0.4	1	common cold but usually porcine in origin	4	high	Rota A circulates in lots of hosts but clear transmission (in both directions) appears only to occur from pigs. Note that CFR is taken from a general review paper and does not distinguish among rotavirus types, though this is under 5 CFR so likey for rota A	domestic	Isolation	CETARTIODACTYLA	BOVIDAE	Bos	taurus	Unassigned	Reoviridae	Sedoreovirinae	Rotavirus	17910	TRUE	TRUE	DS	RNA	non-enveloped	Geoghegan et al. 2018	Tsunemitsu et al. 1991	0.3275	618642	1	240	280.48	4238	2742	0.682652	11	46	0.367525	0.682652	dsRNA	1	reservoir_only
Rotavirus_C	Sus_scrofa	1	1	2	fecal - oral	0.255	0.4	1	common cold but usually porcine in origin	4	high	Rota A circulates in lots of hosts but clear transmission (in both directions) appears only to occur from pigs. Note that CFR is taken from a general review paper and does not distinguish among rotavirus types, though this is under 5 CFR so likey for rota A	domestic	PCR	CETARTIODACTYLA	SUIDAE	Sus	scrofa	Unassigned	Reoviridae	Sedoreovirinae	Rotavirus	17910	TRUE	TRUE	DS	RNA	non-enveloped	Geoghegan et al. 2018	Medici et al. 2010	0.3275	84471.5	4.52	252	115.2	3932	1671	0.67177	13	41	0.367525	0.682652	dsRNA	1	direct_host
Sealpox_virus	Phoca_vitulina	1	1	3	contact with lesions	0	0	1	lesions	1	high	Recombination rate proxied with other poxviruses	wild	PCR	CARNIVORA	PHOCIDAE	Phoca	vitulina	Group_I	Poxviridae	Chordopoxvirinae	Parapoxvirus	140000	TRUE	FALSE	DS	DNA	enveloped	Clark et al. 2005; Roess et al. 2011	Becher et al. 2002	0	87316.7	1	480	288.95	2123	422	0.665017	1	5	0	0.665017	dsDNA	1	direct_host
Sealpox_virus	Halichoerus_grypus	1	1	3	contact with lesions	0	0	1	lesions	1	high	Recombination rate proxied with other poxviruses	wild	PCR	CARNIVORA	PHOCIDAE	Halichoerus	grypus	Group_I	Poxviridae	Chordopoxvirinae	Parapoxvirus	140000	TRUE	FALSE	DS	DNA	enveloped	Clark et al. 2005; Roess et al. 2011	Roess et al. 2011	0	197570	0.96	560.07	349.79	1469	194	0.660375	0	1	0	0.665017	dsDNA	1	direct_host
Seoul_virus	Rattus_tanezumi	1	1	1	aerosolized excreta, or saliva (via bite)	1	2	1	hemorrhagic fever with renal syndrom (HFRS)	1	high	less severe than Hantaan virus	wild	PCR	RODENTIA	MURIDAE	Rattus	tanezumi	Bunyavirales	Hantaviridae	NA	Orthohantavirus	11950	TRUE	TRUE	SS	RNA	enveloped	https://www.cdc.gov/mmwr/volumes/67/wr/mm6704a5.htm; https://www.who.int/csr/don/20-february-2017-seoulvirus-usa-and-canada/en/; Geoijenbier et al. 2015; Lee et al. 1982. Isolation of hantaan virus, the etiologic agent of Korean Hemorrhagic Fever, from wild urban rats; Park et al.1989. A clinical study of hemorrhagic fever with renal syndrome caused by Seoul Virus infection; https://www.ncbi.nlm.…	Johansson P. et al. 2010	1.5	140.84	7.435	50.4	22.595	74	29	0.674932	1	1	0.464917	0.707627	ssRNA(-)	1	direct_host
Seoul_virus	Rattus_losea	1	1	1	aerosolized excreta, or saliva (via bite)	1	2	1	hemorrhagic fever with renal syndrom (HFRS)	1	high	less severe than Hantaan virus	wild	Isolation	RODENTIA	MURIDAE	Rattus	losea	Bunyavirales	Hantaviridae	NA	Orthohantavirus	11950	TRUE	TRUE	SS	RNA	enveloped	https://www.cdc.gov/mmwr/volumes/67/wr/mm6704a5.htm; https://www.who.int/csr/don/20-february-2017-seoulvirus-usa-and-canada/en/; Geoijenbier et al. 2015; Lee et al. 1982. Isolation of hantaan virus, the etiologic agent of Korean Hemorrhagic Fever, from wild urban rats; Park et al.1989. A clinical study of hemorrhagic fever with renal syndrome caused by Seoul Virus infection; https://www.ncbi.nlm.…	Wang et al. 2000	1.5	104.63	7.435	50.4	22.595	96	51	0.658438	1	1	0.464917	0.707627	ssRNA(-)	1	direct_host
Seoul_virus	Microtus_fortis	1	1	1	aerosolized excreta, or saliva (via bite)	1	2	1	hemorrhagic fever with renal syndrom (HFRS)	1	high	less severe than Hantaan virus	wild	PCR	RODENTIA	CRICETIDAE	Microtus	fortis	Bunyavirales	Hantaviridae	NA	Orthohantavirus	11950	TRUE	TRUE	SS	RNA	enveloped	https://www.cdc.gov/mmwr/volumes/67/wr/mm6704a5.htm; https://www.who.int/csr/don/20-february-2017-seoulvirus-usa-and-canada/en/; Geoijenbier et al. 2015; Lee et al. 1982. Isolation of hantaan virus, the etiologic agent of Korean Hemorrhagic Fever, from wild urban rats; Park et al.1989. A clinical study of hemorrhagic fever with renal syndrome caused by Seoul Virus infection; https://www.ncbi.nlm.…	Weng et al. 2008	1.5	63	5.34	32.4	21.0575	155	61	0.707627	1	2	0.464917	0.707627	ssRNA(-)	1	direct_host
Seoul_virus	Rattus_norvegicus	1	1	1	aerosolized excreta, or saliva (via bite)	1	2	1	hemorrhagic fever with renal syndrom (HFRS)	1	high	less severe than Hantaan virus	wild	Isolation	RODENTIA	MURIDAE	Rattus	norvegicus	Bunyavirales	Hantaviridae	NA	Orthohantavirus	11950	TRUE	TRUE	SS	RNA	enveloped	https://www.cdc.gov/mmwr/volumes/67/wr/mm6704a5.htm; https://www.who.int/csr/don/20-february-2017-seoulvirus-usa-and-canada/en/; Geoijenbier et al. 2015; Lee et al. 1982. Isolation of hantaan virus, the etiologic agent of Korean Hemorrhagic Fever, from wild urban rats; Park et al.1989. A clinical study of hemorrhagic fever with renal syndrome caused by Seoul Virus infection; https://www.ncbi.nlm.…	Wang et al. 2000	1.5	282.89	8.99	50.4	21.74	3365	1198	0.662617	6	15	0.464917	0.707627	ssRNA(-)	1	direct_host
Seoul_virus	Rattus_rattus	1	1	1	aerosolized excreta, or saliva (via bite)	1	2	1	hemorrhagic fever with renal syndrom (HFRS)	1	high	less severe than Hantaan virus	domestic	Isolation	RODENTIA	MURIDAE	Rattus	rattus	Bunyavirales	Hantaviridae	NA	Orthohantavirus	11950	TRUE	TRUE	SS	RNA	enveloped	https://www.cdc.gov/mmwr/volumes/67/wr/mm6704a5.htm; https://www.who.int/csr/don/20-february-2017-seoulvirus-usa-and-canada/en/; Geoijenbier et al. 2015; Lee et al. 1982. Isolation of hantaan virus, the etiologic agent of Korean Hemorrhagic Fever, from wild urban rats; Park et al.1989. A clinical study of hemorrhagic fever with renal syndrome caused by Seoul Virus infection; https://www.ncbi.nlm.…	Wang et al. 2000	1.5	142.68	5.88	50.4	23.45	3004	1193	0.664981	5	11	0.464917	0.707627	ssRNA(-)	1	direct_host
Severe_acute_respiratory_syndrome-related_coronavirus	Rhinolophus_pearsonii	1	0	1	respiratory, direct contact	9.5	9.5	1	respiratory illness	1	high		wild	Isolation	CHIROPTERA	RHINOLOPHIDAE	Rhinolophus	pearsonii	Nidovirales	Coronaviridae	Coronavirinae	Betacoronavirus	29751	TRUE	FALSE	SS	RNA	enveloped	Al-Tawfiq et al. 2014	Calisher et al. 2006	9.5	11.55	0.9867	360	91.673	9	3	0.683592	1	1	0.596008	0.757224	ssRNA(+)	1	reservoir_only
Severe_acute_respiratory_syndrome-related_coronavirus	Rhinolophus_macrotis	1	0	1	respiratory, direct contact	9.5	9.5	1	respiratory illness	1	high		wild	Isolation	CHIROPTERA	RHINOLOPHIDAE	Rhinolophus	macrotis	Nidovirales	Coronaviridae	Coronavirinae	Betacoronavirus	29751	TRUE	FALSE	SS	RNA	enveloped	Al-Tawfiq et al. 2014	Calisher et al. 2006	9.5	6.18	0.98	360	91.673	35	6	0.675644	1	1	0.596008	0.757224	ssRNA(+)	1	reservoir_only
Severe_acute_respiratory_syndrome-related_coronavirus	Rhinolophus_ferrumequinum	1	0	1	respiratory, direct contact	9.5	9.5	1	respiratory illness	1	high		wild	Isolation	CHIROPTERA	RHINOLOPHIDAE	Rhinolophus	ferrumequinum	Nidovirales	Coronaviridae	Coronavirinae	Betacoronavirus	29751	TRUE	FALSE	SS	RNA	enveloped	Al-Tawfiq et al. 2014	Calisher et al. 2006	9.5	22.59	0.98	360	91.24	782	121	0.678446	6	6	0.596008	0.757224	ssRNA(+)	1	reservoir_only
Severe_acute_respiratory_syndrome-related_coronavirus	Rhinolophus_blasii	1	0	1	respiratory, direct contact	9.5	9.5	1	respiratory illness	1	high		wild	PCR	CHIROPTERA	RHINOLOPHIDAE	Rhinolophus	blasii	Nidovirales	Coronaviridae	Coronavirinae	Betacoronavirus	29751	TRUE	FALSE	SS	RNA	enveloped	Al-Tawfiq et al. 2014	Drexler et al. 2010	9.5	10.29	0.9867	360	91.24	73	8	0.682421	1	1	0.596008	0.757224	ssRNA(+)	1	reservoir_only
Severe_acute_respiratory_syndrome-related_coronavirus	Rhinolophus_mehelyi	1	0	1	respiratory, direct contact	9.5	9.5	1	respiratory illness	1	high		wild	PCR	CHIROPTERA	RHINOLOPHIDAE	Rhinolophus	mehelyi	Nidovirales	Coronaviridae	Coronavirinae	Betacoronavirus	29751	TRUE	FALSE	SS	RNA	enveloped	Al-Tawfiq et al. 2014	Drexler et al. 2010	9.5	14.03	0.9867	360	91.673	115	12	0.676829	1	1	0.596008	0.757224	ssRNA(+)	1	reservoir_only
Severe_acute_respiratory_syndrome-related_coronavirus	Nyctereutes_procyonoides	2	1	3	respiratory, direct contact	9.5	9.5	1	respiratory illness	1	high		wild	PCR	CARNIVORA	CANIDAE	Nyctereutes	procyonoides	Nidovirales	Coronaviridae	Coronavirinae	Betacoronavirus	29751	TRUE	FALSE	SS	RNA	enveloped	Al-Tawfiq et al. 2014; Wu et al. 2005	Guan et al. 2003	9.5	4214.99	6.36	168	61.84	599	174	0.757224	3	3	0.596008	0.757224	ssRNA(+)	1	int_host
Severe_acute_respiratory_syndrome-related_coronavirus	Paguma_larvata	2	1	3	respiratory, direct contact	9.5	9.5	1	respiratory illness	1	high		wild	PCR	CARNIVORA	VIVERRIDAE	Paguma	larvata	Nidovirales	Coronaviridae	Coronavirinae	Betacoronavirus	29751	TRUE	FALSE	SS	RNA	enveloped	Al-Tawfiq et al. 2014; Wu et al. 2005	Guan et al. 2003	9.5	4300	2.16	216	61.27	127	41	0.686422	2	2	0.596008	0.757224	ssRNA(+)	1	int_host
Severe_acute_respiratory_syndrome-related_coronavirus	Rhinolophus_sinicus	1	0	1	respiratory, direct contact	9.5	9.5	1	respiratory illness	1	high		wild	Isolation	CHIROPTERA	RHINOLOPHIDAE	Rhinolophus	sinicus	Nidovirales	Coronaviridae	Coronavirinae	Betacoronavirus	29751	TRUE	FALSE	SS	RNA	enveloped	Al-Tawfiq et al. 2014	Calisher et al. 2006	9.5	11.25	0.9867	360	91.673	25	4	0.668767	2	2	0.596008	0.757224	ssRNA(+)	1	reservoir_only
Severe_acute_respiratory_syndrome-related_coronavirus	Rhinolophus_euryale	1	0	1	respiratory, direct contact	9.5	9.5	1	respiratory illness	1	high		wild	PCR	CHIROPTERA	RHINOLOPHIDAE	Rhinolophus	euryale	Nidovirales	Coronaviridae	Coronavirinae	Betacoronavirus	29751	TRUE	FALSE	SS	RNA	enveloped	Al-Tawfiq et al. 2014	Drexler et al. 2010	9.5	9.25	1	360	92.54	176	11	0.676825	1	1	0.596008	0.757224	ssRNA(+)	1	reservoir_only
Simian_foamy_virus	Macaca_fascicularis	1	1	1	saliva, blood	0	0	2	asymptomatic	1	high	Not pathogenic - no evidence of disease in nonhuman primate hosts or humans	wild	PCR	PRIMATES	CERCOPITHECIDAE	Macaca	fascicularis	Group_VI	Retroviridae	Spumaretrovirinae	Spumavirus	13246	FALSE	FALSE	SS	RNA	enveloped	Mouinga-Ondeme and Kazanji 2013; Calattini et al. 2034	Webb et al. 1965	0	4569.32	1	456	164.69	1084	190	0.405899	4	11	0.899616	0.786835	ssRNA-RT	1	direct_host
Simian_foamy_virus	Pan_troglodytes	1	1	1	saliva, blood	0	0	2	asymptomatic	1	high	Not pathogenic - no evidence of disease in nonhuman primate hosts or humans	wild	PCR	PRIMATES	HOMINIDAE	Pan	troglodytes	Group_VI	Retroviridae	Spumaretrovirinae	Spumavirus	13246	FALSE	FALSE	SS	RNA	enveloped	Mouinga-Ondeme and Kazanji 2013; Calattini et al. 2007	Hussain et al. 2003	0	45000	1.05	720	231.49	3960	505	0.130389	10	20	0.899616	0.786835	ssRNA-RT	1	direct_host
Simian_foamy_virus	Trachypithecus_francoisi	1	1	1	saliva, blood	0	0	2	asymptomatic	1	high	Not pathogenic - no evidence of disease in nonhuman primate hosts or humans	wild	Isolation	PRIMATES	CERCOPITHECIDAE	Trachypithecus	francoisi	Group_VI	Retroviridae	Spumaretrovirinae	Spumavirus	13246	FALSE	FALSE	SS	RNA	enveloped	Mouinga-Ondeme and Kazanji 2013; Calattini et al. 2019	Hussain et al. 2003	0	8139.93	1	315.6	197.709	63	4	0.417305	1	1	0.899616	0.786835	ssRNA-RT	1	direct_host
Simian_foamy_virus	Cercopithecus_campbelli	1	1	1	saliva, blood	0	0	2	asymptomatic	1	high	Not pathogenic - no evidence of disease in nonhuman primate hosts or humans	wild	PCR	PRIMATES	CERCOPITHECIDAE	Cercopithecus	campbelli	Group_VI	Retroviridae	Spumaretrovirinae	Spumavirus	13246	FALSE	FALSE	SS	RNA	enveloped	Mouinga-Ondeme and Kazanji 2013; Calattini et al. 2039	Schweizer et al. 1995	0	3627.73	1.02	396	180.8	71	6	0.549271	1	1	0.899616	0.786835	ssRNA-RT	1	direct_host
Simian_foamy_virus	Cercopithecus_erythrotis	1	1	1	saliva, blood	0	0	2	asymptomatic	1	high	Not pathogenic - no evidence of disease in nonhuman primate hosts or humans	wild	PCR	PRIMATES	CERCOPITHECIDAE	Cercopithecus	erythrotis	Group_VI	Retroviridae	Spumaretrovirinae	Spumavirus	13246	FALSE	FALSE	SS	RNA	enveloped	Mouinga-Ondeme and Kazanji 2013; Calattini et al. 2033	Hussain et al. 2003	0	3254.98	1.02	319.73	166.63	16	1	0.549271	1	1	0.899616	0.786835	ssRNA-RT	1	direct_host
Simian_foamy_virus	Chlorocebus_pygerythrus	1	1	1	saliva, blood	0	0	2	asymptomatic	1	high	Not pathogenic - no evidence of disease in nonhuman primate hosts or humans	wild	PCR	PRIMATES	CERCOPITHECIDAE	Chlorocebus	pygerythrus	Group_VI	Retroviridae	Spumaretrovirinae	Spumavirus	13246	FALSE	FALSE	SS	RNA	enveloped	Mouinga-Ondeme and Kazanji 2013; Calattini et al. 2032	Hussain et al. 2003	0	2267.96	1	369.6	165	11	3	0.59005	1	3	0.899616	0.786835	ssRNA-RT	1	direct_host
Simian_foamy_virus	Cercopithecus_lhoesti	1	1	1	saliva, blood	0	0	2	asymptomatic	1	high	Not pathogenic - no evidence of disease in nonhuman primate hosts or humans	wild	PCR	PRIMATES	CERCOPITHECIDAE	Cercopithecus	lhoesti	Group_VI	Retroviridae	Spumaretrovirinae	Spumavirus	13246	FALSE	FALSE	SS	RNA	enveloped	Mouinga-Ondeme and Kazanji 2013; Calattini et al. 2020	Hussain et al. 2003	0	5307.47	1	192	166.63	26	2	0.549271	1	1	0.899616	0.786835	ssRNA-RT	1	direct_host
Simian_foamy_virus	Gorilla_gorilla	1	1	1	saliva, blood	0	0	2	asymptomatic	1	high	Not pathogenic - no evidence of disease in nonhuman primate hosts or humans	wild	PCR	PRIMATES	HOMINIDAE	Gorilla	gorilla	Group_VI	Retroviridae	Spumaretrovirinae	Spumavirus	13246	FALSE	FALSE	SS	RNA	enveloped	Mouinga-Ondeme and Kazanji 2013; Calattini et al. 2018	Hussain et al. 2003	0	112589	1.05	648	257	2396	301	0.160127	7	10	0.899616	0.786835	ssRNA-RT	1	direct_host
Simian_foamy_virus	Cercopithecus_diana	1	1	1	saliva, blood	0	0	2	asymptomatic	1	high	Not pathogenic - no evidence of disease in nonhuman primate hosts or humans	wild	PCR	PRIMATES	CERCOPITHECIDAE	Cercopithecus	diana	Group_VI	Retroviridae	Spumaretrovirinae	Spumavirus	13246	FALSE	FALSE	SS	RNA	enveloped	Mouinga-Ondeme and Kazanji 2013; Calattini et al. 2037	Hussain et al. 2003	0	4358.91	1.01	447.6	166.63	115	10	0.549271	1	1	0.899616	0.786835	ssRNA-RT	1	direct_host
Simian_foamy_virus	Papio_papio	1	1	1	saliva, blood	0	0	2	asymptomatic	1	high	Not pathogenic - no evidence of disease in nonhuman primate hosts or humans	wild	PCR	PRIMATES	CERCOPITHECIDAE	Papio	papio	Group_VI	Retroviridae	Spumaretrovirinae	Spumavirus	13246	FALSE	FALSE	SS	RNA	enveloped	Mouinga-Ondeme and Kazanji 2013; Calattini et al. 2010	Hussain et al. 2003	0	18026	1.01	480	184.42	316	56	0.404624	1	1	0.899616	0.786835	ssRNA-RT	1	direct_host
Simian_foamy_virus	Procolobus_badius	1	1	1	saliva, blood	0	0	2	asymptomatic	1	high	Not pathogenic - no evidence of disease in nonhuman primate hosts or humans	wild	PCR	PRIMATES	CERCOPITHECIDAE	Procolobus	badius	Group_VI	Retroviridae	Spumaretrovirinae	Spumavirus	13246	FALSE	FALSE	SS	RNA	enveloped	Mouinga-Ondeme and Kazanji 2013; Calattini et al. 2042	Goldberg et al. 2009	0	8430	1	360	151.46	85	4	0.786835	1	1	0.899616	0.786835	ssRNA-RT	1	direct_host
Simian_foamy_virus	Colobus_guereza	1	1	1	saliva, blood	0	0	2	asymptomatic	1	high	Not pathogenic - no evidence of disease in nonhuman primate hosts or humans	wild	PCR	PRIMATES	CERCOPITHECIDAE	Colobus	guereza	Group_VI	Retroviridae	Spumaretrovirinae	Spumavirus	13246	FALSE	FALSE	SS	RNA	enveloped	Mouinga-Ondeme and Kazanji 2013; Calattini et al. 2021	Hussain et al. 2003	0	9925.88	1	294	169.02	226	45	0.456876	1	2	0.899616	0.786835	ssRNA-RT	1	direct_host
Simian_foamy_virus	Nomascus_leucogenys	1	1	1	saliva, blood	0	0	2	asymptomatic	1	high	Not pathogenic - no evidence of disease in nonhuman primate hosts or humans	wild	Isolation	PRIMATES	HYLOBATIDAE	Nomascus	leucogenys	Group_VI	Retroviridae	Spumaretrovirinae	Spumavirus	13246	FALSE	FALSE	SS	RNA	enveloped	Mouinga-Ondeme and Kazanji 2013; Calattini et al. 2015	Hussain et al. 2003	0	7320	1	336	212.917	29	2	0.291627	1	1	0.899616	0.786835	ssRNA-RT	1	direct_host
Simian_foamy_virus	Cercocebus_chrysogaster	1	1	1	saliva, blood	0	0	2	asymptomatic	1	high	Not pathogenic - no evidence of disease in nonhuman primate hosts or humans	wild	PCR	PRIMATES	CERCOPITHECIDAE	Cercocebus	chrysogaster	Group_VI	Retroviridae	Spumaretrovirinae	Spumavirus	13246	FALSE	FALSE	SS	RNA	enveloped	Mouinga-Ondeme and Kazanji 2013; Calattini et al. 2011	Schweizer et al. 1995	0	9000	1	360	170	19	7	0.406803	1	1	0.899616	0.786835	ssRNA-RT	1	direct_host
Simian_foamy_virus	Cercocebus_torquatus	1	1	1	saliva, blood	0	0	2	asymptomatic	1	high	Not pathogenic - no evidence of disease in nonhuman primate hosts or humans	wild	PCR	PRIMATES	CERCOPITHECIDAE	Cercocebus	torquatus	Group_VI	Retroviridae	Spumaretrovirinae	Spumavirus	13246	FALSE	FALSE	SS	RNA	enveloped	Mouinga-Ondeme and Kazanji 2013; Calattini et al. 2036	Hussain et al. 2003	0	7293.07	1.01	360	168.98	119	13	0.406803	1	1	0.899616	0.786835	ssRNA-RT	1	direct_host
Simian_foamy_virus	Cercopithecus_pogonias	1	1	1	saliva, blood	0	0	2	asymptomatic	1	high	Not pathogenic - no evidence of disease in nonhuman primate hosts or humans	wild	PCR	PRIMATES	CERCOPITHECIDAE	Cercopithecus	pogonias	Group_VI	Retroviridae	Spumaretrovirinae	Spumavirus	13246	FALSE	FALSE	SS	RNA	enveloped	Mouinga-Ondeme and Kazanji 2013; Calattini et al. 2026	Schweizer et al. 1995	0	3578.27	1.01	289.2	169.51	43	3	0.549271	1	1	0.899616	0.786835	ssRNA-RT	1	direct_host
Simian_foamy_virus	Cercopithecus_cephus	1	1	1	saliva, blood	0	0	2	asymptomatic	1	high	Not pathogenic - no evidence of disease in nonhuman primate hosts or humans	wild	PCR	PRIMATES	CERCOPITHECIDAE	Cercopithecus	cephus	Group_VI	Retroviridae	Spumaretrovirinae	Spumavirus	13246	FALSE	FALSE	SS	RNA	enveloped	Mouinga-Ondeme and Kazanji 2013; Calattini et al. 2040	Schweizer et al. 1995	0	3444.88	1.01	276	169.51	52	9	0.549271	1	2	0.899616	0.786835	ssRNA-RT	1	direct_host
Simian_foamy_virus	Lophocebus_albigena	1	1	1	saliva, blood	0	0	2	asymptomatic	1	high	Not pathogenic - no evidence of disease in nonhuman primate hosts or humans	wild	PCR	PRIMATES	CERCOPITHECIDAE	Lophocebus	albigena	Group_VI	Retroviridae	Spumaretrovirinae	Spumavirus	13246	FALSE	FALSE	SS	RNA	enveloped	Mouinga-Ondeme and Kazanji 2013; Calattini et al. 2022	Hussain et al. 2003	0	7418.71	1.01	392.4	182.64	68	4	0.421167	2	3	0.899616	0.786835	ssRNA-RT	1	direct_host
Simian_foamy_virus	Papio_cynocephalus	1	1	1	saliva, blood	0	0	2	asymptomatic	1	high	Not pathogenic - no evidence of disease in nonhuman primate hosts or humans	wild	PCR	PRIMATES	CERCOPITHECIDAE	Papio	cynocephalus	Group_VI	Retroviridae	Spumaretrovirinae	Spumavirus	13246	FALSE	FALSE	SS	RNA	enveloped	Mouinga-Ondeme and Kazanji 2013; Calattini et al. 2016	Hussain et al. 2003	0	15822.1	1.01	540	172.99	872	162	0.414726	3	12	0.899616	0.786835	ssRNA-RT	1	direct_host
Simian_foamy_virus	Mandrillus_leucophaeus	1	1	1	saliva, blood	0	0	2	asymptomatic	1	high	Not pathogenic - no evidence of disease in nonhuman primate hosts or humans	wild	PCR	PRIMATES	CERCOPITHECIDAE	Mandrillus	leucophaeus	Group_VI	Retroviridae	Spumaretrovirinae	Spumavirus	13246	FALSE	FALSE	SS	RNA	enveloped	Mouinga-Ondeme and Kazanji 2013; Calattini et al. 2044	Hussain et al. 2003	0	14253.3	1.01	400.8	179.22	77	17	0.429648	2	3	0.899616	0.786835	ssRNA-RT	1	direct_host
Simian_foamy_virus	Saimiri_sciureus	1	1	1	saliva, blood	0	0	2	asymptomatic	1	high	Not pathogenic - no evidence of disease in nonhuman primate hosts or humans	wild	Isolation	PRIMATES	CEBIDAE	Saimiri	sciureus	Group_VI	Retroviridae	Spumaretrovirinae	Spumavirus	13246	FALSE	FALSE	SS	RNA	enveloped	Mouinga-Ondeme and Kazanji 2013; Calattini et al. 2009	Johnston et al. 1971	0	749.47	1	324	164.09	723	146	0.613822	2	5	0.899616	0.786835	ssRNA-RT	1	direct_host
Simian_foamy_virus	Cercopithecus_mitis	1	1	1	saliva, blood	0	0	2	asymptomatic	1	high	Not pathogenic - no evidence of disease in nonhuman primate hosts or humans	wild	PCR	PRIMATES	CERCOPITHECIDAE	Cercopithecus	mitis	Group_VI	Retroviridae	Spumaretrovirinae	Spumavirus	13246	FALSE	FALSE	SS	RNA	enveloped	Mouinga-Ondeme and Kazanji 2013; Calattini et al. 2013	Hussain et al. 2003	0	5041.29	1	325.2	138.39	267	24	0.549271	1	2	0.899616	0.786835	ssRNA-RT	1	direct_host
Simian_foamy_virus	Pongo_pygmaeus	1	1	1	saliva, blood	0	0	2	asymptomatic	1	high	Not pathogenic - no evidence of disease in nonhuman primate hosts or humans	wild	PCR	PRIMATES	HOMINIDAE	Pongo	pygmaeus	Group_VI	Retroviridae	Spumaretrovirinae	Spumavirus	13246	FALSE	FALSE	SS	RNA	enveloped	Mouinga-Ondeme and Kazanji 2013; Calattini et al. 2029	Hussain et al. 2003	0	53408.3	1.07	720	259.42	1544	170	0.228121	2	6	0.899616	0.786835	ssRNA-RT	1	direct_host
Simian_foamy_virus	Papio_hamadryas	1	1	1	saliva, blood	0	0	2	asymptomatic	1	high	Not pathogenic - no evidence of disease in nonhuman primate hosts or humans	wild	PCR	PRIMATES	CERCOPITHECIDAE	Papio	hamadryas	Group_VI	Retroviridae	Spumaretrovirinae	Spumavirus	13246	FALSE	FALSE	SS	RNA	enveloped	Mouinga-Ondeme and Kazanji 2013; Calattini et al. 2047	Hussain et al. 2003	0	14007.1	1.01	450	180	616	75	0.391908	3	4	0.899616	0.786835	ssRNA-RT	1	direct_host
Simian_foamy_virus	Macaca_cyclopis	1	1	1	saliva, blood	0	0	2	asymptomatic	1	high	Not pathogenic - no evidence of disease in nonhuman primate hosts or humans	wild	PCR	PRIMATES	CERCOPITHECIDAE	Macaca	cyclopis	Group_VI	Retroviridae	Spumaretrovirinae	Spumavirus	13246	FALSE	FALSE	SS	RNA	enveloped	Mouinga-Ondeme and Kazanji 2013; Calattini et al. 2035	Schweizer et al. 1995	0	5748.94	1	360	161.06	161	40	0.3835	2	2	0.899616	0.786835	ssRNA-RT	1	direct_host
Simian_foamy_virus	Macaca_mulatta	1	1	1	saliva, blood	0	0	2	asymptomatic	1	high	Not pathogenic - no evidence of disease in nonhuman primate hosts or humans	wild	PCR	PRIMATES	CERCOPITHECIDAE	Macaca	mulatta	Group_VI	Retroviridae	Spumaretrovirinae	Spumavirus	13246	FALSE	FALSE	SS	RNA	enveloped	Mouinga-Ondeme and Kazanji 2013; Calattini et al. 2038	Schweizer et al. 1995	0	6455.19	1.01	432	166.07	2471	386	0.387936	3	15	0.899616	0.786835	ssRNA-RT	1	direct_host
Simian_foamy_virus	Pan_paniscus	1	1	1	saliva, blood	0	0	2	asymptomatic	1	high	Not pathogenic - no evidence of disease in nonhuman primate hosts or humans	wild	PCR	PRIMATES	HOMINIDAE	Pan	paniscus	Group_VI	Retroviridae	Spumaretrovirinae	Spumavirus	13246	FALSE	FALSE	SS	RNA	enveloped	Mouinga-Ondeme and Kazanji 2013; Calattini et al. 2017	Schweizer et al. 1995	0	35119.9	1.01	576	235.24	856	45	0.122517	6	6	0.899616	0.786835	ssRNA-RT	1	direct_host
Simian_foamy_virus	Theropithecus_gelada	1	1	1	saliva, blood	0	0	2	asymptomatic	1	high	Not pathogenic - no evidence of disease in nonhuman primate hosts or humans	wild	PCR	PRIMATES	CERCOPITHECIDAE	Theropithecus	gelada	Group_VI	Retroviridae	Spumaretrovirinae	Spumavirus	13246	FALSE	FALSE	SS	RNA	enveloped	Mouinga-Ondeme and Kazanji 2013; Calattini et al. 2046	Hussain et al. 2003	0	15964.1	1.01	336	178.64	236	27	0.396383	1	1	0.899616	0.786835	ssRNA-RT	1	direct_host
Simian_foamy_virus	Pongo_abelii	1	1	1	saliva, blood	0	0	2	asymptomatic	1	high	Not pathogenic - no evidence of disease in nonhuman primate hosts or humans	wild	PCR	PRIMATES	HOMINIDAE	Pongo	abelii	Group_VI	Retroviridae	Spumaretrovirinae	Spumavirus	13246	FALSE	FALSE	SS	RNA	enveloped	Mouinga-Ondeme and Kazanji 2013; Calattini et al. 2023	Hussain et al. 2003	0	39696.1	1.07	696	251	198	26	0.245219	1	2	0.899616	0.786835	ssRNA-RT	1	direct_host
Simian_foamy_virus	Macaca_silenus	1	1	1	saliva, blood	0	0	2	asymptomatic	1	high	Not pathogenic - no evidence of disease in nonhuman primate hosts or humans	wild	PCR	PRIMATES	CERCOPITHECIDAE	Macaca	silenus	Group_VI	Retroviridae	Spumaretrovirinae	Spumavirus	13246	FALSE	FALSE	SS	RNA	enveloped	Mouinga-Ondeme and Kazanji 2013; Calattini et al. 2028	Hussain et al. 2003	0	5995.25	1.01	480	172	232	15	0.392742	1	1	0.899616	0.786835	ssRNA-RT	1	direct_host
Simian_foamy_virus	Macaca_sylvanus	1	1	1	saliva, blood	0	0	2	asymptomatic	1	high	Not pathogenic - no evidence of disease in nonhuman primate hosts or humans	wild	PCR	PRIMATES	CERCOPITHECIDAE	Macaca	sylvanus	Group_VI	Retroviridae	Spumaretrovirinae	Spumavirus	13246	FALSE	FALSE	SS	RNA	enveloped	Mouinga-Ondeme and Kazanji 2013; Calattini et al. 2014	Hussain et al. 2003	0	11471.5	1.02	264	164.84	282	16	0.378601	2	2	0.899616	0.786835	ssRNA-RT	1	direct_host
Simian_foamy_virus	Cercopithecus_solatus	1	1	1	saliva, blood	0	0	2	asymptomatic	1	high	Not pathogenic - no evidence of disease in nonhuman primate hosts or humans	wild	PCR	PRIMATES	CERCOPITHECIDAE	Cercopithecus	solatus	Group_VI	Retroviridae	Spumaretrovirinae	Spumavirus	13246	FALSE	FALSE	SS	RNA	enveloped	Mouinga-Ondeme and Kazanji 2013; Calattini et al. 2025	Schweizer et al. 1995	0	5256.91	1.01	319.73	166.63	19	1	0.549271	1	1	0.899616	0.786835	ssRNA-RT	1	direct_host
Simian_foamy_virus	Allenopithecus_nigroviridis	1	1	1	saliva, blood	0	0	2	asymptomatic	1	high	Not pathogenic - no evidence of disease in nonhuman primate hosts or humans	wild	PCR	PRIMATES	CERCOPITHECIDAE	Allenopithecus	nigroviridis	Group_VI	Retroviridae	Spumaretrovirinae	Spumavirus	13246	FALSE	FALSE	SS	RNA	enveloped	Mouinga-Ondeme and Kazanji 2013; Calattini et al. 2008	Schweizer et al. 1995	0	4749.96	1.01	276	165	27	7	0.466889	1	1	0.899616	0.786835	ssRNA-RT	1	direct_host
Simian_foamy_virus	Cercopithecus_neglectus	1	1	1	saliva, blood	0	0	2	asymptomatic	1	high	Not pathogenic - no evidence of disease in nonhuman primate hosts or humans	wild	PCR	PRIMATES	CERCOPITHECIDAE	Cercopithecus	neglectus	Group_VI	Retroviridae	Spumaretrovirinae	Spumavirus	13246	FALSE	FALSE	SS	RNA	enveloped	Mouinga-Ondeme and Kazanji 2013; Calattini et al. 2027	Hussain et al. 2003	0	5324.52	1.02	315.6	172.07	84	21	0.549271	1	2	0.899616	0.786835	ssRNA-RT	1	direct_host
Simian_foamy_virus	Cercocebus_atys	1	1	1	saliva, blood	0	0	2	asymptomatic	1	high	Not pathogenic - no evidence of disease in nonhuman primate hosts or humans	wild	PCR	PRIMATES	CERCOPITHECIDAE	Cercocebus	atys	Group_VI	Retroviridae	Spumaretrovirinae	Spumavirus	13246	FALSE	FALSE	SS	RNA	enveloped	Mouinga-Ondeme and Kazanji 2013; Calattini et al. 2041	Hussain et al. 2003	0	6941.24	1.01	321.6	165.08	119	28	0.406803	1	2	0.899616	0.786835	ssRNA-RT	1	direct_host
Simian_foamy_virus	Macaca_fuscata	1	1	1	saliva, blood	0	0	2	asymptomatic	1	high	Not pathogenic - no evidence of disease in nonhuman primate hosts or humans	wild	PCR	PRIMATES	CERCOPITHECIDAE	Macaca	fuscata	Group_VI	Retroviridae	Spumaretrovirinae	Spumavirus	13246	FALSE	FALSE	SS	RNA	enveloped	Mouinga-Ondeme and Kazanji 2013; Calattini et al. 2043	Hussain et al. 2003	0	10114.8	1.02	396	172.99	1339	87	0.393434	4	5	0.899616	0.786835	ssRNA-RT	1	direct_host
Simian_foamy_virus	Pygathrix_nemaeus	1	1	1	saliva, blood	0	0	2	asymptomatic	1	high	Not pathogenic - no evidence of disease in nonhuman primate hosts or humans	wild	PCR	PRIMATES	CERCOPITHECIDAE	Pygathrix	nemaeus	Group_VI	Retroviridae	Spumaretrovirinae	Spumavirus	13246	FALSE	FALSE	SS	RNA	enveloped	Mouinga-Ondeme and Kazanji 2013; Calattini et al. 2030	Hussain et al. 2003	0	9411.1	1.01	300	182.88	111	17	0.449999	1	1	0.899616	0.786835	ssRNA-RT	1	direct_host
Simian_foamy_virus	Mandrillus_sphinx	1	1	1	saliva, blood	0	0	2	asymptomatic	1	high	Not pathogenic - no evidence of disease in nonhuman primate hosts or humans	wild	PCR	PRIMATES	CERCOPITHECIDAE	Mandrillus	sphinx	Group_VI	Retroviridae	Spumaretrovirinae	Spumavirus	13246	FALSE	FALSE	SS	RNA	enveloped	Mouinga-Ondeme and Kazanji 2013; Calattini et al. 2012	Hussain et al. 2003	0	16685.1	1.02	555.96	173.99	149	17	0.419763	2	3	0.899616	0.786835	ssRNA-RT	1	direct_host
Simian_foamy_virus	Cercopithecus_nictitans	1	1	1	saliva, blood	0	0	2	asymptomatic	1	high	Not pathogenic - no evidence of disease in nonhuman primate hosts or humans	wild	PCR	PRIMATES	CERCOPITHECIDAE	Cercopithecus	nictitans	Group_VI	Retroviridae	Spumaretrovirinae	Spumavirus	13246	FALSE	FALSE	SS	RNA	enveloped	Mouinga-Ondeme and Kazanji 2013; Calattini et al. 2031	Schweizer et al. 1995	0	5256.91	1	276	169.51	87	15	0.573865	3	4	0.899616	0.786835	ssRNA-RT	1	direct_host
Simian_foamy_virus	Procolobus_rufomitratus	1	1	1	saliva, blood	0	0	2	asymptomatic	1	high	Not pathogenic - no evidence of disease in nonhuman primate hosts or humans	wild	PCR	PRIMATES	CERCOPITHECIDAE	Procolobus	rufomitratus	Group_VI	Retroviridae	Spumaretrovirinae	Spumavirus	13246	FALSE	FALSE	SS	RNA	enveloped	Mouinga-Ondeme and Kazanji 2013; Calattini et al. 2024	Goldberg et al. 2009	0	8070	1.01	360	195	33	12	0.418401	1	2	0.899616	0.786835	ssRNA-RT	1	direct_host
Simian_foamy_virus	Callithrix_jacchus	1	1	1	saliva, blood	0	0	2	asymptomatic	1	high	Not pathogenic - no evidence of disease in nonhuman primate hosts or humans	wild	Isolation	PRIMATES	CALLITRICHIDAE	Callithrix	jacchus	Group_VI	Retroviridae	Spumaretrovirinae	Spumavirus	13246	FALSE	FALSE	SS	RNA	enveloped	Mouinga-Ondeme and Kazanji 2013; Calattini et al. 2048	Voevodin & Marx 2009	0	290.21	2.31	201.6	144	1136	154	0.608128	2	7	0.899616	0.786835	ssRNA-RT	1	direct_host
Simian_foamy_virus	Macaca_arctoides	1	1	1	saliva, blood	0	0	2	asymptomatic	1	high	Not pathogenic - no evidence of disease in nonhuman primate hosts or humans	wild	PCR	PRIMATES	CERCOPITHECIDAE	Macaca	arctoides	Group_VI	Retroviridae	Spumaretrovirinae	Spumavirus	13246	FALSE	FALSE	SS	RNA	enveloped	Mouinga-Ondeme and Kazanji 2013; Calattini et al. 2045	Hussain et al. 2003	0	9358.04	1.01	360	176.6	456	53	0.401324	2	2	0.899616	0.786835	ssRNA-RT	1	direct_host
Sin_Nombre_virus	Peromyscus_maniculatus	1	1	1	aerosolized excreta	35	35	1	hantavirus cardiopulmonary syndrome (HCPS)	1	high	Hantaviruses are endemic in North America - most HCPS cases are caused by Sin Nombre, but there are some Bayou and Black Creek. First identified outbreak in the 90s in the Four Corners region of the US; but then revealed evidence that there had been previous unidentified outbreaks	wild	Isolation	RODENTIA	CRICETIDAE	Peromyscus	maniculatus	Bunyavirales	Hantaviridae	NA	Orthohantavirus	12317	TRUE	TRUE	SS	RNA	enveloped	Clay et al. 2009; Richardson et al. 2013; https://www.cdc.gov/hantavirus/outbreaks/history.html	Acha & Szyfres 2003; Song et al. 1996	35	19.98	4.76	12	26.68	2216	399	0.682443	2	4	0.950161	0.89579	ssRNA(-)	1	direct_host
Sin_Nombre_virus	Neotoma_lepida	2	1	1	aerosolized excreta	35	35	1	hantavirus cardiopulmonary syndrome (HCPS)	1	high	Hantaviruses are endemic in North America - most HCPS cases are caused by Sin Nombre, but there are some Bayou and Black Creek. First identified outbreak in the 90s in the Four Corners region of the US; but then revealed evidence that there had been previous unidentified outbreaks	wild	PCR	RODENTIA	CRICETIDAE	Neotoma	lepida	Bunyavirales	Hantaviridae	NA	Orthohantavirus	12317	TRUE	TRUE	SS	RNA	enveloped	Clay et al. 2009; Richardson et al. 2013; https://www.cdc.gov/hantavirus/outbreaks/history.html	Dearing et al. 1999	35	143.88	2.7	92.4	32.99	143	33	0.723297	1	2	0.950161	0.89579	ssRNA(-)	1	int_host
Sosuga_virus	Rousettus_aegyptiacus	1	1	1	bodily fluids, respiratory	0	0	1	febrile illness, oropharynx ulcerations	1	low	There's only been one human case	wild	PCR	CHIROPTERA	PTEROPODIDAE	Rousettus	aegyptiacus	Mononegavirales	Paramyxoviridae	NA	Rubulavirus	15480	TRUE	FALSE	SS	RNA	enveloped	Amman et al. 2015; Han and Worobey 2011	Amman et al. 2015	0	134	1.07	274.8	123.39	258	47	0.705804	4	5	NA	0.705804	ssRNA(-)	1	direct_host
Suid_herpesvirus_1	Mustela_lutreola	2	0	4	nasal fluid, saliva, air-borne	0	0	1	endophthalmitis	1	high		domestic	Isolation	CARNIVORA	MUSTELIDAE	Mustela	lutreola	Herpesvirales	Herpesviridae	Alphaherpesvirinae	Varicellovirus	141126	FALSE	FALSE	DS	DNA	enveloped	Christensen and Lomniczi 1993; Ai et al. 2018; https://wwwnc.cdc.gov/eid/article/24/6/pdfs/17-1612.pdf	Christodoulou et al. 1970	0	566.44	4.5	120	43.74	500	87	0.68069	1	1	0.623958	0.77642	dsDNA	1	secondary_only
Suid_herpesvirus_1	Canis_lupus	2	0	4	nasal fluid, saliva, air-borne	0	0	1	endophthalmitis	1	high		domestic	Isolation	CARNIVORA	CANIDAE	Canis	familiaris	Herpesvirales	Herpesviridae	Alphaherpesvirinae	Varicellovirus	141126	FALSE	FALSE	DS	DNA	enveloped	Christensen and Lomniczi 1993; Ai et al. 2018; https://wwwnc.cdc.gov/eid/article/24/6/pdfs/17-1612.pdf	Eidson et al.1953	0	31756.5	4.98	354	63.5	3742	345	0.772511	1	3	0.623958	0.77642	dsDNA	1	secondary_only
Suid_herpesvirus_1	Puma_concolor	2	0	4	nasal fluid, saliva, air-borne	0	0	1	endophthalmitis	1	high		wild	Isolation	CARNIVORA	FELIDAE	Felis	concolor	Herpesvirales	Herpesviridae	Alphaherpesvirinae	Varicellovirus	141126	FALSE	FALSE	DS	DNA	enveloped	Christensen and Lomniczi 1993; Ai et al. 2018; https://wwwnc.cdc.gov/eid/article/24/6/pdfs/17-1612.pdf	Glass et al. 1994	0	53954.1	2.76	240	92.3	824	134	0.696024	0	7	0.623958	0.77642	dsDNA	1	secondary_only
Suid_herpesvirus_1	Sus_scrofa	1	1	3	nasal fluid, saliva, air-borne	0	0	1	endophthalmitis	1	high	Whether humans are susceptible has historically been controversial. But Ai et al. 2018 appears to be the first study that has isolated Suide herpesvirus 1 = pseudorabies (PVR). The only cases have been pig caretakers. Also interesting to note that the air-borne form of the pathogen is much more virulent than the directly/fluid transmitted virus	wild	Isolation	CETARTIODACTYLA	SUIDAE	Sus	scrofa	Herpesvirales	Herpesviridae	Alphaherpesvirinae	Varicellovirus	141126	FALSE	FALSE	DS	DNA	enveloped	Christensen and Lomniczi 1993; Ai et al. 2018; https://wwwnc.cdc.gov/eid/article/24/6/pdfs/17-1612.pdf	Pannwitz et al. 2010	0	84471.5	4.52	252	115.2	3932	1671	0.67177	13	41	0.623958	0.77642	dsDNA	1	direct_host
Suid_herpesvirus_1	Sus_scrofa	1	1	3	nasal fluid, saliva, air-borne	0	0	1	endophthalmitis	1	high	Whether humans are susceptible has historically been controversial. But Ai et al. 2018 appears to be the first study that has isolated Suide herpesvirus 1 = pseudorabies (PVR). The only cases have been pig caretakers. Also interesting to note that the air-borne form of the pathogen is much more virulent than the directly/fluid transmitted virus	domestic	PCR	CETARTIODACTYLA	SUIDAE	Sus	scrofa	Herpesvirales	Herpesviridae	Alphaherpesvirinae	Varicellovirus	141126	FALSE	FALSE	DS	DNA	enveloped	Christensen and Lomniczi 1993; Ai et al. 2018; https://wwwnc.cdc.gov/eid/article/24/6/pdfs/17-1612.pdf	Hahn et al. 2010	0	84471.5	4.52	252	115.2	3932	1671	0.67177	13	41	0.623958	0.77642	dsDNA	1	direct_host
Tai_forest_ebolavirus	Pan_troglodytes	1	1	4	bodily fluids (blood/sexual)	76	76	1	hemorrhagic fever	3	low	Only one tai forest case - so we proxied case fatality rate with Zaire Ebola	wild	Isolation	PRIMATES	HOMINIDAE	Pan	troglodytes	Mononegavirales	Filoviridae	NA	Ebolavirus	18935	TRUE	FALSE	SS	RNA	enveloped	Gonzalez et al. 2007	Le Guenno & Formentry 1995	76	45000	1.05	720	231.49	3960	505	0.130389	10	20	NA	0.130389	ssRNA(-)	1	direct_host
Tula_virus	Microtus_arvalis	1	1	1	aerosolized excreta, or saliva (via bite)	0	0	1	hemorrhagic fever with renal syndrome (HFRS)	1	high	Little is known about Tula pathogenicity - there have been some severe HFRS cases, but it's generally believed to have low pathogenicity in humans	wild	PCR	RODENTIA	CRICETIDAE	Microtus	arvalis	Bunyavirales	Hantaviridae	NA	Orthohantavirus	12066	TRUE	TRUE	SS	RNA	enveloped	Clement and Ranst 2016; Schmidt et al. 2016	Schlegel et al. 2012	0	26.9	4.99	36	21	2192	480	0.735741	3	4	0.489857	0.744025	ssRNA(-)	1	direct_host
Tula_virus	Microtus_subterraneus	1	1	1	aerosolized excreta, or saliva (via bite)	0	0	1	hemorrhagic fever with renal syndrome (HFRS)	1	high	Little is known about Tula pathogenicity - there have been some severe HFRS cases, but it's generally believed to have low pathogenicity in humans	wild	PCR	RODENTIA	CRICETIDAE	Microtus	subterraneus	Bunyavirales	Hantaviridae	NA	Orthohantavirus	12066	TRUE	TRUE	SS	RNA	enveloped	Clement and Ranst 2016; Schmidt et al. 2016	Korva et al. 2009	0	17.74	2.46	32.4	21	239	46	0.730693	1	1	0.489857	0.744025	ssRNA(-)	1	direct_host
Tula_virus	Microtus_levis	1	1	1	aerosolized excreta, or saliva (via bite)	0	0	1	hemorrhagic fever with renal syndrome (HFRS)	1	high	Little is known about Tula pathogenicity - there have been some severe HFRS cases, but it's generally believed to have low pathogenicity in humans	wild	PCR	RODENTIA	CRICETIDAE	Microtus	levis	Bunyavirales	Hantaviridae	NA	Orthohantavirus	12066	TRUE	TRUE	SS	RNA	enveloped	Clement and Ranst 2016; Schmidt et al. 2016	Schlegel et al. 2012	0	35.49	4.612	32.4	21.0575	32	5	0.728984	2	2	0.489857	0.744025	ssRNA(-)	1	direct_host
Tula_virus	Microtus_agrestis	1	1	1	aerosolized excreta, or saliva (via bite)	0	0	1	hemorrhagic fever with renal syndrome (HFRS)	1	high	Little is known about Tula pathogenicity - there have been some severe HFRS cases, but it's generally believed to have low pathogenicity in humans	wild	PCR	RODENTIA	CRICETIDAE	Microtus	agrestis	Bunyavirales	Hantaviridae	NA	Orthohantavirus	12066	TRUE	TRUE	SS	RNA	enveloped	Clement and Ranst 2016; Schmidt et al. 2016	Schmidt-Chanasit et al. 2009	0	35.87	4.65	39.6	20.72	1548	223	0.722485	4	9	0.489857	0.744025	ssRNA(-)	1	direct_host
Tula_virus	Arvicola_amphibius	1	1	1	aerosolized excreta, or saliva (via bite)	0	0	1	hemorrhagic fever with renal syndrome (HFRS)	1	high	Little is known about Tula pathogenicity - there have been some severe HFRS cases, but it's generally believed to have low pathogenicity in humans	wild	PCR	RODENTIA	CRICETIDAE	Arvicola	amphibius	Bunyavirales	Hantaviridae	NA	Orthohantavirus	12066	TRUE	TRUE	SS	RNA	enveloped	Clement and Ranst 2016; Schmidt et al. 2016	Schlegel et al. 2012	0	120	4.76	60	21.24	79	8	0.744025	1	1	0.489857	0.744025	ssRNA(-)	1	direct_host
Whitewater_Arroyo_virus	Neotoma_albigula	1	1	2	rodent excrement	100	100	1	hemorrhagic fever	1	high	Only 3 cases - all fatal	wild	Isolation	RODENTIA	CRICETIDAE	Neotoma	albigula	Group_V	Arenaviridae	NA	Arenavirus	10448	TRUE	TRUE	SS	RNA	enveloped	Fulhorst et al. 1996; Lele et al. 2003; https://www.cdc.gov/MMWR/preview/mmwrhtml/mm4931a1.htm; https://wwwnc.cdc.gov/eid/article/7/3/01-7305_article	Charrel & de Lamballerie 2010; Fulhorst et al. 1996	100	208.18	2.14	92.4	37	161	28	0.688359	1	1	0.598166	0.82734	ssRNA(+/-)	1	direct_host
Whitewater_Arroyo_virus	Neotoma_cinerea	1	1	2	rodent excrement	100	100	1	hemorrhagic fever	1	high	Only 3 cases - all fatal	wild	Isolation	RODENTIA	CRICETIDAE	Neotoma	cinerea	Group_V	Arenaviridae	NA	Arenavirus	10448	TRUE	TRUE	SS	RNA	enveloped	Fulhorst et al. 1996; Lele et al. 2003; https://www.cdc.gov/MMWR/preview/mmwrhtml/mm4931a1.htm; https://wwwnc.cdc.gov/eid/article/7/3/01-7305_article	Charrel & de Lamballerie 2010; Fulhorst et al. 2001	100	285.89	3.45	92.4	29.69	133	33	0.791326	1	1	0.598166	0.82734	ssRNA(+/-)	1	direct_host
Zaire_ebolavirus	Pan_troglodytes	2	1	4	bodily fluids (blood/sexual)	76	76	1	hemorrhagic fever	3	low	Spillover capacities estimated based on available information. Highest case mortality of all the human-infectious Ebola strains (Sudan species = 55%, Bundibugyo = 37%) (Lefebvre et al. 2014. Case fatality rates of Ebola virus diseases: A meta-analysisÉ)	wild	PCR	PRIMATES	HOMINIDAE	Pan	troglodytes	Mononegavirales	Filoviridae	NA	Ebolavirus	18959	TRUE	FALSE	SS	RNA	enveloped	Lahm et al. 2007. Morbidity and mortality of wild animals in relation to outbreaks of Ebola haemorrhagic fever; Lefebvre et al. 2014. Case fatality rates of Ebola virus diseases: a meta-analysis of World Health Organization data; Glynn et al. 2017. Asymptomatic infection and unrecognised Ebola virus disease in Ebola-affected households in Sierra Leone: a cross-sectional study using a new non-inva…	Leroy et al. 2004	76	45000	1.05	720	231.49	3960	505	0.130389	10	20	0.775329	0.789302	ssRNA(-)	1	int_host
Zaire_ebolavirus	Cephalophus_callipygus	2	1	4	bodily fluids (blood/sexual)	76	76	1	hemorrhagic fever	3	low	Spillover capacities estimated based on available information. Highest case mortality of all the human-infectious Ebola strains (Sudan species = 55%, Bundibugyo = 37%) (Lefebvre et al. 2014. Case fatality rates of Ebola virus diseases: A meta-analysisÉ)	wild	PCR	CETARTIODACTYLA	BOVIDAE	Cephalophus	callipygus	Mononegavirales	Filoviridae	NA	Ebolavirus	18959	TRUE	FALSE	SS	RNA	enveloped	Morvan et al. 1999; Lefebvre et al. 2014. Case fatality rates of Ebola virus diseases: a meta-analysis of World Health Organization data; Glynn et al. 2017. Asymptomatic infection and unrecognised Ebola virus disease in Ebola-affected households in Sierra Leone: a cross-sectional study using a new non-invasive assay for antibodies to Ebola virus.	Lahm et al. 2007	76	19079.2	1	122.04	126	15	1	0.689163	1	1	0.775329	0.789302	ssRNA(-)	1	int_host
Zaire_ebolavirus	Rousettus_aegyptiacus	1	1	1	bodily fluids (blood/sexual)	76	76	1	hemorrhagic fever	3	low	Spillover capacities estimated based on available information. Highest case mortality of all the human-infectious Ebola strains (Sudan species = 55%, Bundibugyo = 37%) (Lefebvre et al. 2014. Case fatality rates of Ebola virus diseases: A meta-analysisÉ)	wild	PCR	CHIROPTERA	PTEROPODIDAE	Rousettus	aegyptiacus	Mononegavirales	Filoviridae	NA	Ebolavirus	18959	TRUE	FALSE	SS	RNA	enveloped	Gonzalez et al. 2007. Ebolavirus and other filoviruses; Calisher et al. 2006; Swanepoel et al. 1996. Experimental inoculation of plants and animals with Ebola virus; Lefebvre et al. 2014. Case fatality rates of Ebola virus diseases: a meta-analysis of World Health Organization data; Glynn et al. 2017. Asymptomatic infection and unrecognised Ebola virus disease in Ebola-affected households in Sier…	Leroy et al. 2004	76	134	1.07	274.8	123.39	258	47	0.705804	4	5	0.775329	0.789302	ssRNA(-)	1	direct_host
Zaire_ebolavirus	Gorilla_gorilla	2	1	4	bodily fluids (blood/sexual)	76	76	1	hemorrhagic fever	3	low	Spillover capacities estimated based on available information. Highest case mortality of all the human-infectious Ebola strains (Sudan species = 55%, Bundibugyo = 37%) (Lefebvre et al. 2014. Case fatality rates of Ebola virus diseases: A meta-analysisÉ)	wild	PCR	PRIMATES	HOMINIDAE	Gorilla	gorilla	Mononegavirales	Filoviridae	NA	Ebolavirus	18959	TRUE	FALSE	SS	RNA	enveloped	Gonzalez et al. 2007. Ebolavirus and other filoviruses; Lefebvre et al. 2014. Case fatality rates of Ebola virus diseases: a meta-analysis of World Health Organization data; Glynn et al. 2017. Asymptomatic infection and unrecognised Ebola virus disease in Ebola-affected households in Sierra Leone: a cross-sectional study using a new non-invasive assay for antibodies to Ebola virus.	Leroy et al. 2004	76	112589	1.05	648	257	2396	301	0.160127	7	10	0.775329	0.789302	ssRNA(-)	1	int_host
Zaire_ebolavirus	Eidolon_helvum	1	1	1	bodily fluids (blood/sexual)	76	76	1	hemorrhagic fever	3	low	Spillover capacities estimated based on available information. Highest case mortality of all the human-infectious Ebola strains (Sudan species = 55%, Bundibugyo = 37%) (Lefebvre et al. 2014. Case fatality rates of Ebola virus diseases: A meta-analysisÉ)	wild	PCR	CHIROPTERA	PTEROPODIDAE	Eidolon	helvum	Mononegavirales	Filoviridae	NA	Ebolavirus	18959	TRUE	FALSE	SS	RNA	enveloped	Feldmann et al. 2004. Ebola virus ecology: a continuing mystery; Huijbregts et al. 2003. Ebola and the decline of gorilla Gorilla gorilla and chimpanzee Pan troglodytes populations in the Minkebe Forest, north-eastern Gabon; Lefebvre et al. 2014. Case fatality rates of Ebola virus diseases: a meta-analysis of World Health Organization data; Glynn et al. 2017. Asymptomatic infection and unrecognis…	Leroy et al. 2004	76	254.61	1.08	261.99	164.36	168	35	0.682566	3	4	0.775329	0.789302	ssRNA(-)	1	direct_host
Zaire_ebolavirus	Miniopterus_inflatus	1	1	1	bodily fluids (blood/sexual)	76	76	1	hemorrhagic fever	3	low	Spillover capacities estimated based on available information. Highest case mortality of all the human-infectious Ebola strains (Sudan species = 55%, Bundibugyo = 37%) (Lefebvre et al. 2014. Case fatality rates of Ebola virus diseases: A meta-analysisÉ)	wild	Isolation	CHIROPTERA	MINIOPTERIDAE	Miniopterus	inflatus	Mononegavirales	Filoviridae	NA	Ebolavirus	18959	TRUE	FALSE	SS	RNA	enveloped	Gonzalez et al. 2007. Ebolavirus and other filoviruses; Lefebvre et al. 2014. Case fatality rates of Ebola virus diseases: a meta-analysis of World Health Organization data; Glynn et al. 2017. Asymptomatic infection and unrecognised Ebola virus disease in Ebola-affected households in Sierra Leone: a cross-sectional study using a new non-invasive assay for antibodies to Ebola virus.	https://www.sciencedaily.com/releases/2019/01/190124095156.htm	76	14.9	0.99	168	91.24	29	11	0.821778	1	1	0.775329	0.789302	ssRNA(-)	1	direct_host
Zaire_ebolavirus	Epomops_franqueti	1	1	1	bodily fluids (blood/sexual)	76	76	1	hemorrhagic fever	3	low	Spillover capacities estimated based on available information. Highest case mortality of all the human-infectious Ebola strains (Sudan species = 55%, Bundibugyo = 37%) (Lefebvre et al. 2014. Case fatality rates of Ebola virus diseases: A meta-analysisÉ)	wild	PCR	CHIROPTERA	PTEROPODIDAE	Epomops	franqueti	Mononegavirales	Filoviridae	NA	Ebolavirus	18959	TRUE	FALSE	SS	RNA	enveloped	Gonzalez et al. 2007. Ebolavirus and other filoviruses; Lefebvre et al. 2014. Case fatality rates of Ebola virus diseases: a meta-analysis of World Health Organization data; Glynn et al. 2017. Asymptomatic infection and unrecognised Ebola virus disease in Ebola-affected households in Sierra Leone: a cross-sectional study using a new non-invasive assay for antibodies to Ebola virus.	Leroy et al. 2004	76	118.99	1	274.8	161.77	24	6	0.692197	2	2	0.775329	0.789302	ssRNA(-)	1	direct_host
Zaire_ebolavirus	Micropteropus_pusillus	1	1	1	bodily fluids (blood/sexual)	76	76	1	hemorrhagic fever	3	low	Spillover capacities estimated based on available information. Highest case mortality of all the human-infectious Ebola strains (Sudan species = 55%, Bundibugyo = 37%) (Lefebvre et al. 2014. Case fatality rates of Ebola virus diseases: A meta-analysisÉ)	wild	PCR	CHIROPTERA	PTEROPODIDAE	Micropteropus	pusillus	Mononegavirales	Filoviridae	NA	Ebolavirus	18959	TRUE	FALSE	SS	RNA	enveloped	Gonzalez et al. 2007. Ebolavirus and other filoviruses; Lefebvre et al. 2014. Case fatality rates of Ebola virus diseases: a meta-analysis of World Health Organization data; Glynn et al. 2017. Asymptomatic infection and unrecognised Ebola virus disease in Ebola-affected households in Sierra Leone: a cross-sectional study using a new non-invasive assay for antibodies to Ebola virus.	Leroy et al. 2004	76	25.38	0.99	96	161.77	32	7	0.695315	1	2	0.775329	0.789302	ssRNA(-)	1	direct_host
Zaire_ebolavirus	Hypsignathus_monstrosus	1	1	1	bodily fluids (blood/sexual)	76	76	1	hemorrhagic fever	3	low	Spillover capacities estimated based on available information. Highest case mortality of all the human-infectious Ebola strains (Sudan species = 55%, Bundibugyo = 37%) (Lefebvre et al. 2014. Case fatality rates of Ebola virus diseases: A meta-analysisÉ)	wild	PCR	CHIROPTERA	PTEROPODIDAE	Hypsignathus	monstrosus	Mononegavirales	Filoviridae	NA	Ebolavirus	18959	TRUE	FALSE	SS	RNA	enveloped	Feldmann et al. 2004. Ebola virus ecology: a continuing mystery; Bermejo et al. 2006. Ebola outbreak killed 5000 gorillas; Lefebvre et al. 2014. Case fatality rates of Ebola virus diseases: a meta-analysis of World Health Organization data; Glynn et al. 2017. Asymptomatic infection and unrecognised Ebola virus disease in Ebola-affected households in Sierra Leone: a cross-sectional study using a n…	Leroy et al. 2004	76	336.97	1.4	360	125.14	48	14	0.789302	3	3	0.775329	0.789302	ssRNA(-)	1	direct_host
Zaire_ebolavirus	Myonycteris_torquata	1	1	1	bodily fluids (blood/sexual)	76	76	1	hemorrhagic fever	3	low	Spillover capacities estimated based on available information. Highest case mortality of all the human-infectious Ebola strains (Sudan species = 55%, Bundibugyo = 37%) (Lefebvre et al. 2014. Case fatality rates of Ebola virus diseases: A meta-analysisÉ)	wild	PCR	CHIROPTERA	PTEROPODIDAE	Myonycteris	torquata	Mononegavirales	Filoviridae	NA	Ebolavirus	18959	TRUE	FALSE	SS	RNA	enveloped	Gonzalez et al. 2007. Ebolavirus and other filoviruses; Lefebvre et al. 2014. Case fatality rates of Ebola virus diseases: a meta-analysis of World Health Organization data; Glynn et al. 2017. Asymptomatic infection and unrecognised Ebola virus disease in Ebola-affected households in Sierra Leone: a cross-sectional study using a new non-invasive assay for antibodies to Ebola virus.	Leroy et al. 2004	76	44.92	1	360	152.083	24	6	0.660007	1	1	0.775329	0.789302	ssRNA(-)	1	direct_host

## Sheet: Table S2
Table S2. Database of all viruses with associated virus traits (n=345 unique viruses)
vVirusNameCorrected	Family	Order	Genus	ReverseZoonoses	IsHoSa	IsHoSa.stringent	vGenomeMinLength	vGenomeMaxLength	vGenomeAveLength	vWOKcites	vPubMedCites	vCytoReplicTF	vSegmentedTF	vVectorYNna	vSSoDS	vDNAoRNA	vEnvelope	IsZoonotic	IsZoonotic.stringent	Genome.comp	max_breadth	mean_breadth	median_breadth	max.hum.dist	notes
Adeno-associated_virus-1	Parvoviridae	Unassigned	Dependovirus	0	1	0	NA	NA	4718	54	14	FALSE	FALSE	NA	SS	DNA	non-enveloped	1	0	ssDNA(+/-)	0.633319	0.633319	0.633319	0.589478
African_green_monkey_polyomavirus	Polyomaviridae	Unassigned	Polyomavirus	0	1	0	NA	NA	5270	1	0	TRUE	FALSE	N	DS	DNA	non-enveloped	1	0	dsDNA	0	0	0	0.589478
African_green_monkey_simian_foamy_virus	Retroviridae	Ortervirales	Spumaretrovirinae	0	0	0	NA	NA	13111	1	14	FALSE	FALSE	N	SS	RNA	enveloped	0	0	ssRNA-RT	0	0	0	0.589478
Alcelaphine_herpesvirus_1	Herpesviridae	Herpesvirales	Macavirus	0	0	0	NA	NA	130608	102	88	FALSE	FALSE	N	DS	DNA	enveloped	0	0	dsDNA	0.366936	0.28526	0.284949	0.745671
Alcelaphine_herpesvirus_2	Herpesviridae	Herpesvirales	Macavirus	0	0	0	NA	NA	135000	2	3	FALSE	FALSE	N	DS	DNA	enveloped	0	0	dsDNA	0.211552	0.177753	0.209266	0.683652
Aleutian_mink_disease_virus	Parvoviridae	Unassigned	Amdovirus	0	1	0	NA	NA	4801	204	195	FALSE	FALSE	NA	SS	DNA	non-enveloped	1	0	ssDNA(+/-)	0.219299	0.191592	0.187336	0.712654
Allpaahuayo_virus	Arenaviridae	Bunyavirales	Arenavirus	0	0	0	NA	NA	10435	1	1	TRUE	TRUE	N	SS	RNA	enveloped	0	0	ssRNA(+/-)	0.128827	0.128827	0.128827	0.802855
Amapari_virus	Arenaviridae	Bunyavirales	Arenavirus	0	0	0	NA	NA	10387	9	5	TRUE	TRUE	N	SS	RNA	enveloped	0	0	ssRNA(+/-)	0.556926	0.394081	0.450088	0.866947
Andes_virus	Hantaviridae	Bunyavirales	Orthohantavirus	0	1	1	NA	NA	10233	157	95	TRUE	TRUE	N	SS	RNA	enveloped	1	1	ssRNA(-)	0.624938	0.401892	0.418002	0.877599
Araraquara_virus	Hantaviridae	Bunyavirales	Orthohantavirus	0	1	NA	NA	NA	12000	NA	94	TRUE	TRUE	N	SS	RNA	enveloped	1	0	ssRNA(-)	NA	NA	NA	0.844881
Aravan_virus	Rhabdoviridae	Mononegavirales	Lyssavirus	0	0	0	NA	NA	11918	10	4	TRUE	FALSE	N	SS	RNA	enveloped	0	0	ssRNA(-)	0.0159474	0.0159474	0.0159474	0.88822
Arctic_squirrel_hepatitis_virus	Hepadnaviridae	Unassigned	Orthohepadnavirus	0	0	0	NA	NA	3302	1	1	FALSE	FALSE	N	DS	DNA	enveloped	0	0	dsDNA-RT	0	0	0	0.815241
Ateline_herpesvirus_1	Herpesviridae	Herpesvirales	Herpesviridae	0	0	0	NA	NA	152000	0	0	FALSE	FALSE	N	DS	DNA	enveloped	0	0	dsDNA	0	0	0	0.528817
Australian_bat_lyssavirus	Rhabdoviridae	Mononegavirales	Lyssavirus	0	1	1	NA	NA	11822	75	59	TRUE	FALSE	N	SS	RNA	enveloped	1	1	ssRNA(-)	0.673767	0.41818	0.498791	0.881401
Baboon_orthoreovirus	Reoviridae	Unassigned	Orthoreovirus	0	0	0	887	3903	22435	0	0	TRUE	TRUE	N	DS	RNA	non-enveloped	0	0	dsRNA	0	0	0	0.414726
Baboon_polyomavirus_2	Polyomaviridae	Unassigned	Polyomavirus	0	0	0	NA	NA	5181	0	0	TRUE	FALSE	N	DS	DNA	non-enveloped	0	0	dsDNA	0	0	0	0.402225
Barur_virus	Rhabdoviridae	Mononegavirales	Ledantevirus	0	0	0	NA	NA	NA	1	2	FALSE	FALSE	N	SS	RNA	enveloped	0	0	ssRNA(-)	0	0	0	0.664981
Bayou_virus	Hantaviridae	Bunyavirales	Orthohantavirus	0	1	1	3677	NA	12155	13	8	TRUE	TRUE	N	SS	RNA	enveloped	1	1	ssRNA(-)	0.491804	0.412767	0.458796	0.80769
Bear_Canyon_virus	Arenaviridae	Bunyavirales	Mammarenavirus	0	0	0	NA	NA	10441	2	2	TRUE	TRUE	N	SS	RNA	enveloped	0	0	ssRNA(+/-)	0.368826	0.368826	0.368826	0.718593
Bivens_Arm_virus	Rhabdoviridae	Mononegavirales	Unassigned	0	0	0	NA	NA	NA	2	2	TRUE	FALSE	N	SS	RNA	enveloped	0	0	ssRNA(-)	0	0	0	0.675324
Black_Creek_Canal_virus	Hantaviridae	Bunyavirales	Orthohantavirus	0	1	1	NA	NA	15450	15	12	TRUE	TRUE	N	SS	RNA	enveloped	1	1	ssRNA(-)	0	0	0	0.801487
Border_disease_virus	Flaviviridae	Unassigned	Pestivirus	0	0	0	NA	NA	12333	306	252	TRUE	FALSE	N	SS	RNA	enveloped	0	0	ssRNA(+)	0.430543	0.269264	0.272853	0.745671
Borna_disease_virus	Bornaviridae	Mononegavirales	Bornavirus	0	1	1	NA	NA	8910	1038	718	FALSE	FALSE	N	SS	RNA	enveloped	1	1	ssRNA(-)	0.807757	0.544512	0.550058	0.849242
Bovine_adenovirus_A	Adenoviridae	Unassigned	Mastadenovirus	0	0	0	NA	NA	34185	393	2	FALSE	FALSE	N	DS	DNA	non-enveloped	0	0	dsDNA	0.228036	0.228036	0.228036	0.688182
Bovine_adenovirus_B	Adenoviridae	Unassigned	Mastadenovirus	0	0	0	NA	NA	34446	5	1	FALSE	FALSE	N	DS	DNA	non-enveloped	0	0	dsDNA	0.234247	0.234247	0.234247	0.682652
Bovine_adenovirus_C	Adenoviridae	Unassigned	Mastadenovirus	0	0	0	NA	NA	35500	1	1	FALSE	FALSE	N	DS	DNA	non-enveloped	0	0	dsDNA	0	0	0	0.682652
Bovine_adenovirus_D	Adenoviridae	Unassigned	Atadenovirus	0	0	0	NA	NA	31301	1	1	FALSE	FALSE	N	DS	DNA	non-enveloped	0	0	dsDNA	0	0	0	0.682652
Bovine_adenovirus_E	Adenoviridae	Unassigned	Atadenovirus	0	0	0	NA	NA	30000	2	2	FALSE	FALSE	N	DS	DNA	non-enveloped	0	0	dsDNA	0	0	0	0.682652
Bovine_astrovirus	Astroviridae	Unassigned	Mamastrovirus	0	0	0	6233	6530	6322.33	6	7	TRUE	FALSE	N	SS	RNA	non-enveloped	0	0	ssRNA(+)	0	0	0	0.682652
Bovine_coronavirus	Coronaviridae	Nidovirales	Coronavirus	0	0	0	NA	NA	31028	599	408	TRUE	FALSE	N	SS	RNA	enveloped	0	0	ssRNA(+)	0	0	0	0.682652
Bovine_enteric_calicivirus_strain_NB	Caliciviridae	Unassigned	Vesivirus	0	0	0	NA	NA	7453	0	0	TRUE	FALSE	N	SS	RNA	non-enveloped	0	0	ssRNA(+)	0	0	0	0.682652
Bovine_foamy_virus	Retroviridae	Ortervirales	Bovispumavirus	0	0	0	NA	NA	12002	20	20	FALSE	FALSE	N	SS	RNA	enveloped	0	0	ssRNA-RT	0	0	0	0.682652
Bovine_herpesvirus_1	Herpesviridae	Herpesvirales	Varicellovirus	0	0	0	NA	NA	140000	1317	2065	FALSE	FALSE	N	DS	DNA	enveloped	0	0	dsDNA	0.377648	0.250803	0.258528	0.754674
Bovine_herpesvirus_2	Herpesviridae	Herpesvirales	Simplexvirus	0	0	0	NA	NA	133000	37	132	FALSE	FALSE	N	DS	DNA	enveloped	0	0	dsDNA	0.874042	0.381274	0.290195	0.916423
Bovine_herpesvirus_4	Herpesviridae	Herpesvirales	Rhadinovirus	0	0	0	NA	NA	145000	168	163	FALSE	FALSE	N	DS	DNA	enveloped	0	0	dsDNA	0.377648	0.268576	0.278091	0.754674
Bovine_herpesvirus_5	Herpesviridae	Herpesvirales	Varicellovirus	0	0	0	NA	NA	140000	78	85	FALSE	FALSE	N	DS	DNA	enveloped	0	0	dsDNA	0	0	0	0.682652
Bovine_immunodeficiency_virus	Retroviridae	Ortervirales	Lentivirus	0	0	0	NA	NA	8482	327	236	FALSE	FALSE	N	SS	RNA	enveloped	0	0	ssRNA-RT	0.197599	0.197599	0.197599	0.711033
Bovine_leukemia_virus	Retroviridae	Ortervirales	Deltaretrovirus	0	1	0	NA	NA	8419	1886	1643	FALSE	FALSE	N	SS	RNA	enveloped	1	0	ssRNA-RT	0.167562	0.167562	0.167562	0.682652
Bovine_norovirus-CH126	Caliciviridae	Unassigned	Norovirus	0	0	0	NA	NA	7800	0	0	TRUE	FALSE	N	SS	RNA	non-enveloped	0	0	ssRNA(+)	0	0	0	0.682652
Bovine_norovirus-Jena	Caliciviridae	Unassigned	Norovirus	0	0	0	NA	NA	7338	0	0	TRUE	FALSE	N	SS	RNA	non-enveloped	0	0	ssRNA(+)	0	0	0	0.682652
Bovine_papillomavirus_1	Papillomaviridae	Unassigned	Deltapapillomavirus	0	0	0	NA	NA	7945	47	1013	FALSE	FALSE	N	DS	DNA	non-enveloped	0	0	dsDNA	0.407982	0.304176	0.394252	0.68902
Bovine_papillomavirus_3	Papillomaviridae	Unassigned	Xipapillomavirus	0	0	0	NA	NA	7276	2	0	FALSE	FALSE	N	DS	DNA	non-enveloped	0	0	dsDNA	0	0	0	0.682652
Bovine_papillomavirus_5	Papillomaviridae	Unassigned	Epsilonpapillomavirus	0	0	0	NA	NA	7841	0	1	FALSE	FALSE	N	DS	DNA	non-enveloped	0	0	dsDNA	0	0	0	0.682652
Bovine_papular_stomatitis_virus	Poxviridae	Unassigned	Parapoxvirus	0	1	1	NA	NA	134431	41	29	TRUE	FALSE	N	DS	DNA	enveloped	1	1	dsDNA	0	0	0	0.682652
Bovine_parainfluenza_virus_3	Paramyxoviridae	Mononegavirales	Respirovirus	0	0	0	15456	15480	15468	19	68	TRUE	FALSE	N	SS	RNA	enveloped	0	0	ssRNA(-)	0.47417	0.302841	0.209221	0.746102
Bovine_parvovirus	Parvoviridae	Unassigned	Bocavirus	0	0	0	NA	NA	5517	119	104	FALSE	FALSE	NA	SS	DNA	non-enveloped	0	0	ssDNA(+/-)	0	0	0	0.682652
Bovine_polyomavirus	Polyomaviridae	Unassigned	Polyomavirus	0	0	0	NA	NA	4697	24	19	TRUE	FALSE	N	DS	DNA	non-enveloped	0	0	dsDNA	0	0	0	0.682652
Bovine_respiratory_syncytial_virus	Paramyxoviridae	Mononegavirales	Pneumovirus	0	0	0	NA	NA	15140	593	601	TRUE	FALSE	N	SS	RNA	enveloped	0	0	ssRNA(-)	0.387589	0.281917	0.305048	0.764615
Bovine_torovirus	Coronaviridae	Nidovirales	Torovirus	0	0	0	NA	NA	28475	34	25	TRUE	FALSE	N	SS	RNA	enveloped	0	0	ssRNA(+)	0	0	0	0.682652
Bovine_viral_diarrhea_virus_1	Flaviviridae	Unassigned	Pestivirus	0	0	0	NA	NA	12573	170	184	TRUE	FALSE	N	SS	RNA	enveloped	0	0	ssRNA(+)	0.554975	0.296174	0.287853	0.763457
Bovine_viral_diarrhea_virus_2	Flaviviridae	Unassigned	Pestivirus	0	0	0	NA	NA	12255	170	161	TRUE	FALSE	N	SS	RNA	enveloped	0	0	ssRNA(+)	0.305626	0.271328	0.271281	0.745671
Bubaline_herpesvirus_1	Herpesviridae	Herpesvirales	Varicellovirus	0	0	0	NA	NA	125000	5	4	FALSE	FALSE	N	DS	DNA	enveloped	0	0	dsDNA	0	0	0	0.675324
Callitrichine_herpesvirus_1	Herpesviridae	Herpesvirales	Unassigned	0	0	0	NA	NA	NA	0	0	FALSE	FALSE	N	DS	DNA	enveloped	0	0	dsDNA	0	0	0	0.655279
Callitrichine_herpesvirus_3	Herpesviridae	Herpesvirales	Lymphocryptovirus	0	0	0	NA	NA	149696	4	4	FALSE	FALSE	N	DS	DNA	enveloped	0	0	dsDNA	0	0	0	0.608128
Camelpox_virus	Poxviridae	Unassigned	Orthopoxvirus	0	1	1	NA	NA	205719	71	51	TRUE	FALSE	N	DS	DNA	enveloped	1	1	dsDNA	0	0	0	0.766609
Canid_herpesvirus_1	Herpesviridae	Herpesvirales	Varicellovirus	0	0	0	NA	NA	125171	101	122	FALSE	FALSE	N	DS	DNA	enveloped	0	0	dsDNA	0.484176	0.40145	0.38348	0.77642
Canine_adenovirus	Adenoviridae	Unassigned	Mastadenovirus	0	0	0	NA	NA	30536	376	265	FALSE	FALSE	N	DS	DNA	non-enveloped	0	0	dsDNA	0.522618	0.345226	0.403041	0.77642
Canine_calicivirus	Caliciviridae	Unassigned	Unassigned	0	0	0	NA	NA	8513	21	21	TRUE	FALSE	N	SS	RNA	non-enveloped	0	0	ssRNA(+)	0	0	0	0.77642
Canine_coronavirus	Coronaviridae	Nidovirales	Coronavirus	0	0	0	27000	33000	30000	325	192	TRUE	FALSE	N	SS	RNA	enveloped	0	0	ssRNA(+)	0.0559192	0.0559192	0.0559192	0.772511
Canine_distemper_virus	Paramyxoviridae	Mononegavirales	Morbillivirus	0	1	1	NA	NA	15690	1804	1372	TRUE	FALSE	N	SS	RNA	enveloped	1	0	ssRNA(-)	0.846132	0.409247	0.392729	0.784329
Canine_minute_virus	Parvoviridae	Unassigned	Bocavirus	0	0	0	NA	NA	5097	17	11	FALSE	FALSE	NA	SS	DNA	non-enveloped	0	0	ssDNA(+/-)	0	0	0	0.77642
Canine_oral_papillomavirus	Papillomaviridae	Unassigned	Lambdapapillomavirus	0	0	0	NA	NA	8607	71	46	FALSE	FALSE	N	DS	DNA	non-enveloped	0	0	dsDNA	0	0	0	0.77642
Cano_Delgadito_virus	Hantaviridae	Bunyavirales	Orthohantavirus	0	0	0	NA	NA	11811	6	5	TRUE	TRUE	N	SS	RNA	enveloped	0	0	ssRNA(-)	0.469517	0.469517	0.469517	0.858466
Caprine_arthritis_encephalitis_virus	Retroviridae	Ortervirales	Lentivirus	0	0	0	NA	NA	9189	529	396	FALSE	FALSE	NA	SS	RNA	enveloped	0	0	ssRNA-RT	0.12162	0.12162	0.12162	0.745671
Caprine_herpesvirus_1	Herpesviridae	Herpesvirales	Varicellovirus	0	0	0	NA	NA	125000	55	57	FALSE	FALSE	N	DS	DNA	enveloped	0	0	dsDNA	0.282424	0.257097	0.278091	0.754674
Caviid_herpesvirus_1	Herpesviridae	Herpesvirales	Ictalurivirus	0	0	0	NA	NA	134000	1	1	FALSE	FALSE	N	DS	DNA	enveloped	0	0	dsDNA	0	0	0	0.810929
Caviid_herpesvirus_2	Herpesviridae	Herpesvirales	Unassigned	0	0	0	NA	NA	232678	0	0	FALSE	FALSE	N	DS	DNA	enveloped	0	0	dsDNA	0	0	0	0.810929
Caviid_herpesvirus_3	Herpesviridae	Herpesvirales	Ictalurivirus	0	0	0	NA	NA	134000	1	1	FALSE	FALSE	N	DS	DNA	enveloped	0	0	dsDNA	0	0	0	0.810929
Cercopithecine_herpesvirus_1	Herpesviridae	Herpesvirales	Simplexvirus	0	1	1	NA	NA	156789	90	251	FALSE	FALSE	N	DS	DNA	enveloped	1	1	dsDNA	0.231821	0.132708	0.109467	0.405899
Cercopithecine_herpesvirus_12	Herpesviridae	Herpesvirales	Lymphocryptovirus	0	0	0	NA	NA	170000	3	3	FALSE	FALSE	N	DS	DNA	enveloped	0	0	dsDNA	0	0	0	0.391908
Cercopithecine_herpesvirus_14	Herpesviridae	Herpesvirales	Lymphocryptovirus	0	0	0	NA	NA	180000	0	0	FALSE	FALSE	N	DS	DNA	enveloped	0	0	dsDNA	0	0	0	0.589022
Cercopithecine_herpesvirus_15	Herpesviridae	Herpesvirales	Lymphocryptovirus	0	0	0	NA	NA	171096	2	3	FALSE	FALSE	N	DS	DNA	enveloped	0	0	dsDNA	0	0	0	0.387936
Cercopithecine_herpesvirus_16	Herpesviridae	Herpesvirales	Simplexvirus	0	0	0	NA	NA	156487	4	4	FALSE	FALSE	N	DS	DNA	enveloped	0	0	dsDNA	0.0685688	0.0630142	0.0643729	0.418922
Cercopithecine_herpesvirus_17	Herpesviridae	Herpesvirales	Rhadinovirus	0	0	0	NA	NA	133719	1	1	FALSE	FALSE	N	DS	DNA	enveloped	0	0	dsDNA	0	0	0	0.387936
Cercopithecine_herpesvirus_2	Herpesviridae	Herpesvirales	Simplexvirus	0	0	0	NA	NA	150000	23	4	FALSE	FALSE	N	DS	DNA	enveloped	0	0	dsDNA	0.663849	0.663849	0.663849	0.589022
Cercopithecine_herpesvirus_5	Herpesviridae	Herpesvirales	Cytomegalovirus	0	0	0	NA	NA	226205	1	1	FALSE	FALSE	N	DS	DNA	enveloped	0	0	dsDNA	0	0	0	0.589478
Cercopithecine_herpesvirus_8	Herpesviridae	Herpesvirales	Cytomegalovirus	0	0	0	NA	NA	221454	1	1	FALSE	FALSE	N	DS	DNA	enveloped	0	0	dsDNA	0	0	0	0.387936
Cercopithecine_herpesvirus_9	Herpesviridae	Herpesvirales	Varicellovirus	0	0	0	NA	NA	124784	1	1	FALSE	FALSE	N	DS	DNA	enveloped	0	0	dsDNA	0.648202	0.648202	0.648202	0.589478
Cervid_herpesvirus_1	Herpesviridae	Herpesvirales	Varicellovirus	0	0	0	NA	NA	125000	10	9	FALSE	FALSE	N	DS	DNA	enveloped	0	0	dsDNA	0.319539	0.274903	0.304102	0.754674
Cervid_herpesvirus_2	Herpesviridae	Herpesvirales	Varicellovirus	0	0	0	NA	NA	125000	10	10	FALSE	FALSE	N	DS	DNA	enveloped	0	0	dsDNA	0	0	0	0.748149
Cetacean_morbillivirus_virus	Paramyxoviridae	Mononegavirales	Morbillivirus	0	0	0	NA	NA	15702	0	0	TRUE	FALSE	N	SS	RNA	enveloped	0	0	ssRNA(-)	0.222752	0.123676	0.098487	0.762056
Chipmunk_parvovirus	Parvoviridae	Unassigned	Erythrovirus	0	0	0	NA	NA	NA	1	1	FALSE	FALSE	N	SS	DNA	non-enveloped	0	0	ssDNA(+/-)	0	0	0	0.788925
Classical_swine_fever_virus	Flaviviridae	Unassigned	Pestivirus	0	0	0	12183	12298	12240.5	1353	1164	TRUE	FALSE	N	SS	RNA	enveloped	0	0	ssRNA(+)	0	0	0	0.67177
Cottontail_rabbit_papillomavirus	Papillomaviridae	Unassigned	Kappapapillomavirus	0	0	0	NA	NA	7868	451	248	FALSE	FALSE	N	DS	DNA	non-enveloped	0	0	dsDNA	0	0	0	0.712002
Cowpox_virus	Poxviridae	Unassigned	Orthopoxvirus	0	1	1	225136	220915	223026	864	575	TRUE	FALSE	N	DS	DNA	enveloped	1	1	dsDNA	0.835917	0.505258	0.531732	0.83395
Cricetid_herpesvirus	Herpesviridae	Herpesvirales	Ictalurivirus	0	0	0	123913	124335	124194	1	1	FALSE	FALSE	N	DS	DNA	enveloped	0	0	dsDNA	0	0	0	0.808393
Cupixi_virus	Arenaviridae	Bunyavirales	Mammarenavirus	0	0	0	NA	NA	10438	1	1	TRUE	TRUE	N	SS	RNA	enveloped	0	0	ssRNA(+/-)	0	0	0	0.802303
Deer_adenovirus	Adenoviridae	Unassigned	Atadenovirus	0	0	0	NA	NA	30000	9	9	FALSE	FALSE	NA	DS	DNA	non-enveloped	0	0	dsDNA	0.208674	0.142009	0.205349	0.750341
Deer_papillomavirus	Papillomaviridae	Unassigned	Deltapapillomavirus	0	0	0	NA	NA	8374	5	12	FALSE	FALSE	N	DS	DNA	non-enveloped	0	0	dsDNA	0.0120035	0.0120035	0.0120035	0.743962
Dobrava-Belgrade_virus	Hantaviridae	Bunyavirales	Orthohantavirus	0	1	1	NA	NA	11851	26	22	TRUE	TRUE	N	SS	RNA	enveloped	1	1	ssRNA(-)	0.313151	0.313151	0.313151	0.699101
Duvenhage_virus	Rhabdoviridae	Mononegavirales	Lyssavirus	0	1	1	NA	NA	11976	41	25	TRUE	FALSE	NA	SS	RNA	enveloped	1	1	ssRNA(-)	0.755973	0.624279	0.706465	1.01033
Ectromelia_virus	Poxviridae	Unassigned	Orthopoxvirus	0	0	0	NA	NA	209771	345	476	TRUE	FALSE	N	DS	DNA	enveloped	0	0	dsDNA	0.538799	0.474863	0.531732	0.733956
El_Moro_Canyon_virus	Hantaviridae	Bunyavirales	Orthohantavirus	0	0	0	NA	NA	15450	5	4	TRUE	TRUE	N	SS	RNA	enveloped	0	0	ssRNA(-)	0	0	0	0.746277
Encephalomyocarditis_virus	Picornaviridae	Picornavirales	Cardiovirus	0	1	1	NA	NA	7835	3132	2423	TRUE	FALSE	N	SS	RNA	non-enveloped	1	1	ssRNA(+)	1.11638	0.686375	0.701881	0.962807
Equid_herpesvirus_1	Herpesviridae	Herpesvirales	Varicellovirus	0	0	0	NA	NA	142000	93	918	FALSE	FALSE	N	DS	DNA	enveloped	0	0	dsDNA	0.753226	0.590015	0.59333	0.810929
Equid_herpesvirus_2	Herpesviridae	Herpesvirales	Rhadinovirus	0	0	0	NA	NA	184000	9	16	FALSE	FALSE	N	DS	DNA	enveloped	0	0	dsDNA	0	0	0	0.636988
Equid_herpesvirus_3	Herpesviridae	Herpesvirales	Varicellovirus	0	0	0	NA	NA	148000	4	34	FALSE	FALSE	N	DS	DNA	enveloped	0	0	dsDNA	0	0	0	0.636988
Equid_herpesvirus_4	Herpesviridae	Herpesvirales	Varicellovirus	0	0	0	NA	NA	145597	28	81	FALSE	FALSE	N	DS	DNA	enveloped	0	0	dsDNA	0.0895852	0.0895852	0.0895852	0.636988
Equid_herpesvirus_5	Herpesviridae	Herpesvirales	Rhadinovirus	0	0	0	NA	NA	150000	7	8	FALSE	FALSE	N	DS	DNA	enveloped	0	0	dsDNA	0	0	0	0.636988
Equid_herpesvirus_7	Herpesviridae	Herpesvirales	Rhadinovirus	0	0	0	NA	NA	180000	2	2	FALSE	FALSE	N	DS	DNA	enveloped	0	0	dsDNA	0	0	0	0.626442
Equid_herpesvirus_8	Herpesviridae	Herpesvirales	Varicellovirus	0	0	0	NA	NA	149332	0	0	FALSE	FALSE	N	DS	DNA	enveloped	0	0	dsDNA	0	0	0	0.626442
Equid_herpesvirus_9	Herpesviridae	Herpesvirales	Varicellovirus	0	0	0	NA	NA	148371	3	2	FALSE	FALSE	N	DS	DNA	enveloped	0	0	dsDNA	0.518636	0.358357	0.406784	0.726661
Equine_adenovirus_A	Adenoviridae	Unassigned	Mastadenovirus	0	0	0	NA	NA	35500	56	1	FALSE	FALSE	N	DS	DNA	non-enveloped	0	0	dsDNA	0	0	0	0.636988
Equine_adenovirus_B	Adenoviridae	Unassigned	Mastadenovirus	0	0	0	NA	NA	35500	2	1	FALSE	FALSE	N	DS	DNA	non-enveloped	0	0	dsDNA	0	0	0	0.636988
Equine_arteritis_virus	Arteriviridae	Nidovirales	Arterivirus	0	0	0	NA	NA	12704	637	406	TRUE	FALSE	N	SS	RNA	enveloped	0	0	ssRNA(+)	0.0895852	0.0796504	0.0822157	0.636988
Equine_foamy_virus	Retroviridae	Ortervirales	Spumavirus	0	0	0	NA	NA	12035	4	5	FALSE	FALSE	N	SS	RNA	enveloped	0	0	ssRNA-RT	0	0	0	0.636988
Equine_papillomavirus_1	Papillomaviridae	Unassigned	Zetapapillomavirus	0	0	0	NA	NA	7613	1	1	FALSE	FALSE	N	DS	DNA	non-enveloped	0	0	dsDNA	0	0	0	0.636988
Equine_rhinitis_A_virus	Picornaviridae	Picornavirales	Aphthovirus	0	0	0	NA	NA	7734	30	28	TRUE	FALSE	N	SS	RNA	non-enveloped	0	0	ssRNA(+)	0.48557	0.48557	0.48557	0.766609
Equine_rhinitis_B_virus	Picornaviridae	Picornavirales	Erbovirus	0	0	0	NA	NA	8828	17	16	TRUE	FALSE	N	SS	RNA	non-enveloped	0	0	ssRNA(+)	0	0	0	0.636988
Equine_torovirus	Tobaniviridae	Nidovirales	Torovirus	0	0	0	NA	NA	28000	12	9	TRUE	FALSE	N	SS	RNA	enveloped	0	0	ssRNA(+)	0	0	0	0.636988
European_bat_lyssavirus_1	Rhabdoviridae	Mononegavirales	Lyssavirus	0	1	1	NA	NA	11966	48	15	TRUE	FALSE	N	SS	RNA	enveloped	1	1	ssRNA(-)	0.802136	0.536748	0.528991	1.01033
European_bat_lyssavirus_2	Rhabdoviridae	Mononegavirales	Lyssavirus	0	1	1	NA	NA	11966	48	15	TRUE	FALSE	N	SS	RNA	enveloped	1	1	ssRNA(-)	0.691746	0.483008	0.521602	0.975537
European_brown_hare_syndrome_virus	Caliciviridae	Unassigned	Lagovirus	0	0	0	NA	NA	7442	47	23	TRUE	FALSE	N	SS	RNA	non-enveloped	0	0	ssRNA(+)	0.119891	0.119891	0.119891	0.712984
European_elk_papillomavirus	Papillomaviridae	Unassigned	Deltapapillomavirus	0	0	0	NA	NA	8095	6	8	FALSE	FALSE	N	DS	DNA	non-enveloped	0	0	dsDNA	0	0	0	0.743159
Felid_herpesvirus_1	Herpesviridae	Herpesvirales	Varicellovirus	0	0	0	NA	NA	135797	25	22	FALSE	FALSE	N	DS	DNA	enveloped	0	0	dsDNA	0.462505	0.339862	0.367324	0.705307
Feline_astrovirus	Astroviridae	Unassigned	Mamastrovirus	0	0	0	6598	6795	6696.5	2	2	TRUE	FALSE	N	SS	RNA	non-enveloped	0	0	ssRNA(+)	0.15545	0.15545	0.15545	0.679985
Feline_calicivirus	Caliciviridae	Unassigned	Vesivirus	0	0	0	NA	NA	7683	889	513	TRUE	FALSE	N	SS	RNA	non-enveloped	0	0	ssRNA(+)	0.462505	0.233656	0.180134	0.705307
Feline_coronavirus	Coronaviridae	Nidovirales	Coronavirus	0	0	0	27000	33000	30000	436	322	TRUE	FALSE	N	SS	RNA	enveloped	0	0	ssRNA(+)	0.328259	0.211044	0.198358	0.705307
Feline_foamy_virus	Retroviridae	Ortervirales	Spumavirus	0	0	0	NA	NA	11700	55	51	FALSE	FALSE	N	SS	RNA	enveloped	0	0	ssRNA-RT	0.00901849	0.00901849	0.00901849	0.670752
Feline_immunodeficiency_virus	Retroviridae	Ortervirales	Lentivirus	0	0	0	NA	NA	9474	2392	1689	FALSE	FALSE	N	SS	RNA	enveloped	0	0	ssRNA-RT	0.335079	0.234003	0.217371	0.712128
Feline_leukemia_virus	Retroviridae	Ortervirales	Gammaretrovirus	0	0	0	NA	NA	8837	1251	1707	FALSE	FALSE	N	SS	RNA	enveloped	0	0	ssRNA-RT	0.172376	0.124451	0.136777	0.696024
Feline_panleukopenia_virus	Parvoviridae	Unassigned	Parvovirus	0	0	0	NA	NA	5323	521	332	FALSE	FALSE	N	SS	DNA	non-enveloped	0	0	ssDNA(+/-)	0.493591	0.375931	0.450325	0.773731
Feline_papillomavirus	Papillomaviridae	Unassigned	Lambdapapillomavirus	0	0	0	NA	NA	8300	3	2	FALSE	FALSE	N	DS	DNA	non-enveloped	0	0	dsDNA	0	0	0	0.669865
Flexal_virus	Arenaviridae	Bunyavirales	Arenavirus	0	1	1	NA	NA	10448	5	2	TRUE	TRUE	N	SS	RNA	enveloped	1	1	ssRNA(+/-)	0.303139	0.268379	0.275928	0.819167
Foot-and-mouth_disease_virus	Picornaviridae	Picornavirales	Aphthovirus	0	1	1	8115	8203	8159	4532	3351	TRUE	FALSE	N	SS	RNA	non-enveloped	1	0	ssRNA(+)	1.19557	0.381222	0.294519	1.07475
Gan_Gan_virus	Peribunyaviridae	Bunyavirales	Orthobunyavirus	0	1	0	NA	NA	12118	3	2	TRUE	TRUE	N	SS	RNA	enveloped	1	0	ssRNA(-)	0.743938	0.577733	0.635255	0.795322
GB_virus_A	Flaviviridae	Unassigned	Unassigned	0	0	0	NA	NA	9550	15	19	TRUE	FALSE	N	SS	RNA	enveloped	0	0	ssRNA(+)	0.341272	0.250373	0.292406	0.648798
GB_virus_B	Flaviviridae	Unassigned	Hepacivirus	0	0	0	NA	NA	9399	84	87	TRUE	FALSE	N	SS	RNA	enveloped	0	0	ssRNA(+)	0.323502	0.323502	0.323502	0.631028
GB_virus_C	Flaviviridae	Unassigned	Unassigned	0	1	1	NA	NA	9392	1019	856	TRUE	FALSE	N	SS	RNA	enveloped	1	0	ssRNA(+)	0	0	0	0.130389
Gibbon_ape_leukemia_virus	Retroviridae	Ortervirales	Gammaretrovirus	0	1	0	NA	NA	8088	234	275	FALSE	FALSE	N	SS	RNA	enveloped	1	0	ssRNA-RT	0	0	0	0.270839
Goat_adenovirus	Adenoviridae	Unassigned	Mastadenovirus	0	0	0	NA	NA	29576	5	1	FALSE	FALSE	N	DS	DNA	non-enveloped	0	0	dsDNA	0	0	0	0.687562
Goatpox_virus	Poxviridae	Unassigned	Capripoxvirus	0	0	0	NA	NA	149599	18	18	TRUE	FALSE	N	DS	DNA	enveloped	0	0	dsDNA	0	0	0	0.650447
Ground_squirrel_hepatitis_virus	Hepadnaviridae	Unassigned	Orthohepadnavirus	0	0	0	NA	NA	3311	37	52	FALSE	FALSE	N	DS	DNA	enveloped	0	0	dsDNA-RT	0.275745	0.275745	0.275745	0.844913
Guanarito_virus	Arenaviridae	Bunyavirales	Arenavirus	0	1	1	NA	NA	10424	60	23	TRUE	TRUE	N	SS	RNA	enveloped	1	1	ssRNA(+/-)	0.480691	0.403585	0.439645	0.858466
Guinea_pig_adenovirus	Adenoviridae	Unassigned	Mastadenovirus	0	0	0	NA	NA	35500	7	5	FALSE	FALSE	N	DS	DNA	non-enveloped	0	0	dsDNA	0	0	0	0.810929
Guinea_pig_type-C_oncovirus	Retroviridae	Ortervirales	Gammaretrovirus	0	0	0	NA	NA	8300	0	0	FALSE	FALSE	N	SS	RNA	enveloped	0	0	ssRNA-RT	0	0	0	0.810929
H-1_parvovirus	Parvoviridae	Unassigned	Parvovirus	0	0	0	NA	NA	5176	47	5	FALSE	FALSE	N	SS	DNA	non-enveloped	0	0	ssDNA(+/-)	0	0	0	0.662617
Hamster_oral_papillomavirus	Papillomaviridae	Unassigned	Pipapillomavirus	0	0	0	NA	NA	7393	3	2	FALSE	FALSE	N	DS	DNA	non-enveloped	0	0	dsDNA	0	0	0	0.808393
Hamster_parvovirus	Parvoviridae	Unassigned	Parvovirus	0	0	0	NA	NA	NA	5	5	FALSE	FALSE	N	SS	DNA	non-enveloped	0	0	ssDNA(+/-)	0	0	0	0.808393
Hamster_polyomavirus	Polyomaviridae	Unassigned	Polyomavirus	0	0	0	5031	5353	5192	43	40	TRUE	FALSE	N	DS	DNA	non-enveloped	0	0	dsDNA	0	0	0	0.808393
Hantaan_virus	Hantaviridae	Bunyavirales	Orthohantavirus	0	1	1	NA	NA	11845	985	611	TRUE	TRUE	N	SS	RNA	enveloped	1	1	ssRNA(-)	0.872881	0.600632	0.610449	0.912204
Hare_fibroma_virus	Poxviridae	Unassigned	Leporipoxvirus	0	0	0	NA	NA	159857	0	0	TRUE	FALSE	N	DS	DNA	enveloped	0	0	dsDNA	0.122354	0.122354	0.122354	0.712984
Hendra_virus	Paramyxoviridae	Mononegavirales	Henipavirus	0	1	1	NA	NA	18234	373	186	TRUE	FALSE	N	SS	RNA	enveloped	1	1	ssRNA(-)	0.452341	0.246085	0.246109	0.692547
Hepatitis_E_virus	Hepeviridae	Unassigned	Hepevirus	0	1	1	NA	NA	7176	2381	1874	TRUE	FALSE	N	SS	RNA	non-enveloped	1	1	ssRNA(+)	0.729587	0.517056	0.568469	0.77642
Hippotragine_herpesvirus_1	Herpesviridae	Herpesvirales	Rhadinovirus	0	0	0	NA	NA	180000	2	2	FALSE	FALSE	N	DS	DNA	enveloped	0	0	dsDNA	0	0	0	0.669816
Human_adenovirus_A	Adenoviridae	Unassigned	Mastadenovirus	0	1	1	NA	NA	34125	2391	4	FALSE	FALSE	N	DS	DNA	non-enveloped	1	1	dsDNA	0	0	0	0.130389
Human_adenovirus_B	Adenoviridae	Unassigned	Mastadenovirus	0	1	1	NA	NA	35514	17	6	FALSE	FALSE	N	DS	DNA	non-enveloped	1	1	dsDNA	0.146366	0.106859	0.138494	0.160127
Human_adenovirus_C	Adenoviridae	Unassigned	Mastadenovirus	0	1	1	NA	NA	35937	49	7	FALSE	FALSE	N	DS	DNA	non-enveloped	1	1	dsDNA	0.146366	0.106859	0.138494	0.160127
Human_adenovirus_E	Adenoviridae	Unassigned	Mastadenovirus	0	1	1	NA	NA	35994	5	2	FALSE	FALSE	N	DS	DNA	non-enveloped	1	1	dsDNA	0.0357172	0.0357172	0.0357172	0.130389
Human_adenovirus_F	Adenoviridae	Unassigned	Mastadenovirus	0	1	1	NA	NA	34214	8	1	FALSE	FALSE	N	DS	DNA	non-enveloped	1	1	dsDNA	0.146366	0.146366	0.146366	0.160127
Human_enterovirus_A	Picornaviridae	Picornavirales	Enterovirus	0	1	1	NA	NA	7413	35	362	TRUE	FALSE	N	SS	RNA	non-enveloped	1	1	ssRNA(+)	0.146366	0.146366	0.146366	0.160127
Human_enterovirus_B	Picornaviridae	Picornavirales	Enterovirus	0	1	1	NA	NA	7389	219	4096	TRUE	FALSE	N	SS	RNA	non-enveloped	1	1	ssRNA(+)	0.229905	0.229905	0.229905	0.419763
Human_enterovirus_D	Picornaviridae	Picornavirales	Enterovirus	0	1	1	NA	NA	7390	6	31	TRUE	FALSE	N	SS	RNA	non-enveloped	1	1	ssRNA(+)	0.415887	0.322409	0.404975	0.429648
Human_herpesvirus_5	Herpesviridae	Herpesvirales	Cytomegalovirus	0	1	1	NA	NA	235646	400	324	FALSE	FALSE	N	DS	DNA	enveloped	1	0	dsDNA	0	0	0	0.418922
Human_parainfluenza_virus_2	Paramyxoviridae	Mononegavirales	Rubulavirus	0	1	0	NA	NA	15646	67	241	TRUE	FALSE	N	SS	RNA	enveloped	1	0	ssRNA(-)	NA	NA	NA	0.549271
Human_T-lymphotropic_virus_1	Retroviridae	Ortervirales	Deltaretrovirus	0	1	0	NA	NA	9028	1	4	FALSE	FALSE	N	SS	RNA	enveloped	1	1	ssRNA-RT	0.648691	0.339752	0.257866	0.573865
Human_T-lymphotropic_virus_2	Retroviridae	Ortervirales	Deltaretrovirus	0	1	1	8507	9028	8767.5	2	2	FALSE	FALSE	N	SS	RNA	enveloped	1	1	ssRNA-RT	0	0	0	0.122517
Human_T-lymphotropic_virus_3	Retroviridae	Ortervirales	Deltaretrovirus	0	1	1	NA	NA	8918	1	17	FALSE	FALSE	N	SS	RNA	enveloped	1	1	ssRNA-RT	0.650936	0.450499	0.527639	0.573865
Influenza_A_H3N2_virus	Orthomyxoviridae	Articulavirales	Influenzavirus A	0	1	NA	NA	NA	NA	NA	6809	TRUE	TRUE	N	SS	RNA	enveloped	1	1	ssRNA(-)	NA	NA	NA	0.975537
Influenza_A_H5N1_virus	Orthomyxoviridae	Articulavirales	Influenzavirus A	0	1	NA	NA	NA	NA	NA	5874	TRUE	TRUE	N	SS	RNA	enveloped	1	1	ssRNA(-)	NA	NA	NA	0.777699
Influenza_C_virus	Orthomyxoviridae	Articulavirales	Influenzavirus C	0	1	1	NA	NA	12555	493	277	TRUE	TRUE	N	SS	RNA	enveloped	1	1	ssRNA(-)	0	0	0	0.67177
Ippy_virus	Arenaviridae	Bunyavirales	Mammarenavirus	0	0	0	NA	NA	10682	7	4	TRUE	TRUE	N	SS	RNA	enveloped	0	0	ssRNA(+/-)	0.337449	0.263443	0.275501	0.740487
Irkut_virus	Rhabdoviridae	Mononegavirales	Lyssavirus	0	0	0	NA	NA	11980	8	5	TRUE	FALSE	N	SS	RNA	enveloped	0	0	ssRNA(-)	0.6159	0.6159	0.6159	0.892782
Jaagsiekte_sheep_retrovirus	Retroviridae	Ortervirales	Betaretrovirus	0	0	0	NA	NA	7462	226	156	FALSE	FALSE	N	SS	RNA	enveloped	0	0	ssRNA-RT	0.12162	0.12162	0.12162	0.745671
Junin_virus	Arenaviridae	Bunyavirales	Arenavirus	0	1	1	NA	NA	10525	780	496	TRUE	TRUE	N	SS	RNA	enveloped	1	1	ssRNA(+/-)	0.84348	0.546828	0.480336	0.868494
Kasokero_virus	Nairoviridae	Bunyavirales	Orthonairovirus	0	1	1	NA	NA	6317	3	1	TRUE	TRUE	N	SS	RNA	enveloped	1	1	ssRNA(-)	0	0	0	0.705804
Keuraliba_virus	Rhabdoviridae	Mononegavirales	Ledantevirus	0	0	0	NA	NA	NA	1	1	FALSE	FALSE	N	SS	RNA	enveloped	0	0	ssRNA(-)	0	0	0	0.817795
Khabarovsk_virus	Hantaviridae	Bunyavirales	Orthohantavirus	0	0	0	12132	12132	12132	5	2	TRUE	TRUE	N	SS	RNA	enveloped	0	0	ssRNA(-)	0.130826	0.126291	0.124627	0.728242
Khujand_virus	Rhabdoviridae	Mononegavirales	Lyssavirus	0	0	0	NA	NA	11903	9	4	TRUE	FALSE	N	SS	RNA	enveloped	0	0	ssRNA(-)	0.637764	0.428435	0.631593	0.914647
Kilham_rat_virus	Parvoviridae	Unassigned	Parvovirus	0	0	0	4746	5176	4961.62	115	88	FALSE	FALSE	N	SS	DNA	non-enveloped	0	0	ssDNA(+/-)	0.165149	0.165149	0.165149	0.664981
Lactate_dehydrogenase-elevating_virus	Arteriviridae	Nidovirales	Arterivirus	0	0	0	NA	NA	14104	208	338	TRUE	FALSE	N	SS	RNA	enveloped	0	0	ssRNA(+)	0	0	0	0.726889
Lagos_bat_virus	Rhabdoviridae	Mononegavirales	Lyssavirus	0	0	0	NA	NA	12016	49	35	TRUE	FALSE	N	SS	RNA	enveloped	0	0	ssRNA(-)	0.316784	0.237233	0.29272	0.812792
Laguna_Negra_virus	Hantaviridae	Bunyavirales	Orthohantavirus	0	1	1	NA	NA	15450	15	8	TRUE	TRUE	N	SS	RNA	enveloped	1	1	ssRNA(-)	0.487402	0.406191	0.429367	0.868494
Lake_Victoria_marburgvirus	Filoviridae	Mononegavirales	Marburgvirus	0	1	1	NA	NA	19111	12	12	TRUE	FALSE	N	SS	RNA	enveloped	1	1	ssRNA(-)	0.816524	0.573384	0.574207	0.821778
Langur_virus	Retroviridae	Ortervirales	Betaretrovirus	0	0	0	NA	NA	9000	2	8	FALSE	FALSE	N	SS	RNA	enveloped	0	0	ssRNA-RT	NA	NA	NA	0.461939
Lapine_parvovirus	Parvoviridae	Unassigned	Parvovirus	0	0	0	NA	NA	NA	1	0	FALSE	FALSE	N	SS	DNA	non-enveloped	0	0	ssDNA(+/-)	0	0	0	0.722904
Lassa_virus	Arenaviridae	Bunyavirales	Arenavirus	0	1	1	NA	NA	10681	334	494	TRUE	TRUE	N	SS	RNA	enveloped	1	1	ssRNA(+/-)	0.783929	0.400651	0.35978	0.722125
Latino_virus	Arenaviridae	Bunyavirales	Arenavirus	0	0	0	NA	NA	10648	2	2	TRUE	TRUE	N	SS	RNA	enveloped	0	0	ssRNA(+/-)	0.614276	0.614276	0.614276	0.866937
Ljungan_virus	Picornaviridae	Picornavirales	Parechovirus	0	1	1	7590	7637	7613.5	60	41	TRUE	FALSE	N	SS	RNA	non-enveloped	1	0	ssRNA(+)	0.713752	0.463787	0.478376	0.80697
Lymphocytic_choriomeningitis_virus	Arenaviridae	Bunyavirales	Arenavirus	0	1	1	NA	NA	10056	2613	2619	TRUE	TRUE	N	SS	RNA	enveloped	1	1	ssRNA(+/-)	0.826952	0.499845	0.507256	0.845733
Macaque_simian_foamy_virus	Retroviridae	Ortervirales	Spumavirus	0	0	0	NA	NA	12972	1	1	FALSE	FALSE	N	SS	RNA	enveloped	0	0	ssRNA-RT	0	0	0	0.405899
Machupo_virus	Arenaviridae	Bunyavirales	Arenavirus	0	1	1	NA	NA	10635	58	70	TRUE	TRUE	N	SS	RNA	enveloped	1	1	ssRNA(+/-)	0.676184	0.676184	0.676184	0.866937
Macropodid_herpesvirus_1	Herpesviridae	Herpesvirales	Simplexvirus	0	0	0	NA	NA	140122	7	7	FALSE	FALSE	N	DS	DNA	enveloped	0	0	dsDNA	0.133738	0.133738	0.133738	0.781529
Macropodid_herpesvirus_2	Herpesviridae	Herpesvirales	Simplexvirus	0	0	0	NA	NA	135000	3	4	FALSE	FALSE	N	DS	DNA	enveloped	0	0	dsDNA	NA	NA	NA	0.792957
Mammalian_orthoreovirus	Reoviridae	Unassigned	Orthoreovirus	0	0	0	NA	NA	23540	496	589	TRUE	TRUE	N	DS	RNA	non-enveloped	0	0	dsRNA	0.847051	0.795557	0.803777	0.77642
Mapuera_virus	Paramyxoviridae	Mononegavirales	Rubulavirus	0	0	0	NA	NA	15486	5	6	TRUE	FALSE	N	SS	RNA	enveloped	0	0	ssRNA(-)	0	0	0	0.736769
Marmodid_herpesvirus_1	Herpesviridae	Herpesvirales	Rhadinovirus	0	0	0	NA	NA	180000	1	1	FALSE	FALSE	N	DS	DNA	enveloped	0	0	dsDNA	0	0	0	0.806311
Mason-Pfizer_monkey_virus	Retroviridae	Ortervirales	Betaretrovirus	0	0	0	NA	NA	8557	250	347	FALSE	FALSE	N	SS	RNA	enveloped	0	0	ssRNA-RT	0.910778	0.910778	0.910778	0.866937
Mastomys_natalensis_papillomavirus	Papillomaviridae	Unassigned	Iotapapillomavirus	0	0	0	NA	NA	7687	15	7	FALSE	FALSE	N	DS	DNA	non-enveloped	0	0	dsDNA	0	0	0	0.712745
Menangle_virus	Paramyxoviridae	Mononegavirales	Rubulavirus	0	1	1	NA	NA	15516	33	26	TRUE	FALSE	N	SS	RNA	enveloped	1	1	ssRNA(-)	0.487124	0.272825	0.179343	0.692547
Middle_eastern_respiratory_syndrome_coronavirus	Coronaviridae	Nidovirales	Betacoronavirus	0	1	1	NA	NA	30063	NA	79	TRUE	FALSE	N	SS	RNA	enveloped	1	1	ssRNA(+)	NA	NA	NA	0.766609
Mink_astrovirus	Astroviridae	Unassigned	Mamastrovirus	0	0	0	NA	NA	6610	5	5	TRUE	FALSE	N	SS	RNA	non-enveloped	0	0	ssRNA(+)	0	0	0	0.712654
Mink_calicivirus	Caliciviridae	Unassigned	Vesivirus	0	0	0	NA	NA	8427	3	3	TRUE	FALSE	N	SS	RNA	non-enveloped	0	0	ssRNA(+)	0	0	0	0.712654
Mink_enteric_sapovirus	Caliciviridae	Unassigned	Sapovirus	0	0	0	NA	NA	7800	0	0	TRUE	FALSE	N	SS	RNA	non-enveloped	0	0	ssRNA(+)	0	0	0	0.712654
Minute_virus_of_mice	Parvoviridae	Unassigned	Parvovirus	0	0	0	NA	NA	5149	414	490	FALSE	FALSE	N	SS	DNA	non-enveloped	0	0	ssDNA(+/-)	0.745448	0.745448	0.745448	0.845733
Mobala_virus	Arenaviridae	Bunyavirales	Arenavirus	0	0	0	NA	NA	10705	6	5	TRUE	TRUE	N	SS	RNA	enveloped	0	0	ssRNA(+/-)	0.602204	0.46804	0.57902	0.808393
Mokola_virus	Rhabdoviridae	Mononegavirales	Lyssavirus	0	1	0	NA	NA	11940	NA	85	TRUE	FALSE	N	SS	RNA	enveloped	0	0	ssRNA(-)	NA	NA	NA	0.849242
Moloney_murine_sarcoma_virus	Retroviridae	Ortervirales	Gammaretrovirus	0	0	0	NA	NA	5833	229	522	FALSE	FALSE	N	SS	RNA	enveloped	0	0	ssRNA-RT	0	0	0	0.726889
Monkeypox_virus	Poxviridae	Unassigned	Orthopoxvirus	0	1	1	NA	NA	196858	234	357	TRUE	FALSE	N	DS	DNA	enveloped	1	1	dsDNA	0.727787	0.62606	0.684822	0.794646
Mopeia_virus	Arenaviridae	Bunyavirales	Arenavirus	0	0	0	NA	NA	10698	15	19	TRUE	TRUE	NA	SS	RNA	enveloped	0	0	ssRNA(+/-)	0.477547	0.364582	0.476712	0.712745
Mount_Elgon_bat_virus	Rhabdoviridae	Mononegavirales	Vesiculovirus	0	0	0	NA	NA	11049	8	8	TRUE	FALSE	N	SS	RNA	enveloped	0	0	ssRNA(-)	0.100377	0.100377	0.100377	0.699328
Mouse_mammary_tumor_virus	Retroviridae	Ortervirales	Betaretrovirus	0	0	0	NA	NA	8805	2050	3910	FALSE	FALSE	NA	SS	RNA	enveloped	0	0	ssRNA-RT	0	0	0	0.726889
Mouse_parvovirus_1	Parvoviridae	Unassigned	Parvovirus	0	0	0	NA	NA	5144	13	10	FALSE	FALSE	N	SS	DNA	non-enveloped	0	0	ssDNA(+/-)	0	0	0	0.726889
Murid_herpesvirus_1	Herpesviridae	Herpesvirales	Muromegalovirus	0	0	0	NA	NA	235000	1	1	FALSE	FALSE	N	DS	DNA	enveloped	0	0	dsDNA	0.754301	0.495442	0.522919	0.845733
Murid_herpesvirus_2	Herpesviridae	Herpesvirales	Muromegalovirus	0	0	0	NA	NA	230138	0	0	FALSE	FALSE	N	DS	DNA	enveloped	0	0	dsDNA	0.420363	0.256738	0.206841	0.733956
Murid_herpesvirus_3	Herpesviridae	Herpesvirales	Ictalurivirus	0	0	0	NA	NA	134000	1	6	FALSE	FALSE	N	DS	DNA	enveloped	0	0	dsDNA	0	0	0	0.726889
Murid_herpesvirus_4	Herpesviridae	Herpesvirales	Rhadinovirus	0	0	0	NA	NA	135000	48	48	FALSE	FALSE	N	DS	DNA	enveloped	0	0	dsDNA	0.538799	0.39283	0.420612	0.733956
Murid_herpesvirus_5	Herpesviridae	Herpesvirales	Ictalurivirus	0	0	0	NA	NA	134000	1	1	FALSE	FALSE	N	DS	DNA	enveloped	0	0	dsDNA	0	0	0	0.733146
Murine_adenovirus_A	Adenoviridae	Unassigned	Mastadenovirus	0	0	0	NA	NA	30944	1	1	FALSE	FALSE	N	DS	DNA	non-enveloped	0	0	dsDNA	0	0	0	0.726889
Murine_adenovirus_B	Adenoviridae	Unassigned	Mastadenovirus	0	0	0	NA	NA	35500	1	1	FALSE	FALSE	N	DS	DNA	non-enveloped	0	0	dsDNA	0	0	0	0.726889
Murine_hepatitis_virus	Coronaviridae	Nidovirales	Coronavirus	0	0	0	NA	NA	31526	262	1950	TRUE	FALSE	N	SS	RNA	enveloped	0	0	ssRNA(+)	0	0	0	0.726889
Murine_leukemia_virus	Retroviridae	Ortervirales	Gammaretrovirus	0	0	0	NA	NA	5894	6376	12242	FALSE	FALSE	N	SS	RNA	enveloped	0	0	ssRNA-RT	0.21189	0.16513	0.206984	0.726889
Murine_norovirus_1	Caliciviridae	Unassigned	Norovirus	0	0	0	NA	NA	7382	94	57	TRUE	FALSE	N	SS	RNA	non-enveloped	0	0	ssRNA(+)	0.354059	0.354059	0.354059	0.733956
Murine_pneumonia_virus	Paramyxoviridae	Mononegavirales	Pneumovirus	0	1	0	NA	NA	14885	4	54	TRUE	FALSE	N	SS	RNA	enveloped	1	0	ssRNA(-)	0.829488	0.568061	0.613915	0.845733
Murine_pneumotropic_virus	Polyomaviridae	Unassigned	Polyomavirus	0	0	0	NA	NA	4754	7	6	FALSE	FALSE	N	DS	DNA	non-enveloped	0	0	dsDNA	0.369241	0.369241	0.369241	0.726889
Murine_polyomavirus	Polyomaviridae	Unassigned	Polyomavirus	0	0	0	NA	NA	5297	151	101	FALSE	FALSE	N	DS	DNA	non-enveloped	0	0	dsDNA	0	0	0	0.726889
Mustelid_herpesvirus_1	Herpesviridae	Herpesvirales	Rhadinovirus	0	0	0	NA	NA	180000	4	3	FALSE	FALSE	N	DS	DNA	enveloped	0	0	dsDNA	0.26882	0.26882	0.26882	0.705465
Myxoma_virus	Poxviridae	Unassigned	Leporipoxvirus	0	0	0	NA	NA	161773	548	424	TRUE	FALSE	N	DS	DNA	enveloped	0	0	dsDNA	NA	NA	NA	0.730214
Nariva_virus	Paramyxoviridae	Mononegavirales	Unassigned	0	0	0	NA	NA	15276	9	8	TRUE	FALSE	N	SS	RNA	enveloped	0	0	ssRNA(-)	0	0	0	0.858466
Nelson_Bay_orthoreovirus	Reoviridae	Unassigned	Orthoreovirus	0	0	0	NA	NA	23500	3	3	TRUE	TRUE	N	DS	RNA	non-enveloped	0	0	dsRNA	0.271123	0.271123	0.271123	0.715977
New_York_virus	Hantaviridae	Bunyavirales	Orthohantavirus	0	1	1	NA	NA	15450	9	4	TRUE	TRUE	N	SS	RNA	enveloped	1	1	ssRNA(-)	0	0	0	0.704613
Nipah_virus	Paramyxoviridae	Mononegavirales	Henipavirus	0	1	1	NA	NA	18246	516	374	TRUE	FALSE	N	SS	RNA	enveloped	1	1	ssRNA(-)	0.843489	0.437439	0.432862	0.890322
Norwalk_virus	Caliciviridae	Unassigned	Norovirus	0	1	1	NA	NA	7654	773	787	TRUE	FALSE	N	SS	RNA	non-enveloped	1	0	ssRNA(+)	0	0	0	0.67177
Oita_virus	Rhabdoviridae	Mononegavirales	Unassigned	0	0	0	NA	NA	NA	4	1	TRUE	FALSE	NA	SS	RNA	enveloped	0	0	ssRNA(-)	0	0	0	0.677641
Oliveros_virus	Arenaviridae	Bunyavirales	Arenavirus	0	0	0	NA	NA	10719	8	5	TRUE	TRUE	N	SS	RNA	enveloped	0	0	ssRNA(+/-)	NA	NA	NA	0.855656
Orf_virus	Poxviridae	Unassigned	Parapoxvirus	0	1	1	NA	NA	139962	334	311	TRUE	FALSE	N	DS	DNA	enveloped	1	1	dsDNA	0.371123	0.241168	0.250265	0.748149
Ovine_adenovirus_A	Adenoviridae	Unassigned	Mastadenovirus	0	0	0	NA	NA	33034	90	1	FALSE	FALSE	N	DS	DNA	non-enveloped	0	0	dsDNA	0	0	0	0.710245
Ovine_adenovirus_D	Adenoviridae	Unassigned	Atadenovirus	0	0	0	NA	NA	29576	1	1	FALSE	FALSE	N	DS	DNA	non-enveloped	0	0	dsDNA	0	0	0	0.745671
Ovine_astrovirus	Astroviridae	Unassigned	Mamastrovirus	0	0	0	NA	NA	6440	4	5	TRUE	FALSE	N	SS	RNA	non-enveloped	0	0	ssRNA(+)	0	0	0	0.745671
Ovine_herpesvirus_2	Herpesviridae	Herpesvirales	Rhadinovirus	0	0	0	NA	NA	135135	136	101	FALSE	FALSE	N	DS	DNA	enveloped	0	0	dsDNA	0.439547	0.27201	0.282994	0.754674
Ovine_papillomavirus_1	Papillomaviridae	Unassigned	Deltapapillomavirus	0	0	0	NA	NA	7761	1	1	FALSE	FALSE	N	DS	DNA	non-enveloped	0	0	dsDNA	0	0	0	0.745671
Pampa_virus	Arenaviridae	Bunyavirales	Arenavirus	0	0	0	NA	NA	7400	1	1	TRUE	TRUE	N	SS	RNA	enveloped	0	0	ssRNA(+/-)	0	0	0	0.872667
Parainfluenza_virus_5	Paramyxoviridae	Mononegavirales	Rubulavirus	0	1	1	NA	NA	15246	55	91	TRUE	FALSE	NA	SS	RNA	enveloped	1	0	ssRNA(-)	0.0923359	0.0923359	0.0923359	0.405899
Parana_virus	Arenaviridae	Bunyavirales	Arenavirus	0	0	0	NA	NA	10494	2	4	TRUE	TRUE	N	SS	RNA	enveloped	0	0	ssRNA(+/-)	0	0	0	0.815507
Parapoxvirus_of_red_deer_in_New_Zealand	Poxviridae	Unassigned	Parapoxvirus	0	0	0	NA	NA	139981	4	4	TRUE	FALSE	N	DS	DNA	enveloped	0	0	dsDNA	0	0	0	0.750341
Peste-des-petits-ruminants_virus	Paramyxoviridae	Mononegavirales	Morbillivirus	0	0	0	NA	NA	15948	305	260	TRUE	FALSE	N	SS	RNA	enveloped	0	0	ssRNA(-)	0.557696	0.284664	0.251371	0.766609
Phnom_Penh_bat_virus	Flaviviridae	Unassigned	Flavivirus	0	0	0	NA	NA	10131	3	2	TRUE	FALSE	N	SS	RNA	enveloped	0	0	ssRNA(+)	0.301661	0.301661	0.301661	0.679287
Phocid_herpesvirus_1	Herpesviridae	Herpesvirales	Varicellovirus	0	0	0	NA	NA	125000	13	13	FALSE	FALSE	N	DS	DNA	enveloped	0	0	dsDNA	0.18636	0.148803	0.152459	0.665017
Phocine_distemper_virus	Paramyxoviridae	Mononegavirales	Morbillivirus	0	0	0	NA	NA	15696	150	140	TRUE	FALSE	N	SS	RNA	enveloped	0	0	ssRNA(-)	0.128096	0.106646	0.114585	0.665017
Pichinde_virus	Arenaviridae	Bunyavirales	Arenavirus	0	1	0	NA	NA	10416	144	157	TRUE	TRUE	N	SS	RNA	enveloped	1	0	ssRNA(+/-)	0.510378	0.510378	0.510378	0.819167
Pig-tailed_macaque_parvovirus	Parvoviridae	Unassigned	Erythrovirus	0	0	0	NA	NA	NA	0	0	FALSE	FALSE	N	SS	DNA	non-enveloped	0	0	ssDNA(+/-)	0	0	0	0.40282
Pirital_virus	Arenaviridae	Bunyavirales	Arenavirus	0	0	0	NA	NA	10482	15	11	TRUE	TRUE	N	SS	RNA	enveloped	0	0	ssRNA(+/-)	0.469517	0.469517	0.469517	0.858466
Pongine_herpesvirus_1	Herpesviridae	Herpesvirales	Lymphocryptovirus	0	0	0	NA	NA	170000	0	0	FALSE	FALSE	N	DS	DNA	enveloped	0	0	dsDNA	0	0	0	0.414726
Pongine_herpesvirus_2	Herpesviridae	Herpesvirales	Lymphocryptovirus	0	0	0	NA	NA	180000	0	0	FALSE	FALSE	N	DS	DNA	enveloped	0	0	dsDNA	0	0	0	0.228121
Pongine_herpesvirus_3	Herpesviridae	Herpesvirales	Lymphocryptovirus	0	0	0	NA	NA	180000	0	0	FALSE	FALSE	N	DS	DNA	enveloped	0	0	dsDNA	0	0	0	0.160127
Pongine_herpesvirus_4	Herpesviridae	Herpesvirales	Cytomegalovirus	0	0	0	NA	NA	241087	0	0	FALSE	FALSE	N	DS	DNA	enveloped	0	0	dsDNA	0	0	0	0.130389
Porcine_adenovirus_A	Adenoviridae	Unassigned	Mastadenovirus	0	0	0	NA	NA	34094	104	1	FALSE	FALSE	NA	DS	DNA	non-enveloped	0	0	dsDNA	0	0	0	0.67177
Porcine_adenovirus_B	Adenoviridae	Unassigned	Mastadenovirus	0	0	0	NA	NA	35500	1	1	FALSE	FALSE	NA	DS	DNA	non-enveloped	0	0	dsDNA	0	0	0	0.67177
Porcine_adenovirus_C	Adenoviridae	Unassigned	Mastadenovirus	0	0	0	NA	NA	32621	1	1	FALSE	FALSE	NA	DS	DNA	non-enveloped	0	0	dsDNA	0	0	0	0.67177
Porcine_astrovirus	Astroviridae	Unassigned	Mamastrovirus	0	0	0	6318	6500	6479.25	6	9	TRUE	FALSE	NA	SS	RNA	non-enveloped	0	0	ssRNA(+)	0	0	0	0.67177
Porcine_circovirus-1	Circoviridae	Unassigned	Circovirus	0	0	0	NA	NA	1758	11	11	FALSE	FALSE	N	SS	DNA	non-enveloped	0	0	ssDNA(+/-)	0	0	0	0.67177
Porcine_circovirus-2	Circoviridae	Unassigned	Circovirus	0	0	0	NA	NA	1768	184	156	FALSE	FALSE	N	SS	DNA	non-enveloped	0	0	ssDNA(+/-)	0	0	0	0.67177
Porcine_enteric_sapovirus	Caliciviridae	Unassigned	Sapovirus	0	0	0	NA	NA	7342	2	1	TRUE	FALSE	N	SS	RNA	non-enveloped	0	0	ssRNA(+)	0	0	0	0.67177
Porcine_enterovirus_A	Picornaviridae	Picornavirales	Enterovirus	0	0	0	7491	7572	7531.5	1	1	TRUE	FALSE	N	SS	RNA	non-enveloped	0	0	ssRNA(+)	0	0	0	0.67177
Porcine_enterovirus_B	Picornaviridae	Picornavirales	Enterovirus	0	0	0	7388	7393	7390.5	5	5	TRUE	FALSE	N	SS	RNA	non-enveloped	0	0	ssRNA(+)	0	0	0	0.67177
Porcine_epidemic_diarrhea_virus	Coronaviridae	Nidovirales	Alphacoronavirus	0	0	0	NA	NA	28033	105	108	TRUE	FALSE	N	SS	RNA	enveloped	0	0	ssRNA(+)	0	0	0	0.67177
Porcine_hemagglutinating_encephalomyelitis_virus	Coronaviridae	Nidovirales	Coronavirus	0	0	0	NA	NA	30480	14	18	TRUE	FALSE	N	SS	RNA	enveloped	0	0	ssRNA(+)	0	0	0	0.67177
Porcine_parvovirus	Parvoviridae	Unassigned	Parvovirus	0	0	0	5516	5805	5660.5	551	478	FALSE	FALSE	N	SS	DNA	non-enveloped	0	0	ssDNA(+/-)	0	0	0	0.67177
Porcine_reproductive_and_respiratory_syndrome_virus	Arteriviridae	Nidovirales	Arterivirus	0	0	0	15347	15352	15349.5	1651	1249	TRUE	FALSE	N	SS	RNA	enveloped	0	0	ssRNA(+)	0	0	0	0.67177
Porcine_rubulavirus	Paramyxoviridae	Mononegavirales	Rubulavirus	0	0	0	NA	NA	15180	35	30	TRUE	FALSE	N	SS	RNA	enveloped	0	0	ssRNA(-)	0.645365	0.645365	0.645365	0.850787
Porcine_teschovirus	Picornaviridae	Picornavirales	Teschovirus	0	0	0	NA	NA	7117	51	44	TRUE	FALSE	N	SS	RNA	non-enveloped	0	0	ssRNA(+)	0	0	0	0.67177
Porcine_torovirus	Coronaviridae	Nidovirales	Torovirus	0	0	0	NA	NA	28301	11	11	TRUE	FALSE	N	SS	RNA	enveloped	0	0	ssRNA(+)	0	0	0	0.67177
Porcine_type-C_oncovirus	Retroviridae	Ortervirales	Gammaretrovirus	0	0	0	NA	NA	8300	0	0	FALSE	FALSE	N	SS	RNA	enveloped	0	0	ssRNA-RT	0	0	0	0.67177
Possum_adenovirus	Adenoviridae	Unassigned	Atadenovirus	0	0	0	NA	NA	30000	3	3	FALSE	FALSE	N	DS	DNA	non-enveloped	0	0	dsDNA	0	0	0	0.785816
Prospect_Hill_virus	Hantaviridae	Bunyavirales	Orthohantavirus	0	0	0	NA	NA	11941	65	31	TRUE	TRUE	N	SS	RNA	enveloped	0	0	ssRNA(-)	0.452937	0.332017	0.359995	0.740291
Pseudocowpox_virus	Poxviridae	Unassigned	Parapoxvirus	0	1	1	133169	145289	139229	54	46	TRUE	FALSE	N	DS	DNA	enveloped	1	1	dsDNA	0	0	0	0.682652
Puma_lentivirus	Retroviridae	Ortervirales	Lentivirus	0	0	0	NA	NA	9750	21	20	FALSE	FALSE	N	SS	RNA	enveloped	0	0	ssRNA-RT	NA	NA	NA	0.699963
Puumala_virus	Hantaviridae	Bunyavirales	Orthohantavirus	0	1	1	NA	NA	12062	395	409	TRUE	TRUE	N	SS	RNA	enveloped	1	1	ssRNA(-)	0.613141	0.384082	0.393935	0.708417
Rabbit_coronavirus	Coronaviridae	Nidovirales	Coronavirus	0	0	0	30904	31116	31010	5	7	TRUE	FALSE	N	SS	RNA	enveloped	0	0	ssRNA(+)	0	0	0	0.722904
Rabbit_fibroma_virus	Poxviridae	Unassigned	Leporipoxvirus	0	0	0	NA	NA	159857	59	134	TRUE	FALSE	N	DS	DNA	enveloped	0	0	dsDNA	0	0	0	0.722904
Rabbit_hemorrhagic_disease_virus	Caliciviridae	Unassigned	Lagovirus	0	0	0	NA	NA	7437	132	291	TRUE	FALSE	N	SS	RNA	non-enveloped	0	0	ssRNA(+)	0.665561	0.544447	0.636108	0.733956
Rabbit_kidney_vacuolating_virus	Polyomaviridae	Unassigned	Polyomavirus	0	0	0	NA	NA	5000	5	7	FALSE	FALSE	N	DS	DNA	non-enveloped	0	0	dsDNA	0	0	0	0.712002
Rabbit_oral_papillomavirus	Papillomaviridae	Unassigned	Kappapapillomavirus	0	0	0	NA	NA	7565	11	13	FALSE	FALSE	N	DS	DNA	non-enveloped	0	0	dsDNA	0	0	0	0.722904
Rabies_virus	Rhabdoviridae	Mononegavirales	Lyssavirus	0	1	1	NA	NA	11932	2953	4483	TRUE	FALSE	N	SS	RNA	enveloped	1	1	ssRNA(-)	1.24226	0.633094	0.642097	1.08869
Racoonpox_virus	Poxviridae	Unassigned	Orthopoxvirus	0	0	0	NA	NA	210000	1	0	TRUE	FALSE	N	DS	DNA	enveloped	0	0	dsDNA	0.478224	0.478224	0.478224	0.753361
Rat_coronavirus	Coronaviridae	Nidovirales	Coronavirus	0	0	0	NA	NA	31250	32	56	TRUE	FALSE	N	SS	RNA	enveloped	0	0	ssRNA(+)	0	0	0	0.662617
Rat_minute_virus_1	Parvoviridae	Unassigned	Parvovirus	0	0	0	NA	NA	NA	1	1	FALSE	FALSE	N	SS	DNA	non-enveloped	0	0	ssDNA(+/-)	0	0	0	0.662617
Rat_parvovirus_1	Parvoviridae	Unassigned	Parvovirus	0	0	0	NA	NA	4759	1	1	FALSE	FALSE	N	SS	DNA	non-enveloped	0	0	ssDNA(+/-)	0	0	0	0.662617
Reston_ebolavirus	Filoviridae	Mononegavirales	Ebolavirus	0	1	1	18836	18895	18865.5	25	24	TRUE	FALSE	N	SS	RNA	enveloped	1	1	ssRNA(-)	0.777781	0.576897	0.622064	0.715977
Rhesus_macaque_parvovirus	Parvoviridae	Unassigned	Erythrovirus	0	0	0	NA	NA	NA	0	0	FALSE	FALSE	N	SS	DNA	non-enveloped	0	0	ssDNA(+/-)	0	0	0	0.387936
Rhesus_monkey_papillomavirus_1	Papillomaviridae	Unassigned	Alphapapillomavirus	0	0	0	NA	NA	8028	0	0	FALSE	FALSE	N	DS	DNA	non-enveloped	0	0	dsDNA	0.0923359	0.0923359	0.0923359	0.405899
Rinderpest_virus	Paramyxoviridae	Mononegavirales	Morbillivirus	0	0	0	NA	NA	15882	548	627	TRUE	FALSE	N	SS	RNA	enveloped	0	0	ssRNA(-)	0.349636	0.238673	0.238705	0.745671
Rio_Mamore_virus	Hantaviridae	Bunyavirales	Orthohantavirus	0	1	1	NA	NA	12183	12	12	TRUE	TRUE	N	SS	RNA	enveloped	1	1	ssRNA(-)	0.299303	0.254828	0.289143	0.830221
Rio_Segundo_virus	Hantaviridae	Bunyavirales	Orthohantavirus	0	0	0	NA	NA	15450	0	0	TRUE	TRUE	N	SS	RNA	enveloped	0	0	ssRNA(-)	0.305378	0.305378	0.305378	0.726567
Rotavirus_A	Reoviridae	Unassigned	Rotavirus	0	1	1	528	3267	18562	9291	62	TRUE	TRUE	N	DS	RNA	non-enveloped	1	1	dsRNA	0.762904	0.569056	0.536303	0.757224
Rotavirus_B	Reoviridae	Unassigned	Rotavirus	0	1	1	16500	21000	18750	5	34	TRUE	TRUE	N	DS	RNA	non-enveloped	1	1	dsRNA	0.430543	0.367898	0.367525	0.745671
Rotavirus_C	Reoviridae	Unassigned	Rotavirus	0	1	1	613	3309	17910	7	5	TRUE	TRUE	N	DS	RNA	non-enveloped	1	1	dsRNA	0.367525	0.367525	0.367525	0.682652
Rotavirus_E	Reoviridae	Unassigned	Rotavirus	0	0	0	16500	21000	18750	6	4	TRUE	TRUE	N	DS	RNA	non-enveloped	0	0	dsRNA	0	0	0	0.67177
Saimiriine_herpesvirus_1	Herpesviridae	Herpesvirales	Simplexvirus	0	0	0	NA	NA	156742	3	3	FALSE	FALSE	N	DS	DNA	enveloped	0	0	dsDNA	0	0	0	0.613822
Saimiriine_herpesvirus_2	Herpesviridae	Herpesvirales	Rhadinovirus	0	0	0	NA	NA	112930	10	493	FALSE	FALSE	N	DS	DNA	enveloped	0	0	dsDNA	0	0	0	0.613822
Salem_virus	Paramyxoviridae	Mononegavirales	Unassigned	0	0	0	NA	NA	16698	4	4	TRUE	FALSE	N	SS	RNA	enveloped	0	0	ssRNA(-)	0	0	0	0.636988
Sciurid_herpesvirus_1	Herpesviridae	Herpesvirales	Ictalurivirus	0	0	0	NA	NA	134000	1	1	FALSE	FALSE	N	DS	DNA	enveloped	0	0	dsDNA	0	0	0	0.82741
Sciurid_herpesvirus_2	Herpesviridae	Herpesvirales	Ictalurivirus	0	0	0	NA	NA	134000	1	1	FALSE	FALSE	N	DS	DNA	enveloped	0	0	dsDNA	0	0	0	0.82741
Sealpox_virus	Poxviridae	Unassigned	Parapoxvirus	0	1	1	NA	NA	140000	7	4	TRUE	FALSE	N	DS	DNA	enveloped	1	1	dsDNA	0	0	0	0.665017
Sendai_virus	Paramyxoviridae	Mononegavirales	Respirovirus	0	0	0	NA	NA	15384	3406	3250	TRUE	FALSE	N	SS	RNA	enveloped	0	0	ssRNA(-)	0.937891	0.63211	0.641033	0.845733
Seoul_virus	Hantaviridae	Bunyavirales	Orthohantavirus	0	1	1	NA	NA	11950	141	141	TRUE	TRUE	N	SS	RNA	enveloped	1	1	ssRNA(-)	0.464917	0.250866	0.170125	0.707627
Severe_acute_respiratory_syndrome-related_coronavirus	Coronaviridae	Nidovirales	Betacoronavirus	0	1	1	NA	NA	29751	5	6	TRUE	FALSE	N	SS	RNA	enveloped	1	1	ssRNA(+)	0.596008	0.340551	0.446233	0.757224
Sheeppox_virus	Poxviridae	Unassigned	Capripoxvirus	0	0	0	NA	NA	149955	24	24	TRUE	FALSE	N	DS	DNA	enveloped	0	0	dsDNA	0.12162	0.12162	0.12162	0.745671
Simian_adenovirus	Adenoviridae	Unassigned	Mastadenovirus	0	0	0	34450	34510	34480	155	194	FALSE	FALSE	N	DS	DNA	non-enveloped	0	0	dsDNA	0.374176	0.374176	0.374176	0.387936
Simian_enterovirus_A	Picornaviridae	Picornavirales	Enterovirus	0	0	0	NA	NA	7374	0	0	TRUE	FALSE	N	SS	RNA	non-enveloped	0	0	ssRNA(+)	0.400966	0.291822	0.314408	0.414726
Simian_foamy_virus	Retroviridae	Ortervirales	Spumavirus	0	1	1	NA	NA	13246	151	144	FALSE	FALSE	N	SS	RNA	enveloped	1	1	ssRNA-RT	0.899616	0.429335	0.393094	0.786835
Simian_hemorrhagic_fever_virus	Arteriviridae	Nidovirales	Arterivirus	0	0	0	15204	15717	15460.5	32	35	TRUE	FALSE	N	SS	RNA	enveloped	0	0	ssRNA(+)	0.663784	0.538866	0.633319	0.589478
Simian_immunodeficiency_virus	Retroviridae	Ortervirales	Lentivirus	0	0	0	NA	NA	9623	4718	5546	FALSE	FALSE	N	SS	RNA	enveloped	0	0	ssRNA-RT	0.686645	0.408027	0.39968	0.573865
Simian_parvovirus	Parvoviridae	Unassigned	Erythrovirus	0	1	0	NA	NA	NA	30	13	FALSE	FALSE	N	SS	DNA	non-enveloped	1	0	ssDNA(+/-)	0	0	0	0.405899
Simian_virus_10	Paramyxoviridae	Mononegavirales	Respirovirus	0	1	0	NA	NA	15000	4	1	TRUE	FALSE	N	SS	RNA	enveloped	1	0	ssRNA(-)	NA	NA	NA	0.810929
Simian_virus_12	Polyomaviridae	Unassigned	Polyomavirus	0	0	0	NA	NA	5206	1	1	FALSE	FALSE	NA	DS	DNA	non-enveloped	0	0	dsDNA	0	0	0	0.418922
Simian_virus_40	Polyomaviridae	Unassigned	Polyomavirus	0	1	1	NA	NA	5243	7091	13452	FALSE	FALSE	NA	DS	DNA	non-enveloped	1	0	dsDNA	0.127688	0.127688	0.127688	0.387936
Simian_virus_5	Paramyxoviridae	Mononegavirales	Rubulavirus	0	0	0	NA	NA	15246	275	233	TRUE	FALSE	NA	SS	RNA	enveloped	0	0	ssRNA(-)	0.363032	0.261722	0.330629	0.461939
Sin_Nombre_virus	Hantaviridae	Bunyavirales	Orthohantavirus	0	1	1	NA	NA	12317	366	240	TRUE	TRUE	N	SS	RNA	enveloped	1	1	ssRNA(-)	0.950161	0.457959	0.437951	0.89579
Sosuga_virus	Paramyxoviridae	Mononegavirales	Rubulavirus	0	1	NA	NA	NA	NA	NA	5	TRUE	FALSE	N	SS	RNA	enveloped	1	0	ssRNA(-)	NA	NA	NA	0.705804
Southern_elephant_seal_virus	Togaviridae	Unassigned	Alphavirus	0	0	0	NA	NA	11245	2	2	TRUE	FALSE	NA	SS	RNA	enveloped	0	0	ssRNA(+)	0	0	0	0.633401
Squirrel_adenovirus	Adenoviridae	Unassigned	Mastadenovirus	0	0	0	NA	NA	35500	1	0	FALSE	FALSE	N	DS	DNA	non-enveloped	0	0	dsDNA	0	0	0	0.80697
Squirrel_fibroma_virus	Poxviridae	Unassigned	Leporipoxvirus	0	0	0	NA	NA	160000	2	3	TRUE	FALSE	N	DS	DNA	enveloped	0	0	dsDNA	0.358667	0.358667	0.358667	0.845733
Squirrel_monkey_retrovirus	Retroviridae	Ortervirales	Betaretrovirus	0	0	0	NA	NA	8785	29	39	FALSE	FALSE	N	SS	RNA	enveloped	0	0	ssRNA-RT	0	0	0	0.613822
Squirrel_parapoxvirus	Poxviridae	Unassigned	Parapoxvirus	0	0	0	NA	NA	140000	3	1	TRUE	FALSE	N	DS	DNA	enveloped	0	0	dsDNA	0.233362	0.233362	0.233362	0.845733
Suid_herpesvirus_1	Herpesviridae	Herpesvirales	Varicellovirus	0	1	1	137764	144489	141126	138	2250	FALSE	FALSE	N	DS	DNA	enveloped	1	1	dsDNA	0.623958	0.448633	0.458526	0.77642
Swine_norovirus	Caliciviridae	Unassigned	Norovirus	0	0	0	NA	NA	7800	1	1	TRUE	FALSE	N	SS	RNA	non-enveloped	0	0	ssRNA(+)	0	0	0	0.67177
Swinepox_virus	Poxviridae	Unassigned	Suipoxvirus	0	0	0	NA	NA	146454	138	45	TRUE	FALSE	N	DS	DNA	enveloped	0	0	dsDNA	0	0	0	0.67177
Tacaribe_virus	Arenaviridae	Bunyavirales	Arenavirus	0	1	0	NA	NA	10534	80	80	TRUE	TRUE	N	SS	RNA	enveloped	1	0	ssRNA(+/-)	0.439452	0.296554	0.301062	0.836713
Tai_forest_ebolavirus	Filoviridae	Mononegavirales	Ebolavirus	0	1	1	NA	NA	18865.5	25	24	TRUE	FALSE	N	SS	RNA	enveloped	1	1	ssRNA(-)	NA	NA	NA	0.130389
Tamiami_virus	Arenaviridae	Bunyavirales	Arenavirus	0	0	0	NA	NA	10674	17	9	TRUE	TRUE	N	SS	RNA	enveloped	0	0	ssRNA(+/-)	0.504284	0.504284	0.504284	0.801487
Tanapox_virus	Poxviridae	Unassigned	Yatapoxvirus	0	1	1	144553	144565	144559	34	17	TRUE	FALSE	N	DS	DNA	enveloped	1	0	dsDNA	0	0	0	0.387936
Taterapox_virus	Poxviridae	Unassigned	Orthopoxvirus	0	0	0	NA	NA	198050	1	2	TRUE	FALSE	N	DS	DNA	enveloped	0	0	dsDNA	0	0	0	0.817795
Thailand_virus	Hantaviridae	Bunyavirales	Orthohantavirus	0	1	0	NA	NA	15450	26	21	TRUE	TRUE	N	SS	RNA	enveloped	1	0	ssRNA(-)	0.0736537	0.0736537	0.0736537	0.706672
Theilovirus	Picornaviridae	Picornavirales	Cardiovirus	0	0	0	NA	NA	8101	15	587	TRUE	FALSE	N	SS	RNA	non-enveloped	0	0	ssRNA(+)	0.752515	0.492342	0.474113	0.845733
Thottapalayam_virus	Hantaviridae	Bunyavirales	Orthohantavirus	0	0	0	NA	NA	11732	35	15	TRUE	TRUE	N	SS	RNA	enveloped	0	0	ssRNA(-)	0	0	0	0.915664
Tioman_virus	Paramyxoviridae	Mononegavirales	Rubulavirus	0	1	0	NA	NA	15522	26	18	TRUE	FALSE	N	SS	RNA	enveloped	1	0	ssRNA(-)	0.26578	0.227711	0.265593	0.700963
Torque_Teno_virus	Anelloviridae	Unassigned	Anellovirus	0	1	1	3234	3814	3524	603	566	NA	FALSE	N	SS	DNA	non-enveloped	1	0	ssDNA(-)	0.871062	0.585145	0.642805	0.745671
Transmissible_gastroenteritis_virus	Coronaviridae	Nidovirales	Coronavirus	0	0	0	NA	NA	28597	736	863	TRUE	FALSE	N	SS	RNA	enveloped	0	0	ssRNA(+)	0	0	0	0.67177
Tree_shrew_adenovirus	Adenoviridae	Unassigned	Mastadenovirus	0	0	0	NA	NA	33501	7	8	FALSE	FALSE	N	DS	DNA	non-enveloped	0	0	dsDNA	0	0	0	0.714801
Tula_virus	Hantaviridae	Bunyavirales	Orthohantavirus	0	1	1	NA	NA	12066	52	39	TRUE	TRUE	N	SS	RNA	enveloped	1	1	ssRNA(-)	0.489857	0.332368	0.299518	0.744025
Tupaia_paramyxovirus	Paramyxoviridae	Mononegavirales	Unassigned	0	0	0	NA	NA	17904	4	7	TRUE	FALSE	N	SS	RNA	enveloped	0	0	ssRNA(-)	0	0	0	0.714801
Tupaiid_herpesvirus_1	Herpesviridae	Herpesvirales	Unassigned	0	0	0	NA	NA	196000	0	0	FALSE	FALSE	N	DS	DNA	enveloped	0	0	dsDNA	0	0	0	0.714801
Vaccinia_virus	Poxviridae	Unassigned	Orthopoxvirus	0	1	1	NA	NA	194711	9846	11148	TRUE	FALSE	N	DS	DNA	enveloped	1	0	dsDNA	0.839048	0.569562	0.619856	0.83635
Vesicular_exanthema_of_swine_virus	Caliciviridae	Unassigned	Vesivirus	0	0	0	NA	NA	8284	29	52	TRUE	FALSE	N	SS	RNA	non-enveloped	0	0	ssRNA(+)	0.523993	0.36414	0.407704	0.748729
Vesicular_stomatitis_New_Jersey_virus	Rhabdoviridae	Mononegavirales	Vesiculovirus	0	1	0	NA	NA	11123	23	32	TRUE	FALSE	N	SS	RNA	enveloped	1	0	ssRNA(-)	0.860876	0.510318	0.540868	0.833112
Visna/maedi_virus	Retroviridae	Ortervirales	Lentivirus	0	0	0	NA	NA	9202	62	23	TRUE	FALSE	N	SS	RNA	enveloped	0	0	ssRNA-RT	0	0	0	0.745671
Volepox_virus	Poxviridae	Unassigned	Orthopoxvirus	0	0	0	NA	NA	210000	3	4	TRUE	FALSE	N	DS	DNA	enveloped	0	0	dsDNA	0.447739	0.447739	0.447739	0.740291
Walrus_calicivirus	Caliciviridae	Unassigned	Unassigned	0	0	0	NA	NA	8289	4	6	TRUE	FALSE	N	SS	RNA	non-enveloped	0	0	ssRNA(+)	0	0	0	0.768076
West_Caucasian_bat_virus	Rhabdoviridae	Mononegavirales	Lyssavirus	0	0	0	NA	NA	12278	7	8	TRUE	FALSE	N	SS	RNA	enveloped	0	0	ssRNA(-)	0	0	0	0.783355
Whitewater_Arroyo_virus	Arenaviridae	Bunyavirales	Arenavirus	0	1	1	NA	NA	10448	33	17	TRUE	TRUE	N	SS	RNA	enveloped	1	1	ssRNA(+/-)	0.598166	0.370148	0.409045	0.82734
Woodchuck_hepatitis_virus	Hepadnaviridae	Unassigned	Orthohepadnavirus	0	0	0	NA	NA	3323	574	548	FALSE	FALSE	N	DS	DNA	enveloped	0	0	dsDNA-RT	0	0	0	0.806311
Woolly_monkey_sarcoma_virus	Retroviridae	Ortervirales	Gammaretrovirus	0	1	0	NA	NA	5159	2	235	FALSE	FALSE	N	SS	RNA	enveloped	1	0	ssRNA-RT	0	0	0	0.551975
Yaba_monkey_tumor_virus	Poxviridae	Unassigned	Yatapoxvirus	0	1	0	NA	NA	134721	15	115	TRUE	FALSE	N	DS	DNA	enveloped	1	0	dsDNA	0.651854	0.404027	0.600917	0.59005
Zaire_ebolavirus	Filoviridae	Mononegavirales	Ebolavirus	0	1	1	NA	NA	18959	55	54	TRUE	FALSE	N	SS	RNA	enveloped	1	1	ssRNA(-)	0.775329	0.510921	0.558495	0.789302

## Sheet: Table S3
Table S3. Database of host trait information used in our analysis (n=278 mammal species)
Genus	Species	AdultBodyMass_g	LitterSize	MaxLongevity_m	GestationLen_d	hHostNameFinal	Additional sources and/or proxies*	*Source is panTHERIA unless otherwise specified
Abrothrix	longipilis	38.86	3.7	12	20	Abrothrix_longipilis	Longevity proxied with Abrothrix olivaceus, panTHERIA; Gestation period proxied with Abrothrix speciocus, Shik et al. 1998. Growth, development, and reproduction in captive of the large Japanese Field Mouse, Apodemus speciosus. J. Fac. Agric. Kyushu Univ
Akodon	azarae	25.27	4.59	12	23	Akodon_azarae
Akodon	simulator	42.5	4.59	12	23	Akodon_simulator	Litter, lifespan, and gestation proxied with Akodon_azarae
Akodon	montensis	13.52	5	12	23	Akodon_montensis	Lifespan proxied with Akodon_azarae
Allenopithecus	nigroviridis	4749.96	1.01	276	165	Allenopithecus_nigroviridis	https://www.egzac.org/Content/Documents/Gestation_length.pdf
Alopex	lagopus	3584.37	7.65	180	52.99	Alopex_lagopus
Antrozous	pallidus	22.24	1.78	109.2	59.01	Antrozous_pallidus
Aotus	trivirgatus	912.4	1.06	303.6	133.47	Aotus_trivirgatus
Apodemus	agrarius	21.11	5.64	48	19.89	Apodemus_agrarius
Apodemus	sylvaticus	21.9	5.16	52.8	23.68	Apodemus_sylvaticus
Apodemus	flavicollis	31.6	4.94	48	24.5	Apodemus_flavicollis
Apodemus	peninsulae	2	4.41	52.79	22.69	Apodemus_peninsulae	Gestation proxied with genus-level average
Artibeus	jamaicensis	43.63	1	120	138.7	Artibeus_jamaicensis
Artibeus	lituratus	59.3	1	120	106.45	Artibeus_lituratus	Longevity proxied with Artibeus_jamaicensis
Artibeus	fimbriatus	63.89	1	120	122.575	Artibeus_fimbriatus	Longevity proxied with Artibeus_jamaicensis; gestation proxied with genus-level average
Arvicola	amphibius	120	4.76	60	21.24	Arvicola_amphibius
Atilax	paludinosus	3600.16	2	209	77.27	Atilax_paludinosus
Barbastella	barbastellus	8.31	1.73	252	53.55	Barbastella_barbastellus	Gestation proxied with Myotis thysanodes (same family and body mass)
Bos	taurus	618642	1	240	280.48	Bos_taurus
Callithrix	jacchus	290.21	2.31	201.6	144	Callithrix_jacchus
Calomys	tener	13.8	5.49	13.5	22.59	Calomys_tener	Lifespan proxied with Calomys_laucha; litter and gestation proxied with genus-level means
Calomys	laucha	14	5.3	13.5	25	Calomys_laucha	Hodara et al. 1989. Calomys laucha: growth and breeding in laboratory conditions. Lab Anim 23(4): 340-344
Calomys	musculinus	20.2	6.27	13.5	20.97	Calomys_musculinus	Lifespan proxied with Calomys_laucha
Calomys	callosus	44.95	4.91	13.5	21.8	Calomys_callosus	Lifespan proxied with Calomys_laucha
Camelus	dromedarius	492714	0.98	480	386.51	Camelus_dromedarius
Canis	mesomelas	8247.3	3.89	168	62.5	Canis_mesomelas
Canis	adustus	10392.5	4.5	137	65	Canis_adustus
Canis	latrans	11989.1	5.72	262	61.74	Canis_latrans
Canis	simensis	14361.9	4	230.25	63.61	Canis_simensis	Longevity proxied with genus-level mean; IUCN; SSC Canid Specialist Group (2011). Strategic Planning for Ethiopian wolf Conservation. IUCN/SSC Canid Specialist Group. Oxford, United Kingdom.
Canis	lupus	31756.5	4.98	354	63.5	Canis_lupus
Capra	hircus	47386.5	1.45	249.6	156	Capra_hircus
Carollia	perspicillata	19.23	1	148.8	114.6	Carollia_perspicillata
Castor	fiber	19000	2.95	300	106.42	Castor_fiber
Cephalophus	callipygus	19079.2	1	122.04	126	Cephalophus_callipygus	Litter, longevity, and gestation proxied with Cephalophus niger (same body mass)
Cercocebus	atys	6941.24	1.01	321.6	165.08	Cercocebus_atys
Cercocebus	agilis	7105.62	1	240	170	Cercocebus_agilis	Animal Diversity Web database, University of Michigan Museum of Zoology
Cercocebus	torquatus	7293.07	1.01	360	168.98	Cercocebus_torquatus
Cercocebus	chrysogaster	9000	1	360	170	Cercocebus_chrysogaster
Cercopithecus	erythrotis	3254.98	1.02	319.73	166.63	Cercopithecus_erythrotis	Longevity and gestation proxied with genus-level means
Cercopithecus	cephus	3444.88	1.01	276	169.51	Cercopithecus_cephus
Cercopithecus	pogonias	3578.27	1.01	289.2	169.51	Cercopithecus_pogonias
Cercopithecus	campbelli	3627.73	1.02	396	180.8	Cercopithecus_campbelli
Cercopithecus	mona	3980.17	1	360	166.63	Cercopithecus_mona	Gestation proxied with genus-level means
Cercopithecus	diana	4358.91	1.01	447.6	166.63	Cercopithecus_diana	Gestation proxied with genus-level means
Cercopithecus	mitis	5041.29	1	325.2	138.39	Cercopithecus_mitis
Cercopithecus	nictitans	5256.91	1	276	169.51	Cercopithecus_nictitans
Cercopithecus	solatus	5256.91	1.01	319.73	166.63	Cercopithecus_solatus	Longevity and gestation proxied with genus-level means
Cercopithecus	lhoesti	5307.47	1	192	166.63	Cercopithecus_lhoesti	Gestation proxied with genus-level means
Cercopithecus	neglectus	5324.52	1.02	315.6	172.07	Cercopithecus_neglectus
Cervus	nippon	53000	1	305.04	223.66	Cervus_nippon
Chlorocebus	aethiops	3695.99	1	379.2	162	Chlorocebus_aethiops	Animal Diversity Web database, University of Michigan Museum of Zoology
Chlorocebus	pygerythrus	2267.96	1	369.6	165	Chlorocebus_pygerythrus
Chrotopterus	auritus	78.26	0.99	120	86.09	Chrotopterus_auritus	Longevity proxied with _Phyllostomus hastatus (same family, similar body mass)
Colobus	guereza	9925.88	1	294	169.02	Colobus_guereza
Corynorhinus	townsendii	10.3	0.99	254	67.49	Corynorhinus_townsendii
Cricetomys	gambianus	1267.52	3.11	83.9999	31.45	Cricetomys_gambianus	Animal Diversity Web database, University of Michigan Museum of Zoology
Crocidura	leucodon	10.88	3.36	36	30.99	Crocidura_leucodon
Crocuta	crocuta	63370	1.91	493.2	112.33	Crocuta_crocuta
Cynictis	penicillata	694.41	2.15	182.4	56.83	Cynictis_penicillata
Cynomops	abrasus	35.39	0.98	60	106.86	Cynomops_abrasus	Longevity and gestation proxied with Chaerephon pumilus (same family)
Cynomys	ludovicianus	797.05	4.43	102	33.46	Cynomys_ludovicianus
Cynopterus	brachyotis	33.87	0.99	96	117.06	Cynopterus_brachyotis
Desmodus	rotundus	33.16	1	234	209.35	Desmodus_rotundus
Diaemus	youngi	36.71	1	240	258	Diaemus_youngi	Animal Diversity Web database, University of Michigan Museum of Zoology
Diclidurus	albus	16.56	1	60	91.24	Diclidurus_albus	Longevity and gestation proxied with Taphozous perforatus (same family, similar body mass)
Didelphis	virginiana	2442.08	8.62	60	12.69	Didelphis_virginiana
Diphylla	ecaudata	28.11	0.99	95.9999	243.334	Diphylla_ecaudata	Animal Diversity Web database, University of Michigan Museum of Zoology; AnAge database
Eidolon	helvum	254.61	1.08	261.99	164.36	Eidolon_helvum
Elephas	maximus	3.26979e+06	1.41	960	634.49	Elephas_maximus
Eonycteris	spelaea	58.7	1	60	152.18	Eonycteris_spelaea
Epomops	franqueti	118.99	1	274.8	161.77	Epomops_franqueti	Longevity proxied with _P_Rousettus aegyptiacus (same family, similar body mass)
Eptesicus	diminutus	5.99	1.68	259.312	104.002	Eptesicus_diminutus	Litter, longevity, and gestation proxied with genus-level mean
Eptesicus	furinalis	7.7	1.86	320.25	92.54	Eptesicus_furinalis	Longevity proxied with genus-level mean
Eptesicus	brasiliensis	9.2	1.46	405	205.887	Eptesicus_brasiliensis	Longevity and gestation proxied with genus-level mean
Eptesicus	fuscus	17.49	1.85	240	52.14	Eptesicus_fuscus
Eptesicus	serotinus	23.09	1.5	72	65.44	Eptesicus_serotinus
Equus	asinus	164998	1	564	367	Equus_asinus
Equus	caballus	403599	1	744	338.97	Equus_caballus
Euderma	maculatum	16.17	1	154	54.14	Euderma_maculatum	Longevity and gestation proxied with _Vespertilio murinus (same family, similar body mass)
Eumops	auripendulus	28.49	0.98	144	85	Eumops_auripendulus	Gestation proxied with Eumops_perotis; longevity proxied with Eumops_perotis
Eumops	glaucinus	36.2	1.04	144	85	Eumops_glaucinus	Gestation proxied with Eumops_perotis; longevity proxied with Eumops_perotis
Eumops	perotis	50.97	0.99	144	85	Eumops_perotis	https://www.desertmuseum.org/kids/bats/greater_mastiff_bat.php
Eumops	patagonicus	38.55	1.003	144	85	Eumops_patagonicus	Mass and litter proxied with genus-level averages; Gestation proxied with Eumops_perotis; longevity proxied with Eumops_perotis
Felis	nigripes	1362.77	1.78	144	67.5	Felis_nigripes
Felis	catus	2884.8	2.685	408	62.99	Felis_catus	Litter proxied with genus-level mean
Felis	silvestris	4573.08	3.59	336	65.49	Felis_silvestris
Funisciurus	congicus	112	2.44	114	54.23	Funisciurus_congicus
Funisciurus	anerythrus	223.54	1.32	114	54.23	Funisciurus_anerythrus	Longevity and gestation proxied with Funisciurus_congicus
Genetta	genetta	1756.17	2.29	408	74.18	Genetta_genetta
Glis	glis	128.09	5.17	108	28.19	Glis_glis
Globicephala	melas	800000	1	540	479.06	Globicephala_melas
Gorilla	gorilla	112589	1.05	648	257	Gorilla_gorilla
Gorilla	beringei	149325	1.05	648	257	Gorilla_beringei	Litter, longevity, and gestation proxied with Gorilla_gorilla
Halichoerus	grypus	197570	0.96	560.07	349.79	Halichoerus_grypus
Herpestes	sanguinea	543.83	2.5	72	61.27	Herpestes_sanguineus
Hipposideros	larvatus	19.95	0.98	144	161.65	Hipposideros_larvatus	Longevity and gestation proxied with Hipposideros_fulvus
Histiotus	montanus	15.94	1.5	144	52.14	Histiotus_montanus	Litter, lifespan, and gestation proxied with _Vespertilio murinus (same family, similar body mass)
Hydrochoerus	hydrochaeris	48144.9	3.49	144	150.73	Hydrochoerus_hydrochaeris
Hydromys	chrysogaster	626.17	3.51	74	36.6	Hydromys_chrysogaster
Hylaeamys	megacephalus	57	3.72	45	27.28	Hylaeamys_megacephalus
Hypsignathus	monstrosus	336.97	1.4	360	125.14	Hypsignathus_monstrosus	Animal Diversity Web database, University of Michigan Museum of Zoology
Ichneumia	albicauda	3628.4	2.35	144	77	Ichneumia_albicauda	Animal Diversity Web database, University of Michigan Museum of Zoology; Gestation proxied with Egyptian mongoose
Lama	glama	78322.7	1	339.6	342.74	Lama_glama
Lasionycteris	noctivagans	11.02	1.77	144	53.55	Lasionycteris_noctivagans
Lasiurus	seminolus	9.88	2.68	25.2	79.203	Lasiurus_seminolus	Animal Diversity Web database, University of Michigan Museum of Zoology; Longevity and gestation proxied with genus-level mean
Lasiurus	ega	12.2	2.14	25.2	96.22	Lasiurus_ega	Longevity proxied with genus-level mean
Lasiurus	borealis	12.33	3.12	25.2	84.21	Lasiurus_borealis	Longevity proxied with genus-level mean
Lasiurus	intermedius	22.96	2.97	25.2	79.203	Lasiurus_intermedius	Longevity and gestation proxied with genus-level mean
Lasiurus	cinereus	27.06	1.96	25.2	57.18	Lasiurus_cinereus
Lasiurus	xanthinus	16.886	2.574	25.2	79.203	Lasiurus_xanthinus	All traits proxied with genus-level average
Lasiurus	blossevillii	16.886	2.574	25.2	79.203	Lasiurus_blossevillii	All traits proxied with genus-level average
Leptonycteris	nivalis	24.26	1	120	121.66	Leptonycteris_nivalis	Animal Diversity Web database, University of Michigan Museum of Zoology
Lophocebus	albigena	7418.71	1.01	392.4	182.64	Lophocebus_albigena
Lophuromys	sikapusi	62.72	3	392.4	182.64	Lophuromys_sikapusi	Longevity and gestation proxied with Lophocebus_albigena
Loxodonta	africana	3.82454e+06	0.84	960	660	Loxodonta_africana
Loxodontomys	micropus	70.76	4.16	24	20.11	Loxodontomys_micropus	Longevity and gestation proxied with __Lemmus lemmus(same family, similar body mass)
Lycaon	pictus	22000	8.1	132	71.18	Lycaon_pictus
Lynx	lynx	19300	2.3	321.6	66.99	Lynx_lynx
Macaca	fascicularis	4569.32	1	456	164.69	Macaca_fascicularis
Macaca	radiata	4999.99	1.01	360	161.56	Macaca_radiata
Macaca	cyclopis	5748.94	1	360	161.06	Macaca_cyclopis	Animal Diversity Web database, University of Michigan Museum of Zoology
Macaca	silenus	5995.25	1.01	480	172	Macaca_silenus
Macaca	mulatta	6455.19	1.01	432	166.07	Macaca_mulatta
Macaca	maura	7290.3	1.01	319.067	167.19	Macaca_maura	Longevity proxied with genus-level mean
Macaca	nemestrina	7820.78	1.01	411.6	171	Macaca_nemestrina
Macaca	arctoides	9358.04	1.01	360	176.6	Macaca_arctoides
Macaca	fuscata	10114.8	1.02	396	172.99	Macaca_fuscata
Macaca	sylvanus	11471.5	1.02	264	164.84	Macaca_sylvanus
Macrotus	californicus	11.83	1	124.8	250.29	Macrotus_californicus
Mandrillus	leucophaeus	14253.3	1.01	400.8	179.22	Mandrillus_leucophaeus
Mandrillus	sphinx	16685.1	1.02	555.96	173.99	Mandrillus_sphinx
Marmota	monax	3880.93	4.1	120	31.5	Marmota_monax
Mastomys	natalensis	41.85	9.23	60	23.64	Mastomys_natalensis	Longevity proxied with _Acomys cahirinus (same family, similar body mass)
Mastomys	erythroleucus	64.07	11.23	36	21.13	Mastomys_erythroleucus	Longevity proxied with __Colomys goslingi (same family, similar body mass)
Mellivora	capensis	8999.99	2.35	318	181.46	Mellivora_capensis
Mephitis	mephitis	2399.99	5.7	155	63.29	Mephitis_mephitis
Meriones	libycus	91.33	4.54	62.3999	25.43	Meriones_libycus	Animal Diversity Web database, University of Michigan Museum of Zoology
Mesocricetus	auratus	98.6	8.79	120	15.49	Mesocricetus_auratus
Micropteropus	pusillus	25.38	0.99	96	161.77	Micropteropus_pusillus	Longevity proxied with Cynopterus brachyotis (same family, similar body mass)
Microtus	subterraneus	17.74	2.46	32.4	21	Microtus_subterraneus	Longevity proxied with genus-level mean
Microtus	arvalis	26.9	4.99	36	21	Microtus_arvalis
Microtus	oeconomus	33.1	5.62	21.6	21.51	Microtus_oeconomus
Microtus	levis	35.49	4.612	32.4	21.0575	Microtus_levis	Litter, longevity and gestation proxied with genus-level mean
Microtus	agrestis	35.87	4.65	39.6	20.72	Microtus_agrestis
Microtus	fortis	63	5.34	32.4	21.0575	Microtus_fortis	Longevity and gestation proxied with genus-level mean
Miniopterus	schreibersii	11.46	0.99	168	182.5	Miniopterus_schreibersii
Miniopterus	inflatus	14.9	0.99	168	91.24	Miniopterus_inflatus	Longevity proxied with Miniopterus_schreibersii
Molossus	molossus	13.7	0.99	67.1999	107.97	Molossus_molossus	AnAge database
Molossus	rufus	13.7	0.99	67.1999	107.97	Molossus_rufus	All traits proxied with Molossus_molossus
Mus	booduga	13.78	5.96	72	19.6	Mus_booduga	Longevity and gestation proxied with Mus_musculus
Mus	musculus	19.3	5.54	72	19.6	Mus_musculus
Mustela	lutreola	566.44	4.5	120	43.74	Mustela_lutreola
Myodes	rutilus	19.94	5.6	41.4	23.98	Myodes_rutilus	Longevity proxied with genus-level mean
Myodes	glareolus	20.73	4.31	58.8	19.74	Myodes_glareolus
Myodes	rufocanus	36.43	5.01	24	18	Myodes_rufocanus	Animal Diversity Web database, University of Michigan Museum of Zoology
Myodes	regulus	25.7	4.973	41.4	20.573	Myodes_regulus	All traits proxied with genus-level average
Myonycteris	torquata	44.92	1	360	152.083	Myonycteris_torquata	Animal Diversity Web database, University of Michigan Museum of Zoology
Myotis	californicus	4.39	0.99	180	61.95	Myotis_californicus	Gestation proxied with genus-level means
Myotis	riparius	4.57	0.98	252	61.95	Myotis_riparius	Animal Diversity Web database, University of Michigan Museum of Zoology; Gestation proxied with genus-level means
Myotis	yumanensis	5.15	0.99	105.96	61.95	Myotis_yumanensis	Gestation proxied with genus-level means
Myotis	leibii	5.22	0.99	144	61.95	Myotis_leibii	Gestation proxied with genus-level means
Myotis	keenii	6.51	0.99	222	60	Myotis_keenii	Animal Diversity Web database, University of Michigan Museum of Zoology
Myotis	evotis	6.91	0.98	264	60	Myotis_evotis	Animal Diversity Web database, University of Michigan Museum of Zoology
Myotis	nattereri	7.25	0.99	180	61.95	Myotis_nattereri	Gestation proxied with genus-level means
Myotis	daubentonii	7.63	1.21	336	55.14	Myotis_daubentonii
Myotis	lucifugus	7.8	1	408	59.79	Myotis_lucifugus
Myotis	velifer	9.82	0.99	135.96	63.77	Myotis_velifer
Myotis	grisescens	10.84	0.99	471.24	61.95	Myotis_grisescens	Gestation proxied with genus-level means
Myotis	dasycneme	15.16	1	234	61.95	Myotis_dasycneme	Gestation proxied with genus-level means
Myotis	myotis	25.59	1.5	264	73	Myotis_myotis
Myotis	septentrionalis	8.63	1.039	234.37	61.95	Myotis_septentrionalis	All traits proxied with genus-level average
Myotis	chiloensis	8.41	0.98	234.37	61.95	Myotis_chiloensis	Gestation and longevity proxied with genus-level means
Myotis	nigricans	4.2	1	84	61.95	Myotis_nigricans	Gestation proxied with genus-level means
Necromys	lasiurus	39.93	4.5	11	21.97	Necromys_lasiurus	Longevity proxied with _Microtus pennsylvanicus (same family, similar body mass)
Necromys	obscurus	40.69	4.86	11	21.97	Necromys_obscurus	Gestation proxied with Necromys_lasiurus
Necromys	benefactus	40.31	4.68	11	21.97	Necromys_benefactus	Body mass and litter proxied with genus-level mean; Gestation proxied with Necromys_lasiurus
Neotoma	lepida	143.88	2.7	92.4	32.99	Neotoma_lepida	Longevity proxied with Neotoma_albigula
Neotoma	albigula	208.18	2.14	92.4	37	Neotoma_albigula
Neotoma	cinerea	285.89	3.45	92.4	29.69	Neotoma_cinerea
Neovison	vison	660	4.5	136.8	57.5	Neovison_vison
Nephelomys	albigularis	60.5	3.4	5	26.7	Nephelomys_albigularis	Animal Diversity Web database, University of Michigan Museum of Zoology
Niviventer	confucianus	65.05	3.7	12	21	Niviventer_confucianus	Zhang et al. 2006. Reproductive ecology of sulphur bellied rat (Niviventer confucianus) populations in the Dongting Lake region. Acta Ecologica Sinica 26(3): 884-894.
Nomascus	leucogenys	7320	1	336	212.917	Nomascus_leucogenys	Animal Diversity Web database, University of Michigan Museum of Zoology
Nyctalus	noctula	28.48	1.33	144	72.24	Nyctalus_noctula
Nyctereutes	procyonoides	4214.99	6.36	168	61.84	Nyctereutes_procyonoides
Nycteris	thebaica	9.2	1	120	114.95	Nycteris_thebaica	Longevity proxied with _Haplonycteris fischeri (same family, similar body mass)
Nycticeius	humeralis	9.12	1.94	60	91.2501	Nycticeius_humeralis	Gestation proxied with Nyctinomops_macrotis
Nyctinomops	laticaudatus	13.12	0.99	60	91.2501	Nyctinomops_laticaudatus	Longevity proxied with Nycticeius_humeralis; Nyctinomops_macrotis; Gestation proxied with Nyctinomops_macrotis
Nyctinomops	macrotis	16.38	0.99	60	91.2501	Nyctinomops_macrotis	Longevity proxied with Nycticeius_humeralis
Oecomys	bicolor	40.74	3.15	11	21.4	Oecomys_bicolor	Longevity and gestation proxied with _Microtus pennsylvanicus (same family, similar body mass)
Oligoryzomys	nigripes	20.33	3.59	21.5	20.59	Oligoryzomys_nigripes	Longevity and gestation proxied with _Phodopus campbelli (same family, similar body mass)
Oligoryzomys	flavescens	21.3	4.95	21.5	20.59	Oligoryzomys_flavescens	Longevity and gestation proxied with _Phodopus campbelli (same family, similar body mass)
Oligoryzomys	microtis	22.5	4.2375	21.5	20.59	Oligoryzomys_microtis	Litter proxied with genus-level mean; Longevity and gestation proxied with _Phodopus campbelli (same family, similar body mass)
Oligoryzomys	chacoensis	23	4.2375	21.5	20.59	Oligoryzomys_chacoensis	Litter proxied with genus-level mean; Longevity and gestation proxied with _Phodopus campbelli (same family, similar body mass)
Oligoryzomys	fulvescens	25	3.64	21.5	20.59	Oligoryzomys_fulvescens	Longevity and gestation proxied with _Phodopus campbelli (same family, similar body mass)
Oligoryzomys	longicaudatus	27.54	4.77	21.5	20.59	Oligoryzomys_longicaudatus	Longevity and gestation proxied with _Phodopus campbelli (same family, similar body mass)
Ondatra	zibethicus	991.31	6.55	120	27.86	Ondatra_zibethicus
Oryctolagus	cuniculus	1590.57	5.24	216	30.45	Oryctolagus_cuniculus
Oryzomys	palustris	53.26	4.08	28.5	24.74	Oryzomys_palustris
Otocyon	megalotis	4098.12	4	165.6	67.54	Otocyon_megalotis
Ovibos	moschatus	312500	1.01	288	256.26	Ovibos_moschatus
Ovis	aries	39097.9	1.19	230.04	152.54	Ovis_aries
Paguma	larvata	4300	2.16	216	61.27	Paguma_larvata	Gestation proxied with _Paradoxurus hermaphroditus (same family, similar body mass)
Pan	paniscus	35119.9	1.01	576	235.24	Pan_paniscus
Pan	troglodytes	45000	1.05	720	231.49	Pan_troglodytes
Panthera	pardus	52400	2.14	276	96.74	Panthera_pardus
Papio	hamadryas	14007.1	1.01	450	180	Papio_hamadryas
Papio	cynocephalus	15822.1	1.01	540	172.99	Papio_cynocephalus
Papio	anubis	17728.6	1.01	302.4	178.96	Papio_anubis
Papio	ursinus	17729.4	1.01	540	185.92	Papio_ursinus
Papio	papio	18026	1.01	480	184.42	Papio_papio
Peromyscus	leucopus	18.07	4.27	38	23.17	Peromyscus_leucopus
Peromyscus	maniculatus	19.98	4.76	12	26.68	Peromyscus_maniculatus	Animal Diversity Web database, University of Michigan Museum of Zoology
Phoca	vitulina	87316.7	1	480	288.95	Phoca_vitulina
Phyllostomus	hastatus	91.44	0.99	120	123.39	Phyllostomus_hastatus
Pipistrellus	hesperus	3.56	1.86	72.99	40	Pipistrellus_hesperus	Animal Diversity Web database, University of Michigan Museum of Zoology
Pipistrellus	pipistrellus	5.3	1.37	200.4	44	Pipistrellus_pipistrellus
Pipistrellus	subflavus	5.74	1.96	180	45.71	Pipistrellus_subflavus
Pipistrellus	nathusii	7.44	1.73	96	43.237	Pipistrellus_nathusii	Gestation proxied with genus-level means
Platyrrhinus	lineatus	24.34	0.99	122.4	107.97	Platyrrhinus_lineatus
Plecotus	auritus	8.19	1.22	360	65.12	Plecotus_auritus
Pongo	abelii	39696.1	1.07	696	251	Pongo_abelii	Animal Diversity Web database, University of Michigan Museum of Zoology; Litter proxied with Pongo_pygmaeus
Pongo	pygmaeus	53408.3	1.07	720	259.42	Pongo_pygmaeus
Procolobus	rufomitratus	8070	1.01	360	195	Procolobus_rufomitratus		Animal Diversity Web database, University of Michigan Museum of Zoology
Procolobus	badius	8430	1	360	151.46	Procolobus_badius	Longevity proxied with Procolobus_rufomitratus
Procyon	lotor	6373.72	3.06	252	65	Procyon_lotor
Proechimys	guyannensis	314.03	2.16	57.6	63.41	Proechimys_guyannensis
Proteles	cristata	8139.39	2.64	300	90.62	Proteles_cristata
Pseudalopex	vetulus	4233.47	3	164.4	60.8334	Pseudalopex_vetulus	Longevity proxied with Rattus_rattus
Pteronotus	davyi	9.52	0.99	179.76	60	Pteronotus_davyi	Animal Diversity Web database, University of Michigan Museum of Zoology; Longevity proxied with family-level mean
Pteropus	lylei	319.75	0.99625	180	166	Pteropus_lylei	Animal Diversity Web database, University of Michigan Museum of Zoology; Litter proxied with genus-level mean
Pteropus	scapulatus	380.35	1	179.76	136.875	Pteropus_scapulatus	Longevity proxied with genus-level mean
Pteropus	hypomelanus	435.61	1	108	195	Pteropus_hypomelanus	Animal Diversity Web database, University of Michigan Museum of Zoology
Pteropus	alecto	610.13	1	53.9999	177.517	Pteropus_alecto	Animal Diversity Web database, University of Michigan Museum of Zoology
Pteropus	poliocephalus	702.78	1	180	187.72	Pteropus_poliocephalus	Animal Diversity Web database, University of Michigan Museum of Zoology
Pteropus	conspicillatus	760.71	1	179.76	212.917	Pteropus_conspicillatus	Animal Diversity Web database, University of Michigan Museum of Zoology; Longevity proxied with genus-level mean
Pteropus	giganteus	824.85	0.99	376.8	166.59	Pteropus_giganteus
Pteropus	vampyrus	1027.54	0.99	179.76	177.517	Pteropus_vampyrus	Longevity and gestation proxied with genus-level mean
Puma	concolor	53954.1	2.76	240	92.3	Puma_concolor
Pygathrix	nemaeus	9411.1	1.01	300	182.88	Pygathrix_nemaeus
Rangifer	tarandus	109088	2	242.4	222.5	Rangifer_tarandus
Rattus	losea	104.63	7.435	50.4	22.595	Rattus_losea	Longevity proxied with Rattus_rattus; Litter and gestation proxied with genus-level mean
Rattus	tanezumi	140.84	7.435	50.4	22.595	Rattus_tanezumi	Longevity proxied with Rattus_rattus
Rattus	rattus	142.68	5.88	50.4	23.45	Rattus_rattus
Rattus	norvegicus	282.89	8.99	50.4	21.74	Rattus_norvegicus	Longevity proxied with Rattus_rattus
Rhinolophus	macrotis	6.18	0.98	360	91.673	Rhinolophus_macrotis	Longevity proxied with Rhinolophus_ferrumequinum; Gestation proxied with genus-level mean
Rhinolophus	euryale	9.25	1	360	92.54	Rhinolophus_euryale	Longevity proxied with Rhinolophus_ferrumequinum
Rhinolophus	blasii	10.29	0.9867	360	91.24	Rhinolophus_blasii	Longevity proxied with Rhinolophus_ferrumequinum; Litter proxied with genus-level mean
Rhinolophus	pearsonii	11.55	0.9867	360	91.673	Rhinolophus_pearsonii	Longevity proxied with Rhinolophus_ferrumequinum; Litter and gestation proxied with genus-level mean
Rhinolophus	mehelyi	14.03	0.9867	360	91.673	Rhinolophus_mehelyi	Longevity proxied with Rhinolophus_ferrumequinum; Litter and gestation proxied with genus-level mean
Rhinolophus	eloquens	19.15	0.9867	360	91.673	Rhinolophus_eloquens	Longevity proxied with Rhinolophus_ferrumequinum; Litter and gestation proxied with genus-level mean
Rhinolophus	ferrumequinum	22.59	0.98	360	91.24	Rhinolophus_ferrumequinum
Rhinolophus	sinicus	11.25	0.9867	360	91.673	Rhinolophus_sinicus	Longevity proxied with Rhinolophus_ferrumequinum; Litter and gestation proxied with genus-level mean; Body-mass: http://www.bio.bris.ac.uk/research/bats/China%20bats/rhinolophussinicus.htm
Rhombomys	opimus	4.75	4.59	48	27.5	Rhombomys_opimus
Rousettus	aegyptiacus	134	1.07	274.8	123.39	Rousettus_aegyptiacus
Saccolaimus	saccolaimus	43	1	60	106.86	Saccolaimus_saccolaimus	Longevity and gestation proxied with _Taphozous georgianus (Same family, similar body mass)
Saccolaimus	flaviventris	45.25	1	60	106.86	Saccolaimus_flaviventris	Longevity and gestation proxied with _Taphozous georgianus (Same family, similar body mass)
Saimiri	sciureus	749.47	1	324	164.09	Saimiri_sciureus
Sciurus	vulgaris	333	4.5	144	38	Sciurus_vulgaris
Sciurus	variegatoides	485	4.99	216	41.395	Sciurus_variegatoides	Longevity and gestation proxied with genus-level mean
Sciurus	carolinensis	545.4	2.98	288	44.79	Sciurus_carolinensis	Encyclopedia of Life database; Skinner, J.D. & Smithers, R.H.N. (1990). The mammals of the southern African subregion (2nd ed.). Pretoria (South Africa): University of Pretoria. p. 771. ISBN 0-86979-802-2.
Sigmodon	alstoni	55.7	5.18	62.4	27	Sigmodon_alstoni	Longevity and gestation proxied with Sigmodon_hispidus
Sigmodon	hispidus	110.65	5.44	62.4	27	Sigmodon_hispidus	Encyclopedia of Life database
Sooretamys	angouya	120.17	4.08	28.5	24.74	Sooretamys_angouya	In genus Oryzomys so litter, longevity, and gestation proxied with Oryzomys_palustris
Spermophilus	undulatus	742.91	7.77	60	25.33	Spermophilus_undulatus	Longevity proxied with _Spermophilus beecheyi
Spermophilus	fulvus	778.38	5.99	60	30.41	Spermophilus_fulvus
Suricata	suricatta	729.99	3.86	150	77	Suricata_suricatta
Sus	scrofa	84471.5	4.52	252	115.2	Sus_scrofa	Encyclopedia of Life database
Tadarida	brasiliensis	12.61	1.11	180	89.99	Tadarida_brasiliensis
Thaptomys	nigrita	19.9	5.44	62.4	27	Thaptomys_nigrita	Encyclopedia of Life database; Proxied litter, longevity, and gestation with Sigmodon hispidus (in same family, also South American rodent)
Theropithecus	gelada	15964.1	1.01	336	178.64	Theropithecus_gelada	Encyclopedia of Life database
Trachypithecus	francoisi	8139.93	1	315.6	197.709	Trachypithecus_francoisi	Animal Diversity Web database, University of Michigan Museum of Zoology
Tragelaphus	strepsiceros	206056	1	276	220.94	Tragelaphus_strepsiceros	Encyclopedia of Life database
Uroderma	bilobatum	16.28	0.99	125	130.88	Uroderma_bilobatum	Longevity proxied with _Macrotus waterhousii (same family, similar body mass)
Vespertilio	murinus	15.42	1.5	144	52.14	Vespertilio_murinus	Encyclopedia of Life database
Vulpes	corsac	2615.33	5.62	156	54.99	Vulpes_corsac	Encyclopedia of Life database; Animal Diversity Web database, University of Michigan Museum of Zoology
Vulpes	vulpes	4820.36	4.59	180	52.5	Vulpes_vulpes	Encyclopedia of Life database
Zygodontomys	brevicauda	52.22	4.23	12	25.39	Zygodontomys_brevicauda	Encyclopedia of Life database; Animal Diversity Web database, University of Michigan Museum of Zoology

## Sheet: Table S4
Table S4. Metadata for variables included in both Table S1 and Table S2 databases
variable name	description	source
vVirusNameCorrected	virus species scientific name	Olival et al. 2017
hHostNameFinal	host genus and species scientific name	Olival et al. 2017
reservoir.status	1=reservoir host; 2=secondary host	this study
spillover.capacity	1=the spillover host, or typical source of human infection; 0=no recorded transmission to humans, or very rarely the source of human infection	this study
animal.severity	1=almost always asymptomatic; 2=symptomatic cases reported, but low mortality rate; 3=primarily symptomatic, but low mortality rate; 4=primarily symptomatic, associated with severe disease and a high mortality rate	this study
trans.route	what are the 1-3 primary transmission routes associated with the virus	this study
lower.mort	minimum recorded human case fatality rate	this study
upper.mort	maximum recorded human case fatality rate	this study
avg.mort	average of maximum and minimum recorded human case fatality rates	this study
inf.period	(1 = all cases are acute, 2 = capacity for acute or chronic cases, 3 = all cases are chronic)	this study
symptoms	what are the 1-3 primary symptoms associated with viral infection	this study
human.trans	1 = human-to-human transmission not recorded, 2 = human-to-human transmission recorded, but short-lived and not typical, 3 = human-to-human transmission, but outbreaks are self-limiting in human populations, 4 = endemic human transmission reported	this study
recombination	virus recombination frequency as classified by Geoghegan et al. 2016 and/or the literature	Geoghegan et al. 2016
notes	Any additional, potentially relevant information found in literature searches	this study
DetectionMethod	The method used to detect the virus in the nonhuman mammalian host (serology, PCR, or isolation)	Olival et al. 2017
hOrder	host order	Olival et al. 2017
hFamily	host family	Olival et al. 2017
hGenus	host genus	Olival et al. 2017
hSpecies	host species	Olival et al. 2017
vOrder	virus order	ICTV
vFamily	virus family	ICTV
vSubfamily	virus subfamily	ICTV
vGenus	virus genus	ICTV
vGenomeAveLength	average length of the genome	Olival et al. 2017, Geoghegan et al. 2016, Walker et al. 2018
vCytoReplicTF	whether or not the virus replicates in the cytoplasm	Olival et al. 2017, Geoghegan et al. 2016, Walker et al. 2018
vSegmentedTF	whether or not the virus is segmented	Olival et al. 2017, Geoghegan et al. 2016, Walker et al. 2018
vSSoDS	whether the virus is single or double stranded	Olival et al. 2017, Geoghegan et al. 2016, Walker et al. 2018
vDNAoRNA	whether the virus is RNA or DNA	Olival et al. 2017, Geoghegan et al. 2016, Walker et al. 2018
vEnvelope	whether or not the virus is enveloped	Olival et al. 2017, Geoghegan et al. 2016, Walker et al. 2018
References_traits	references for data collected in this study	this study
References_detection	references for the virus-mammal association	Olival et al. 2017
phylo.dist.humans.species	nonhuman host species phylogenetic distance to humans calculated from a maximum likelihood cytB tree	Olival et al. 2017
hAllZACites	all citations for a given host	Olival et al. 2017
hDiseaseZACites	zoological abstract disease-related citations for a given host	Olival et al. 2017
AdultBodyMass_g	median adult body mass (grams)	panTHERIA; Animal Diversity Web; University of Michigan Museum of Zoology; AnAge; Encyclopedia of Life
LitterSize	median litter size	panTHERIA; Animal Diversity Web; University of Michigan Museum of Zoology; AnAge; Encyclopedia of Life
MaxLongevity_m	median lifespan (months)	panTHERIA; Animal Diversity Web; University of Michigan Museum of Zoology; AnAge; Encyclopedia of Life
GestationLen_d	median gestation period (days)	panTHERIA; Animal Diversity Web; University of Michigan Museum of Zoology; AnAge; Encyclopedia of Life
zoonoses	number of directly-transmitted zoonoses identified in a species via PCR or isolation	recalculated using databases from Olival et al. 2017
TotVirus	number of total directly-transmitted viruses identified in a species	recalculated using databases from Olival et al. 2017
max_breadth	maximum phylogenetic breadth of all nonhuman host species calculated from a maximum likelihood cytB tree	Olival et al. 2017
mean_breadth	mean phylogenetic breadth of all nonhuman host species calculated from a maximum likelihood cytB tree	Olival et al. 2017
median_breadth	median phylogenetic breadth of all nonhuman host species calculated from a maximum likelihood cytB tree	Olival et al. 2017
max.hum.dist	maximum nonhuman host species phylogenetic distance to humans for a given virus, calculated from a maximum likelihood cytB tree	Olival et al. 2017
IsZoonotic	whether or not a virus has been detected in both human and non-human mammal species	Olival et al. 2017
IsZoonotic.stringent	whether or not a virus has been detected in both human and non-human mammal species by PCR or viral isolation	Olival et al. 2017
trans.stat	spillover type' code which distinguishes between "primary" spillover from a reservoir host species, and "secondary" spillover from a secondary (bridge) host. "reservoir_only" indicates a reservoir host with no recorded transmission to humans, and "secondary_only" indicates a secondary host with no recorded transmission to humans	this study
Genome.comp	virus genome composition obtained from ICTV	ICTV
ReverseZoonoses	whether or not human to nonhuman mammal transmission has been recorded for a given virus	Olival et al. 2017
IsHoSa	whether or not a virus is known to infect humans using any detection criteria	Olival et al. 2017
IsHoSa.stringent	whether or not a virus has been recorded to infect humans with PCR or viral isolation evidence	Olival et al. 2017
vGenomeMinLength	minimum genome length of a given virus	Olival et al. 2017
vGenomeMaxLength	maximum genome length of a given virus	Olival et al. 2017
vWOKcites	number of Web of Knowledge citations for a given virus	Olival et al. 2017
vPubMedCites	number of PubMed citations for a given virus	Olival et al. 2017
vVectorYNna	whether or not the virus is vector-borne (used to subset viruses considered in this analysis)	Olival et al. 2017

## Sheet: Table S5
Table S5. Summaries of all selected generalized additive models (GAMs) included in our analysis. Included terms (based on an effective degree of freedom cutoff of 0.001) are in bold.
Table S5a. Summary of the selected GAM for host traits predictive of human case fatality rates (family = gaussian, n=78). This analysis included only unique human case fatality rate entries for each host order per virus. Terms represent maximum values for hosts encapsulated in each unique entry. We further restricted this analysis to hosts that are both reservoirs and have evidence of animal-to-h…
Term	value	T statistic	F-value	P-value	Effective degrees of freedom	Total deviance explained
						51.4
Intercept	22.176	6.837		<0.001***
max gestation period			2.46	<0.001***	2.02
max litter size			0	0.795312	<0.001
max lifespan			2.966	<0.01**	4.448
host order			0.1	0.145189	0.4505
max number of disease-related citations			0	0.360669	<0.001
max body mass			0.053	<0.1*	0.1398
max host phylogenetic distance from humans			3.481	<0.001***	1.913
Table S5b. Summary of the selected GAM for host traits predictive of the extent of human-to-human transmission of a given virus following spillover (family = ocat, n=78). This analysis used the simplified host order dataset as defined in the models outlined in Table S5a.
Term	value	Z statistic	Chi-sq statistic	P-value	Effective degrees of freedom	Total deviance explained
						26.5
Intercept	-1.0306	-3.857		<0.001***
max gestation period			0	0.6484	<0.001
max litter size			2.698	<0.1*	0.73
max lifespan			1.593	<0.1*	0.6125
host order			0	0.844	<0.001
max number of disease-related citations			0	0.3257	<0.001
max body mass			1.322	0.1256	0.5754
max host phylogenetic distance from humans			22.253	<0.001***	0.9583
Table S5c. Summary of the selected GAM for modeling the relationship between human case fatality rates and host phylogenetic distance from humans as a function of spillover type (family = gaussian, n=80). In this analysis, we included only unique entries for each host order per virus, simplifying the datast as outlined in Table S5a. However, in this analysis, we considered both reservoir and seco…
Term	value	T statistic	F value	P-value	Effective degrees of freedom	Total deviance explained
						66.8
Intercept	11.94	0.848		0.399
phylogenetic distance from humans, by = primary spillover type			1.701	<0.01**	1.492
phylogenetic distance from humans, by = secondary spillover type			1.289	<0.1*	1.622
max gestation period			7.728	<0.001***	3.334
max litter size			0	0.816398	<0.001
max lifespan			7.186	<0.001***	5.315
host order			0.947	<0.01**	1.779
max number of disease-related citations			0	0.766503	<0.001
max body mass			0	0.650182	<0.001
Table S5d. Summary of the selected GAM for modeling the relationship between human transmissibility and host phylogenetic distance from humans as a function of spillover type (family = gaussian, n=80). In this analysis, we included only unique entries for each host order per virus, simplifying the datast as outlined in Table S5a. However, in this analysis, we considered both reservoir and seconda…
Term	value	Z statistic	Chi-sq statistic	P-value	Effective degrees of freedom	Total deviance explained
Intercept	-0.5586	-0.421		0.674		34.5
phylogenetic distance from humans, by = primary spillover type			65.77	<0.01**	0.9047
phylogenetic distance from humans, by = secondary spillover type			0	0.76905	<0.001
max gestation period			0	0.46707	<0.001
max litter size			0	0.66321	<0.001
max lifespan			0	0.35909	<0.001
host order			13.42	<0.01**	3.765
max number of disease-related citations			0	1	<0.001
max host body mass			16.4	<0.01**	1.187
Table S5e. Summary of the selected GAM for viral traits predictive of the probability that a virus is zoonotic (n=318). For this analysis, we considered all viruses in the Table S2 database. The selected model included 318 of the 345 viruses in the database, excluding viruses with unavailable data for included trait predictors.
Term	value	Z statistic	Chi-sq statistic	P-value	Effective degrees of freedom	Total deviance explained
Intercept	-2.169	-0.024		0.981		32.5
PubMed publications on a virus species (research effort)			0	0.338912	<0.001
whether or not a virus is enveloped			0	0.933344	<0.001
average genome length			0	0.63095	<0.001
max phylogenetic distance from humans across a virus' nonhuman mammalian host species			173.3	<0.001***	2.247
DNA or RNA			0	0.655014	<0.001
cytoplasmic replication			26.13	<0.001***	1
max phylogenetic breadth of a virus' nonhuman mammalian host species			28.44	<0.001***	0.9613
genome composition			11.69	<0.1*	2.997
Table S5f. Summary of the selected GAM for viral traits predictive of human case fatality rate for a given virus (n=62). This analysis included only unique zoonotic virus entries, grouped by unique case fatality rates per virus.
Term	value	T statistic	F value	P-value	Effective degrees of freedom	Total deviance explained
Intercept	0.18678	2.127		<0.1*		53.8
max phylogenetic breadth of a virus' nonhuman mammalian host species			0	0.526564	<0.001
max phylogenetic distance from humans across a virus' nonhuman mammalian host species			8.585	<0.001***	4.41
PubMed publications on a virus species (research effort)			1.052	<0.1*	0.9648
whether or not a virus is enveloped			2.472	<0.1*	0.667
average genome length			0	0.465992	<0.001
DNA or RNA			0	0.536192	<0.001
cytoplasmic replication			0	0.516537	<0.001
genome composition			0.223	0.252272	0.8326
Table S5g. Summary of the selected GAM for viral traits predictive of human transmissibility for a given virus (n=62). This analysis included only unique zoonotic virus entries, grouped by unique human case fatality rates and transmissibility rankings per virus.
Term	value	Z statistic	Chi-sq statistic	P-value	Effective degrees of freedom	Total deviance explained
Intercept	-0.1985	-0.093		0.926		55.1
max phylogenetic breadth of a virus' nonhuman mammalian host species			16.449	<0.01**	3.275
max phylogenetic distance from humans across a virus' nonhuman mammalian host species			24.589	<0.001***	0.938
PubMed publications on a virus species (research effort)			0	0.457975	<0.001
average genome length			0	0.963812	<0.001
whether or not a virus is enveloped			25.57	<0.001***	0.9452
DNA or RNA			3.627	<0.1*	0.6953
cytoplasmic replication			0	0.805292	<0.001
genome composition			1.815	0.260102	1.187

## Sheet: Table S6
Table S6. Pearson correlation coefficients for host predictors. Calculated using the 'rcorr' function in the R package 'Hmisc'.
Pearson correlation coefficients
	Adult body mass	Litter size	Max lifespan	Gestation period	Host phylogenetic distance from humans
Adult body mass	1	-0.09	0.44	0.61	0.07
Litter size	-0.09	1	-0.5	-0.55	0.25
Max lifespan	0.44	-0.5	1	0.76	-0.55
Gestation period	0.61	-0.55	0.76	1	-0.4
Host phylogenetic distance from humans	0.07	0.25	-0.55	-0.4	1
Corresponding p-values
	Adult body mass	Litter size	Max lifespan	Gestation period	Host phylogenetic distance from humans
Adult body mass		0.1231	<0.001***	<0.001***	0.2377
Litter size	0.1231		<0.001***	<0.001***	<0.001***
Max lifespan	<0.001***	<0.001***		<0.001***	<0.001***
Gestation period	<0.001***	<0.001***	<0.001***		<0.001***
Host phylogenetic distance from humans	0.2377	<0.001***	<0.001***	<0.001***

## Sheet: Table S7
Table S7. Partial effects of host phylogenetic order on human case fatality rate from the selected GAM for host traits predictive of human case fatality rate (full model output outlined in Table S5a). Bold text indicates the host order with the strongest positive effect on zoonotic status.
host order	strength of effect on human case fatality rate
Carnivora	0.520742
Cetartiodactyla	-1.35836
Chiroptera	1.87115
Eulipotyphla	-0.450996
Lagomorpha	0.524622
Perissodactyla	0.462929
Primates	-1.13685
Rodentia	-0.433233

## Sheet: Table S8
Table S8. Review of main findings from past meta-analyses.
	Proportion Zoonotic in Host	Effect on Human-to-human Transmission	Effect on Human Case Mortality
Landscape Trait
Urban/Rural Human Population in Reservoir Range	Increases (Olival et al., 2017)	Significant	Significant
Human Population Density Increases	Increases (Olival et al., 2017)
Agricultural Land Use in Species Range	Increases	Significant	Significant
Reservoir Host Trait
Non-human Primates		Increases (Walker et al., 2018)
Phylogenetic Distance	U-Shape (Olival et al., 2017)	Increases	Increases
Host Hunted	Increases (Olival et al., 2017)		Increases
Ecological Network Centrality (in primates)	Increases (Gomez et al., 2013)
Fast Life History (in rodents and bats)	Increases (Han et al., 2015)(Han et al., 2016)
Spillover Type x Phylogenetic Distance			U-Shape
Viral Trait
Non-enveloped	Increases	Increases (Walker et al., 2018, Geoghegan et al., 2016)	Decreases
Small Virus Particle Size		Increases (Walker et al., 2018)
Genome Segmentation		Decreases (Walker et al., 2018, Geoghegan et al., 2016)
Double Stranded Genome		Increases (Walker et al., 2018)
Genome Length		Increases (Geoghegan et al., 2016)
RNA virus	Increases (Olival et al., 2017)
Recombination Frequency	Increases	Increases (Geoghegan et al., 2016)
Replication in Cytoplasm	Increases (Olival et al., 2017)
Use of phylogenetically conserved host receptors	Increases (Woolhouse et al., 2012)
Phylogenetic Breath of Hosts	Increases (Olival et al., 2017)	Non-linear
Human Trait
Presence in liver and nervous system		Increases (Walker et al., 2018)
Presence in respitory track		Increases (Walker et al., 2018)
Duration of Infecton		Increases (Geoghegan et al., 2016 et al., 2016)
Human Case Mortality		Decreases (Geoghegan et al., 2016 et al., 2016)
Transmission trait
Arthopod vectored	Increases (Olival et al., 2017)	Decreases (Walker et al., 2018, Geoghegan et al., 2016 et al., 2016)
Blood or sexual contact		Increases (Geoghegan et al., 2016 et al., 2016)
Biting		Decreases (Geoghegan et al., 2016 et al., 2016)

## Sheet: Trait references
References for viral and host traits collected in this study.
Adriano, André Ricardo, Carlos Daniel Quiroz, Martha Liliana Acosta, Thiago Jeunon, and Flávia Bonini. “Milker’s Nodule - Case Report.” Anais Brasileiros de Dermatologia 90, no. 3 (June 2015): 407–10. https://doi.org/10.1590/abd1806-4841.20153283.
Ai, Jing-Wen, Shan-Shan Weng, Qi Cheng, Peng Cui, Yong-Jun Li, Hong-Long Wu, Yi-Min Zhu, Bin Xu, and Wen-Hong Zhang. “Human Endophthalmitis Caused By Pseudorabies Virus Infection, China, 2017.” Emerging Infectious Diseases 24, no. 6 (June 2018): 1087–90. https://doi.org/10.3201/eid2406.171612.
Allen, Toph, Kris A. Murray, Carlos Zambrana-Torrelio, Stephen S. Morse, Carlo Rondinini, Moreno Di Marco, Nathan Breit, Kevin J. Olival, and Peter Daszak. “Global Hotspots and Correlates of Emerging Zoonotic Diseases.” Nature Communications 8, no. 1 (December 2017). https://doi.org/10.1038/s41467-017-00923-8.
Al-Tawfiq, Jaffar A., Alimuddin Zumla, and Ziad A. Memish. “Travel Implications of Emerging Coronaviruses: SARS and MERS-CoV.” Travel Medicine and Infectious Disease 12, no. 5 (September 2014): 422–28. https://doi.org/10.1016/j.tmaid.2014.06.007.
Aniţă, Adriana, Lucian Gorgan, Dragoş Aniţă, Luanda Oşlobanu, Nicole Pavio, and Gheorghe Savuţa. “Evidence of Hepatitis E Infection in Swine and Humans in the East Region of Romania.” International Journal of Infectious Diseases 29 (December 2014): 232–37. https://doi.org/10.1016/j.ijid.2014.10.018.
Archer, Angela M., and Rebeca Rico-Hesse. “High Genetic Divergence and Recombination in Arenaviruses from the Americas.” Virology 304, no. 2 (December 2002): 274–81. https://doi.org/10.1006/viro.2002.1695.
Babkin, Igor, and Irina Babkina. “The Origin of the Variola Virus.” Viruses 7, no. 3 (March 10, 2015): 1100–1112. https://doi.org/10.3390/v7031100.
Balamurugan, Vinayagamurthy, Gnanavel Venkatesan, Veerakyathappa Bhanuprakash, and Raj Kumar Singh. “Camelpox, an Emerging Orthopox Viral Disease.” Indian Journal of Virology 24, no. 3 (December 2013): 295–305. https://doi.org/10.1007/s13337-013-0145-0.
Barr, J. A., C. Smith, G. A. Marsh, H. Field, and L.-F. Wang. “Evidence of Bat Origin for Menangle Virus, a Zoonotic Paramyxovirus First Isolated from Diseased Pigs.” Journal of General Virology 93, no. Pt_12 (December 1, 2012): 2590–94. https://doi.org/10.1099/vir.0.045385-0.
Barraviera, S.R.C.S. “Diseases Caused by Poxvirus - Orf and Milker’s Nodules: A Review.” Journal of Venomous Animals and Toxins Including Tropical Diseases 11, no. 2 (June 2005). https://doi.org/10.1590/S1678-91992005000200002.
Barrette et al. 2009. Discovery of swine as a host for the reston ebolavirus
Becher, P., M. König, G. Müller, U. Siebert, and H.-J. Thiel. “Characterization of Sealpox Virus, a Separate Member of the Parapoxviruses.” Archives of Virology 147, no. 6 (June 2002): 1133–40. https://doi.org/10.1007/s00705-002-0804-8.
Bera, B.C., K. Shanmugasundaram, Sanjay Barua, G. Venkatesan, Nitin Virmani, T. Riyesh, B.R. Gulati, et al. “Zoonotic Cases of Camelpox Infection in India.” Veterinary Microbiology 152, no. 1–2 (August 2011): 29–38. https://doi.org/10.1016/j.vetmic.2011.04.010.
Bonthius, Daniel J. “Lymphocytic Choriomeningitis Virus: An Underrecognized Cause of Neurologic Disease in the Fetus, Child, and Adult.” Seminars in Pediatric Neurology 19, no. 3 (September 2012): 89–95. https://doi.org/10.1016/j.spen.2012.02.002.
Borchert, Matthias, Sabue Mulangu, Robert Swanepoel, Modeste Lifenya Libande, Antoine Tshomba, Amayo Kulidri, Jean-Jacques Muyembe-Tamfum, and Patrick Van der Stuyft. “Serosurvey on Household Contacts of Marburg Hemorrhagic Fever Patients.” Emerging Infectious Diseases 12, no. 3 (March 2006): 433–39. https://doi.org/10.3201/eid1203.050622.
Brauburger, Kristina, Adam J. Hume, Elke Mühlberger, and Judith Olejnik. “Forty-Five Years of Marburg Virus Research.” Viruses 4, no. 10 (October 1, 2012): 1878–1927. https://doi.org/10.3390/v4101878.
Brown, Ian H. “The Epidemiology and Evolution of In¯uenza Viruses in Pigs.” Veterinary Microbiology, 2000, 18.
Calattini, Sara, Edouard B.A. Betsem, Alain Froment, Philippe Mauclère, Patricia Tortevoye, Christine Schmitt, Richard Njouom, Ali Saib, and Antoine Gessain. “Simian Foamy Virus Transmission from Apes to Humans, Rural Cameroon.” Emerging Infectious Diseases 13, no. 9 (September 2007): 1314–20. https://doi.org/10.3201/eid1309.061162.
Carocci, Margot, and Labib Bakkali-Kassimi. “The Encephalomyocarditis Virus.” Virulence 3, no. 4 (July 2012): 351–67. https://doi.org/10.4161/viru.20573.
Carvalho de Oliveira, Renata, Marcelo Cordeiro-Santos, Alexandro Guterres, Jorlan Fernandes, Alexsandro X. de Melo, Guilherme A.P. João, Maria A.M. Novais, et al. “Rio Mamore Virus and Hantavirus Pulmonary Syndrome, Brazil.” Emerging Infectious Diseases 20, no. 9 (September 2014): 1568–70. https://doi.org/10.3201/eid2009.131472.
Casapía, Martín, Enrique Mamani, María P García, María L Miraval, Pedro Valencia, Alberto H Quino, Carlos Álvarez, and Luis F Donaires. “SÍNDROME PULMONAR POR HANTAVIRUS (VIRUS RÍO MAMORÉ) EN LA AMAZONÍA PERUANA.” Rev Peru Med Exp Salud Publica., n.d., 6.
Center for Food Security and Public Health. 2017. Menangle Infection.
Chantrey, J., H. Meyer, D. Baxby, M. Begon, K. J. Bown, S. M. Hazel, T. Jones, W. I. Montgomery, and M. Bennett. “Cowpox: Reservoir Hosts and Geographic Range.” Epidemiology and Infection 122, no. 3 (June 1999): 455–60. https://doi.org/10.1017/S0950268899002423.
Christensen, L. S., and B. Lomniczi. “High Frequency Intergenomic Recombination of Suid Herpesvirus 1 (SHV-1, Aujeszky’s Disease Virus).” Archives of Virology 132, no. 1–2 (March 1993): 37–50. https://doi.org/10.1007/BF01309842.
Clark, C., P.G. McIntyre, A. Evans, C.J. McInnes, and S. Lewis-Jones. “Human Sealpox Resulting from a Seal Bite: Confirmation That Sealpox Virus Is Zoonotic.” British Journal of Dermatology 152, no. 4 (April 2005): 791–93. https://doi.org/10.1111/j.1365-2133.2005.06451.x.
Clay, Christine A., Erin M. Lehmer, Stephen St. Jeor, and M. Denise Dearing. “Sin Nombre Virus and Rodent Species Diversity: A Test of the Dilution and Amplification Hypotheses.” Edited by Matthew Baylis. PLoS ONE 4, no. 7 (July 31, 2009): e6467. https://doi.org/10.1371/journal.pone.0006467.
Clement, Jan, and Marc Van Ranst. “Three Vole Species and One (?) Novel Arvicolid Hantavirus Pathogen: Tula Virus Revisited.” Eurosurveillance 21, no. 2 (January 14, 2016). https://doi.org/10.2807/1560-7917.ES.2016.21.2.30108.
Dawson, Patrick, Mamunur Rahman Malik, Faruque Parvez, and Stephen S. Morse. “What Have We Learned About Middle East Respiratory Syndrome Coronavirus Emergence in Humans? A Systematic Literature Review.” Vector-Borne and Zoonotic Diseases, January 24, 2019. https://doi.org/10.1089/vbz.2017.2191.
Echavarria, M. “Adenoviruses in Immunocompromised Hosts.” Clinical Microbiology Reviews 21, no. 4 (October 1, 2008): 704–15. https://doi.org/10.1128/CMR.00052-07.
Elmore, David, and Richard Eberle. “Monkey B Virus (Cercopithecine Herpesvirus 1).” Comparative Medicine 58, no. 1 (2008): 11.
Ermonval, Myriam, Florence Baychelier, and Noël Tordo. “What Do We Know about How Hantaviruses Interact with Their Different Hosts?” Viruses 8, no. 8 (August 11, 2016): 223. https://doi.org/10.3390/v8080223.
Fairley, R A, A A Mercer, C I Copland, S M Craig, and P A Heslip. “Persistent Pseudocowpox Virus Infection of the Skin of a Foot in a Cat.” New Zealand Veterinary Journal 61, no. 4 (July 2013): 242–43. https://doi.org/10.1080/00480169.2012.757728.
Faria, N. R., M. A. Suchard, A. Rambaut, D. G. Streicker, and P. Lemey. “Simultaneously Reconstructing Viral Cross-Species Transmission History and Identifying the Underlying Constraints.” Philosophical Transactions of the Royal Society B: Biological Sciences 368, no. 1614 (February 4, 2013): 20120196–20120196. https://doi.org/10.1098/rstb.2012.0196.
Ferrés, Marcela, Pablo Vial, Claudia Marco, Lia Yañez, Paula Godoy, Constanza Castillo, Brian Hjelle, et al. “Prospective Evaluation of Household Contacts of Persons with Hantavirus Cardiopulmonary Syndrome in Chile.” The Journal of Infectious Diseases 195, no. 11 (June 2007): 1563–71. https://doi.org/10.1086/516786.
Field, Hume Ernest. “Evidence of Australian Bat Lyssavirus Infection in Diverse Australian Bat Taxa.” Zoonoses and Public Health 65, no. 6 (September 2018): 742–48. https://doi.org/10.1111/zph.12480.
Field, Hume, Brad McCall, and Janine Barrett. “Australian Bat Lyssavirus Infection in a Captive Juvenile Black Flying Fox.” Emerging Infectious Diseases 5, no. 3 (June 1999): 438–40. https://doi.org/10.3201/eid0503.990316.
Fieldhouse, Jane K., Xinye Wang, Kerry A. Mallinson, Rick W. Tsao, and Gregory C. Gray. “A Systematic Review of Evidence That Enteroviruses May Be Zoonotic.” Emerging Microbes & Infections 7, no. 1 (December 2018): 1–09. https://doi.org/10.1038/s41426-018-0159-1.
Figueiredo, Glauciane Garcia de, Alessandra Abel Borges, Gelse Mazzoni Campos, Alex Martins Machado, Fabiano Pinto Saggioro, Gilberto dos Santos Sabino Júnior, Soraya Jabur Badra, Alberto Anastacio Amarilla Ortiz, and Luiz Tadeu Moraes Figueiredo. “Diagnosis of Hantavirus Infection in Humans and Rodents in Ribeirão Preto, State of São Paulo, Brazil.” Revista Da Sociedade Brasileira de Medicina Tr…
———. “Diagnosis of Hantavirus Infection in Humans and Rodents in Ribeirão Preto, State of São Paulo, Brazil.” Revista Da Sociedade Brasileira de Medicina Tropical 43, no. 4 (August 2010): 348–54. https://doi.org/10.1590/S0037-86822010000400002.
Figueiredo, Luiz T.M., Marcos L. Moreli, Ricardo L.M. de Sousa, Alessandra A. Borges, Glauciane G. de Figueiredo, Alex M. Machado, Ivani Bisordi, et al. “Hantavirus Pulmonary Syndrome, Central Plateau, Southeastern, and Southern Brazil.” Emerging Infectious Diseases 15, no. 4 (April 2009): 561–67. https://doi.org/10.3201/eid1504.080289.
Fooks, A. R., S. M. Brookes, N. Johnson, L. M. McELHINNEY, and A. M. Hutson. “European Bat Lyssaviruses: An Emerging Zoonosis.” Epidemiology and Infection 131, no. 3 (December 2003): 1029–39. https://doi.org/10.1017/S0950268803001481.
Francis, J. R., C. Nourse, V. L. Vaska, S. Calvert, J. A. Northill, B. McCall, and A. C. Mattke. “Australian Bat Lyssavirus in a Child: The First Reported Case.” PEDIATRICS 133, no. 4 (April 1, 2014): e1063–67. https://doi.org/10.1542/peds.2013-1782.
Fraser, Graeme C., Peter T. Hooper, Ross A. Lunt, Allan R. Gould, Laurence J. Gleeson, Alex D. Hyatt, Gail M. Russell, and Jaqueline A. Kattenbelt. “Encephalitis Caused by a Lyssavirus in Fruit Bats in Australia.” Emerging Infectious Diseases 2, no. 4 (December 1996): 327–31. https://doi.org/10.3201/eid0204.960408.
Fulhorst, Charles F., Michael D. Bowen, Thomas G. Ksiazek, Pierre E. Rollin, Stuart T. Nichol, Michael Y. Kosoy, and Clarence J. Peters. “Isolation and Characterization of Whitewater Arroyo Virus, a Novel North American Arenavirus.” Virology 224, no. 1 (October 1996): 114–20. https://doi.org/10.1006/viro.1996.0512.
Gascoyne, S. C., M. K. Laurenson, S. Lelo, and M. Borner. “RABIES IN AFRICAN WILD DOGS (LYCAON PICTUS) IN THE SERENGETI REGION, TANZANIA.” Journal of Wildlife Diseases 29, no. 3 (July 1993): 396–402. https://doi.org/10.7589/0090-3558-29.3.396.
Geoghegan, Jemma L., Alistair M. Senior, Francesca Di Giallonardo, and Edward C. Holmes. “Virological Factors That Increase the Transmissibility of Emerging Human Viruses.” Proceedings of the National Academy of Sciences 113, no. 15 (April 12, 2016): 4170–75. https://doi.org/10.1073/pnas.1521582113.
Ghebremedhin, Beniam. “Human Adenovirus: Viral Pathogen with Increasing Importance.” European Journal of Microbiology and Immunology 4, no. 1 (March 2014): 26–33. https://doi.org/10.1556/EuJMI.4.2014.1.2.
Glaze, Elizabeth R, Michael J Roy, Lonnie W Dalrymple, and Lynda L Lanning. “A Comparison of the Pathogenesis of Marburg Virus Disease in Humans and Nonhuman Primates and Evaluation of the Suitability of These Animal Models for Predicting Clinical Efficacy under the ‘Animal Rule.’” Comparative Medicine 65, no. 3 (2015): 19.
Goeijenbier, M, and J Verner-Carlsson. “Seoul Hantavirus in Brown Rats in the Netherlands: Implications for Physicians.” The Netherlands Journal of Medicine 73, no. 4 (2015): 6.
Grant, Ashley, Alexey Seregin, Cheng Huang, Olga Kolokoltsova, Allan Brasier, Clarence Peters, and Slobodan Paessler. “Junín Virus Pathogenesis and Virus Replication.” Viruses 4, no. 10 (October 19, 2012): 2317–39. https://doi.org/10.3390/v4102317.
Guan, Y. “Isolation and Characterization of Viruses Related to the SARS Coronavirus from Animals in Southern China.” Science 302, no. 5643 (October 10, 2003): 276–78. https://doi.org/10.1126/science.1087139.
Han, Guan-Zhu, and Michael Worobey. “Homologous Recombination in Negative Sense RNA Viruses.” Viruses 3, no. 8 (August 4, 2011): 1358–73. https://doi.org/10.3390/v3081358.
Huang, Fen, Yunlong Li, Wenhai Yu, Shenrong Jing, Jue Wang, Feiyan Long, Zhanlong He, et al. “Excretion of Infectious Hepatitis E Virus into Milk in Cows Imposes High Risks of Zoonosis.” Hepatology 64, no. 2 (August 2016): 350–59. https://doi.org/10.1002/hep.28668.
Huff, Jennifer L., and Peter A. Barry. “B-Virus ( Cercopithecine Herpesvirus 1) Infection in Humans and Macaques: Potential for Zoonotic Disease.” Emerging Infectious Diseases 9, no. 2 (February 2003): 246–50. https://doi.org/10.3201/eid0902.020272.
Jayme, Sarah I., Hume E. Field, Carol de Jong, Kevin J. Olival, Glenn Marsh, Anson M. Tagtag, Tom Hughes, et al. “Molecular Evidence of Ebola Reston Virus Infection in Philippine Bats.” Virology Journal 12, no. 1 (December 2015). https://doi.org/10.1186/s12985-015-0331-3.
Johne, R., A. Plenge-Bonig, M. Hess, R. G. Ulrich, J. Reetz, and A. Schielke. “Detection of a Novel Hepatitis E-like Virus in Faeces of Wild Rats Using a Nested Broad-Spectrum RT-PCR.” Journal of General Virology 91, no. 3 (March 1, 2010): 750–58. https://doi.org/10.1099/vir.0.016584-0.
Kantele, A., K. Chickering, O. Vapalahti, and A.W. Rimoin. “Emerging Diseases—the Monkeypox Epidemic in the Democratic Republic of the Congo.” Clinical Microbiology and Infection 22, no. 8 (August 2016): 658–59. https://doi.org/10.1016/j.cmi.2016.07.004.
“Kaplan 1969.Pdf,” n.d.
Kasorndorkbua, C., D. K. Guenette, F. F. Huang, P. J. Thomas, X.-J. Meng, and P. G. Halbur. “Routes of Transmission of Swine Hepatitis E Virus in Pigs.” Journal of Clinical Microbiology 42, no. 11 (November 1, 2004): 5047–52. https://doi.org/10.1128/JCM.42.11.5047-5052.2004.
Klein, Terry A., Heung-Chul Kim, Sung-Tae Chong, Jeong-Ah Kim, Sook-Young Lee, Won-Keun Kim, Peter V. Nunn, and Jin-Won Song. “Hantaan Virus Surveillance Targeting Small Mammals at Nightmare Range, a High Elevation Military Training Area, Gyeonggi Province, Republic of Korea.” Edited by Florian Krammer. PLOS ONE 10, no. 4 (April 15, 2015): e0118483. https://doi.org/10.1371/journal.pone.0118483.
Knust, Barbara, and Pierre E. Rollin. “Twenty-Year Summary of Surveillance for Human Hantavirus Infections, United States.” Emerging Infectious Diseases 19, no. 12 (December 2013): 1934–37. https://doi.org/10.3201/eid1912.131217.
Kuzmin, Ivan V., Brooke Bozick, Sarah A. Guagliardo, Rebekah Kunkel, Joshua R. Shak, Suxiang Tong, and Charles E. Rupprecht. “Bats, Emerging Infectious Diseases, and the Rabies Paradigm Revisited.” Emerging Health Threats Journal 4, no. 1 (January 2011): 7159. https://doi.org/10.3402/ehtj.v4i0.7159.
Lele, S.M., M.L. Milazzo, K. Graves, J.F. Aronson, A.B. West, and C.F. Fulhorst. “Pathology of Whitewater Arroyo Viral Infection in the White-Throated Woodrat (Neotoma Albigula).” Journal of Comparative Pathology 128, no. 4 (May 2003): 289–92. https://doi.org/10.1053/jcpa.2002.0635.
Li, F C K, B C K Choi, T Sly, and A W P Pak. “Finding the Real Case-Fatality Rate of H5N1 Avian Influenza.” Journal of Epidemiology & Community Health 62, no. 6 (June 1, 2008): 555–59. https://doi.org/10.1136/jech.2007.064030.
Li, Song, Mingxia Liu, Jingjing Cong, Yufa Zhou, and Zengmin Miao. “Detection and Characterization of Hepatitis E Virus in Goats at Slaughterhouse in Tai’an Region, China.” BioMed Research International 2017 (2017): 1–5. https://doi.org/10.1155/2017/3723650.
Lloyd-Smith, J. O., D. George, K. M. Pepin, V. E. Pitzer, J. R. C. Pulliam, A. P. Dobson, P. J. Hudson, and B. T. Grenfell. “Epidemic Dynamics at the Human-Animal Interface.” Science 326, no. 5958 (December 4, 2009): 1362–67. https://doi.org/10.1126/science.1177345.
Manzione, Nuris de, Rosa Alba Salas, Hector Paredes, Oswaldo Godoy, Luis Rojas, Francisco Araoz, Charles F. Fulhorst, et al. “Venezuelan Hemorrhagic Fever: Clinical and Epidemiological Studies of 165 Cases.” Clinical Infectious Diseases 26, no. 2 (February 1998): 308–13. https://doi.org/10.1086/516299.
Markotter, Wanda, Ara Monadjem, and Louis H. Nel. “Antibodies against Duvenhage Virus in Insectivorous Bats in Swaziland.” Journal of Wildlife Diseases 49, no. 4 (October 2013): 1000–1003. https://doi.org/10.7589/2012-10-257.
Martinez, Valeria P., Carla Bellomo, Jorge San Juan, Diego Pinna, Raul Forlenza, Malco Elder, and Paula J. Padula. “Person-to-Person Transmission of Andes Virus.” Emerging Infectious Diseases 11, no. 12 (December 2005): 1848–53. https://doi.org/10.3201/eid1112.050501.
Mauldin, Matthew, Markus Antwerpen, Ginny Emerson, Yu Li, Gudrun Zoeller, Darin Carroll, and Hermann Meyer. “Cowpox Virus: What’s in a Name?” Viruses 9, no. 5 (May 9, 2017): 101. https://doi.org/10.3390/v9050101.
Mccoll, Ka, T Chamberlain, Ra Lunt, Km Newberry, D Middleton, and Ha Westbury. “Pathogenesis Studies with Australian Bat Lyssavirus in Grey-Headed Flying Foxes (Pteropus Poliocephalus).” Australian Veterinary Journal 80, no. 10 (October 2002): 636–41. https://doi.org/10.1111/j.1751-0813.2002.tb10973.x.
Middleton, Deborah. “Hendra Virus.” Veterinary Clinics of North America: Equine Practice 30, no. 3 (December 2014): 579–89. https://doi.org/10.1016/j.cveq.2014.08.004.
Milazzo, Mary L., Maria N.B. Cajimat, Gloria Duno, Freddy Duno, Antonio Utrera, and Charles F. Fulhorst. “Transmission of Guanarito and Pirital Viruses among Wild Rodents, Venezuela.” Emerging Infectious Diseases 17, no. 12 (December 2011): 2209–15. https://doi.org/10.3201/eid1712.110393.
Morikawa, Shigeru, Masayuki Saijo, and Ichiro Kurane. “Current Knowledge on Lower Virulence of Reston Ebola Virus (in French: Connaissances Actuelles Sur La Moindre Virulence Du Virus Ebola Reston).” Comparative Immunology, Microbiology and Infectious Diseases 30, no. 5–6 (September 2007): 391–98. https://doi.org/10.1016/j.cimid.2007.05.005.
Morzunov, S P, H Feldmann, C F Spiropoulou, V A Semenova, T G Ksiazek, C J Peters, S T Nichol, and J Virol. “A Newly Recognized Virus Associated with a Fatal Case of Hantavirus Pulmonary Syndrome in Louisiana.” 69 (1995): 5.
Mossoun, Arsène, Sébastien Calvignac-Spencer, Augustin E. Anoh, Maude S. Pauly, Daniel A. Driscoll, Adam O. Michel, Lavry Grah Nazaire, et al. “Bushmeat Hunting and Zoonotic Transmission of Simian T-Lymphotropic Virus 1 in Tropical West and Central Africa.” Edited by Guido Silvestri. Journal of Virology 91, no. 10 (May 15, 2017). https://doi.org/10.1128/JVI.02479-16.
Mouinga-Ondémé, Augustin, and Mirdad Kazanji. “Simian Foamy Virus in Non-Human Primates and Cross-Species Transmission to Humans in Gabon: An Emerging Zoonotic Disease in Central Africa?” Viruses 5, no. 6 (June 19, 2013): 1536–52. https://doi.org/10.3390/v5061536.
Müller, G., S. Gröters, U. Siebert, T. Rosenberger, J. Driver, M. König, P. Becher, U. Hetzel, and W. Baumgärtner. “Parapoxvirus Infection in Harbor Seals ( Phoca Vitulina ) from the German North Sea.” Veterinary Pathology 40, no. 4 (July 2003): 445–54. https://doi.org/10.1354/vp.40-4-445.
Nel, L. H. 2001. Mokola Virus: A brief review of the status quo.
Nelson, Randin, Raul Cañate, Juan Miguel Pascale, Jerry W. Dragoo, Blas Armien, Anibal G. Armien, and Frederick Koster. “Confirmation of Choclo Virus as the Cause of Hantavirus Cardiopulmonary Syndrome and High Serum Antibody Prevalence in Panama.” Journal of Medical Virology 82, no. 9 (July 15, 2010): 1586–93. https://doi.org/10.1002/jmv.21864.
Nguyen, D. V., H. Harvala, E. M. Ngole, E. Delaporte, M. E. J. Woolhouse, M. Peeters, and P. Simmonds. “High Rates of Infection with Novel Enterovirus Variants in Wild Populations of Mandrills and Other Old World Monkey Species.” Journal of Virology 88, no. 11 (June 1, 2014): 5967–76. https://doi.org/10.1128/JVI.00088-14.
Nolen, Leisha Diane, Lynda Osadebe, Jacques Katomba, Jacques Likofata, Daniel Mukadi, Benjamin Monroe, Jeffrey Doty, et al. “Extended Human-to-Human Transmission during a Monkeypox Outbreak in the Democratic Republic of the Congo.” Emerging Infectious Diseases 22, no. 6 (June 2016): 1014–21. https://doi.org/10.3201/eid2206.150579.
Nugent, Kenneth, and James Alexander. “Hantavirus Pulmonary Syndrome in Texas: An Update Covering Years 1993 through 2016.” The Southwest Respiratory and Critical Care Chronicles 6, no. 22 (January 19, 2018): 16. https://doi.org/10.12746/swrccc.v6i22.436.
Oberste, M. Steven, Eduardo Gotuzzo, Patrick Blair, W. Allan Nix, Thomas G. Ksiazek, James A. Comer, Pierre Rollin, Cynthia S. Goldsmith, James Olson, and Tadeusz J. Kochel. “Human Febrile Illness Caused by Encephalomyocarditis Virus Infection, Peru.” Emerging Infectious Diseases 15, no. 4 (April 2009): 640–46. https://doi.org/10.3201/eid1504.081428.
Papa, Anna. “Dobrava-Belgrade Virus: Phylogeny, Epidemiology, Disease.” Antiviral Research 95, no. 2 (August 2012): 104–17. https://doi.org/10.1016/j.antiviral.2012.05.011.
Patterson, Michael, Ashley Grant, and Slobodan Paessler. “Epidemiology and Pathogenesis of Bolivian Hemorrhagic Fever.” Current Opinion in Virology 5 (April 2014): 82–90. https://doi.org/10.1016/j.coviro.2014.02.007.
Pavio, Nicole, Xiang-Jin Meng, and Virginie Doceul. “Zoonotic Origin of Hepatitis E.” Current Opinion in Virology 10 (February 2015): 34–41. https://doi.org/10.1016/j.coviro.2014.12.006.
Pavio, Nicole, Xiang-Jin Meng, and Christophe Renou. “Zoonotic Hepatitis E: Animal Reservoirs and Emerging Risks.” Veterinary Research 41, no. 6 (November 2010): 46. https://doi.org/10.1051/vetres/2010018.
Pigott, David M., Nick Golding, Adrian Mylne, Zhi Huang, Daniel J. Weiss, Oliver J. Brady, Moritz U. G. Kraemer, and Simon I. Hay. “Mapping the Zoonotic Niche of Marburg Virus Disease in Africa.” Transactions of The Royal Society of Tropical Medicine and Hygiene 109, no. 6 (June 2015): 366–78. https://doi.org/10.1093/trstmh/trv024.
Pulliam, Juliet R. C., and Jonathan Dushoff. “Ability to Replicate in the Cytoplasm Predicts Zoonotic Transmission of Livestock Viruses.” The Journal of Infectious Diseases 199, no. 4 (February 15, 2009): 565–68. https://doi.org/10.1086/596510.
Radonić, Aleksandar, Sonja Metzger, Piotr Wojtek Dabrowski, Emmanuel Couacy-Hymann, Livia Schuenadel, Andreas Kurth, Kerstin Mätz-Rensing, Christophe Boesch, Fabian H Leendertz, and Andreas Nitsche. “Fatal Monkeypox in Wild-Living Sooty Mangabey, Côte d’Ivoire, 2012.” Emerging Infectious Diseases 20, no. 6 (2014): 4.
Raj, V. Stalin, Elmoubasher A.B.A. Farag, Chantal B.E.M. Reusken, Mart M. Lamers, Suzan D. Pas, Jolanda Voermans, Saskia L. Smits, et al. “Isolation of MERS Coronavirus from a Dromedary Camel, Qatar, 2014.” Emerging Infectious Diseases 20, no. 8 (August 2014). https://doi.org/10.3201/eid2008.140663.
Richardson, Kyle S., Amy Kuenzi, Richard J. Douglass, Julie Hart, and Scott Carver. “Human Exposure to Particulate Matter Potentially Contaminated with Sin Nombre Virus.” EcoHealth 10, no. 2 (June 2013): 159–65. https://doi.org/10.1007/s10393-013-0830-x.
Robardet, Emmanuelle, Christophe Borel, Marie Moinet, Dorothée Jouan, Marine Wasniewski, Jacques Barrat, Franck Boué, et al. “Longitudinal Survey of Two Serotine Bat (Eptesicus Serotinus) Maternity Colonies Exposed to EBLV-1 (European Bat Lyssavirus Type 1): Assessment of Survival and Serological Status Variations Using Capture-Recapture Models.” Edited by Charles E Rupprecht. PLOS Neglected Trop…
Roess, Amira, Rebecca Levine, Laura Barth, Benjamin Monroe, Darin Carroll, Inger Damon, and Mary Reynolds. “Sealpox Virus in Marine Mammal Rehabilitation Facilities, North America, 2007–2009.” Emerging Infectious Diseases 17, no. 12 (2011). https://doi.org/10.3201/eid1712.101945.
Roy, Soumitra, Luk H. Vandenberghe, Sergey Kryazhimskiy, Rebecca Grant, Roberto Calcedo, Xin Yuan, Martin Keough, et al. “Isolation and Characterization of Adenoviruses Persistently Shed from the Gastrointestinal Tract of Non-Human Primates.” Edited by Colin Parrish. PLoS Pathogens 5, no. 7 (July 3, 2009): e1000503. https://doi.org/10.1371/journal.ppat.1000503.
Sabeta, Claude T., Drienie Janse van Rensburg, Baby Phahladira, Debra Mohale, Robert F. Harrison-White, Carlien Esterhuyzen, and June H. Williams. “Rabies of Canid Biotype in Wild Dog (Lycaon Pictus) and Spotted Hyaena (Crocuta Crocuta) in Madikwe Game Reserve, South Africa in 2014–2015: Diagnosis, Possible Origins and Implications for Control.” Journal of the South African Veterinary Association…
Sabeta, Claude T., Wanda Markotter, Debrah K. Mohale, Wonderful Shumba, Alexander I. Wandeler, and Louis H. Nel. “Mokola Virus in Domestic Mammals, South Africa.” Emerging Infectious Diseases 13, no. 9 (September 2007): 1371–73. https://doi.org/10.3201/eid1309.070466.
Saijo, M., Y. Ami, Y. Suzaki, N. Nagata, N. Iwata, H. Hasegawa, I. Iizuka, et al. “Virulence and Pathophysiology of the Congo Basin and West African Strains of Monkeypox Virus in Non-Human Primates.” Journal of General Virology 90, no. 9 (September 1, 2009): 2266–71. https://doi.org/10.1099/vir.0.010207-0.
Saluzzo et al. 1984. Premier isolement du virus mokola. Ann. Virol. 135: 57-66.
Samaratunga, Searle, and Hudson. “Non-Rabies Lyssavirus Human Encephalitis from Fruit Bats: Australian Bat Lyssavirus (Pteropid Lyssavirus) Infection.” Neuropathology and Applied Neurobiology 24, no. 4 (August 1998): 331–35. https://doi.org/10.1046/j.1365-2990.1998.00129.x.
Schmidt, Sabrina, Moritz Saxenhofer, Stephan Drewes, Mathias Schlegel, Konrad M. Wanka, Raphael Frank, Sven Klimpel, et al. “High Genetic Structuring of Tula Hantavirus.” Archives of Virology 161, no. 5 (May 2016): 1135–49. https://doi.org/10.1007/s00705-016-2762-6.
Serra-Cobo, Jordi. “European Bat Lyssavirus Infection in Spanish Bat Populations.” Emerging Infectious Diseases 8, no. 4 (April 2002): 413–20. https://doi.org/10.3201/eid0804.010263.
Serra-Cobo, Jordi, Marc López-Roig, Magdalena Seguí, Luisa Pilar Sánchez, Jacint Nadal, Miquel Borrás, Rachel Lavenir, and Hervé Bourhy. “Ecological Factors Associated with European Bat Lyssavirus Seroprevalence in Spanish Bats.” Edited by Michelle L. Baker. PLoS ONE 8, no. 5 (May 20, 2013): e64467. https://doi.org/10.1371/journal.pone.0064467.
Shaffer, Jeffrey G., Donald S. Grant, John S. Schieffelin, Matt L. Boisen, Augustine Goba, Jessica N. Hartnett, Danielle C. Levy, et al. “Lassa Fever in Post-Conflict Sierra Leone.” Edited by Brian Bird. PLoS Neglected Tropical Diseases 8, no. 3 (March 20, 2014): e2748. https://doi.org/10.1371/journal.pntd.0002748.
Sharp, P. M., and B. H. Hahn. “Origins of HIV and the AIDS Pandemic.” Cold Spring Harbor Perspectives in Medicine 1, no. 1 (September 1, 2011): a006841–a006841. https://doi.org/10.1101/cshperspect.a006841.
Sibold, C, R Ulrich, M Labuda, AÊ Lundkvist, H Martens, K Leitmeyer, and H Meisel. “Dobrava Hantavirus Causes Hemorrhagic Fever with Renal Syndrome in Central Europe and Is Carried by Two Different Apodemus Mice Species,” n.d., 10.
Song, Joon Young, Byung Chul Chun, Soon Duck Kim, Luck Ju Baek, Sang-Hoon Kim, Jang Wook Sohn, Hee Jin Cheong, Woo Joo Kim, Seung Chul Park, and Min Ja Kim. “Epidemiology of Hemorrhagic Fever with Renal Syndrome in Endemic Area of the Republic of Korea, 1995-1998.” Journal of Korean Medical Science 21, no. 4 (2006): 614. https://doi.org/10.3346/jkms.2006.21.4.614.
Speare, Rick, Lee Skerratt, Robert Foster, Lee Berger, Peter Hooper, Ross Lunt, Dinah Hansman, Mike Goulet, and Sandra Cooper. “Australian Bat Lyssavirus Infection in Three Fruit Bats from North Queensland” 21, no. 9 (1997): 16.
Stuchin, M., C.M. Machalaba, K.J. Olival, M. Artois, R.G. Bengis, P. Caceres, F. Diaz, et al. “Rabies as a Threat to Wildlife: -EN- Rabies as a Threat to Wildlife -FR- La Rage En Tant Que Menace Pour La Faune Sauvage -ES- La Rabia, Una Amenaza Para La Fauna Silvestre.” Revue Scientifique et Technique de l’OIE 37, no. 2 (August 1, 2018): 341–57. https://doi.org/10.20506/rst.37.2.2858.
Taylor, Louise H., Sophia M. Latham, and Mark E.J. woolhouse. “Risk Factors for Human Disease Emergence.” Edited by M. E. J. Woolhouse and C. Dye. Philosophical Transactions of the Royal Society of London. Series B: Biological Sciences 356, no. 1411 (July 29, 2001): 983–89. https://doi.org/10.1098/rstb.2001.0888.
Tei, Shuchin, Naoto Kitajima, Kazuaki Takahashi, and Shunji Mishiro. “Zoonotic Transmission of Hepatitis E Virus from Deer to Human Beings.” The Lancet 362, no. 9381 (August 2003): 371–73. https://doi.org/10.1016/S0140-6736(03)14025-1.
The Center for Food Security and Public Health 2010
Thiry, E, A Zicola, D Addie, H Egberink, K Hartmann, H Lutz, H Poulet, and M Horzinek. “Highly Pathogenic Avian Influenza H5N1 Virus in Cats and Other Carnivores.” Veterinary Microbiology 122, no. 1–2 (May 16, 2007): 25–31. https://doi.org/10.1016/j.vetmic.2006.12.021.
Tignor, G. H., F. A. Murphy, H. F. Clark, R. E. Shope, P. Madore, S. P. Bauer, S. M. Buckley, and C. D. Meredith. “Duvenhage Virus: Morphological, Biochemical, Histopathological and Antigenic Relationships to the Rabies Serogroup.” Journal of General Virology 37, no. 3 (December 1, 1977): 595–611. https://doi.org/10.1099/0022-1317-37-3-595.
Toro, Jorge, Jeanette D. Vega, Ali S. Khan, James N. Mills, Paula Padula, William Terry, Zaida Yadón, et al. “An Outbreak of Hantavirus Pulmonary Syndrome, Chile, 1997.” Emerging Infectious Diseases 4, no. 4 (December 1998): 687–94. https://doi.org/10.3201/eid0404.980425.
Vahlenkamp, Moritz, Thomas Müller, Kirsten Tackmann, Ulf Löschner, Herbert Schmitz, and Michael Schreiber. “The Muskrat (Ondatra Zibethicus) as a New Reservoir for Puumala-like Hantavirus Strains in Europe.” Virus Research 57, no. 2 (October 1998): 139–50. https://doi.org/10.1016/S0168-1702(98)00084-7.
Vázquez-Morón, Sonia, Javier Juste, Carlos Ibáñez, Eduardo Ruiz-Villamor, Ana Avellón, Manuel Vera, and Juan E. Echevarría. “Endemic Circulation of European Bat Lyssavirus Type 1 in Serotine Bats, Spain.” Emerging Infectious Diseases 14, no. 8 (August 2008): 1263–66. https://doi.org/10.3201/1408.080068.
Vikøren, Turid, Atle Lillehaug, Johan Åkerstedt, Tord Bretten, Magne Haugum, and Morten Tryland. “A Severe Outbreak of Contagious Ecthyma (Orf) in a Free-Ranging Musk Ox (Ovibos Moschatus) Population in Norway.” Veterinary Microbiology 127, no. 1–2 (February 2008): 10–20. https://doi.org/10.1016/j.vetmic.2007.07.029.
Vos, Ad, Ingrid Kaipf, Annette Denzinger, Anthony R. Fooks, Nick Johnson, and Thomas Müller. “European Bat Lyssaviruses — an Ecological Enigma.” Acta Chiropterologica 9, no. 1 (April 2007): 283–96. https://doi.org/10.3161/1733-5329(2007)9[283:EBLAEE]2.0.CO;2.
Wahlström, Maria, Anne Tuiskunen Bäck, Åke Lundkvist, Jukka Niemimaa, Maria Razzauti, Tarja Sironen, Malin Karlsson, Elina Tonteri, Liina Voutilainen, and Heikki Henttonen. “Life-Long Shedding of Puumala Hantavirus in Wild Bank Voles (Myodes Glareolus).” Journal of General Virology 96, no. 6 (June 1, 2015): 1238–47. https://doi.org/10.1099/vir.0.000076.
Walker, Joseph W., Barbara A. Han, Isabel M. Ott, and John M. Drake. “Transmissibility of Emerging Viral Zoonoses.” Edited by Chuhsing Kate Hsiao. PLOS ONE 13, no. 11 (November 7, 2018): e0206926. https://doi.org/10.1371/journal.pone.0206926.
Wellenberg, G. J., L. Audry, L. Rønsholt, W. H. M. van der Poel, C. J. M. Bruschke, and H. Bourhy. “Presence of European Bat Lyssavirus RNAs in Apparently Healthy Rousettus Aegyptiacus Bats.” Archives of Virology 147, no. 2 (February 1, 2002): 349–61. https://doi.org/10.1007/s705-002-8324-3.
Wolfe, Nathan D., Claire Panosian Dunavan, and Jared Diamond. “Origins of Major Human Infectious Diseases.” Nature 447, no. 7142 (May 2007): 279–83. https://doi.org/10.1038/nature05775.
Woolhouse, Mark E. J., and Liam Brierley. “Epidemiological Characteristics of Human-Infective RNA Viruses.” Scientific Data 5 (February 20, 2018): 180017. https://doi.org/10.1038/sdata.2018.17.
Wu, D., C. Tu, C. Xin, H. Xuan, Q. Meng, Y. Liu, Y. Yu, et al. “Civets Are Equally Susceptible to Experimental Infection by Two Different Severe Acute Respiratory Syndrome Coronavirus Isolates.” Journal of Virology 79, no. 4 (February 15, 2005): 2620–25. https://doi.org/10.1128/JVI.79.4.2620-2625.2005.

[truncated: 1 more sheets: Detection references]
